# Supplementary material for: The moderating role of absorptive capacity and the differential effects of acquisitions and alliances on Big Pharma firms' innovation performance
Source: PLoS One. 2017 Feb 23;12(2):e0172488. doi: 10.1371/journal.pone.0172488 (PMC5322930; doi:10.1371/journal.pone.0172488)
Supplement: S3 File — This file includes the collected data on alliances by big pharma firms as analyzed for this study. (XLSX) [file pone.0172488.s003.xlsx]

## Sheet: alliances_1990
ALL:1990
company	subsidiary	name alliance partner company	Deal value (mil$)	stake equity	target state	country	industry (high-tech) code	Target SIC code	company description	remarks	deal info	Joint Venture Flag	Capitalization Text	Nation of Alliance
J&J	Ortho Biotech Products	Xoma Corp.			CA	US		2836, 8731	Biotechnology company		agreement for developing 2 immunoconjugates: xomazyme-cd5 en xomazyme-cd7. Treatment for graft-versus-host disease (GvHD) and organ transplant rejection; use against Type I diabetes ; XOMA's CD5 Plus and other immunoconjugates
		Immunomedics			NJ	US		2834, 2835	biopharmaceutical company that manufactures, develops and markets monoclonal antibody-based products for the detection and treatment of cancer, autoimmune and other serious diseases. The Group has developed a number of advanced technologies to create humanized antibodies	terminated	Immunomedics Inc. and Johnson & Johnson have agreed to terminate their research and development agreement whereby Johnson & Johnson was funding Immunomedics' efforts to develop certain monoclonal antibody-based products. Under the termination agreement, Johnson & Johnson has released all rights to any technology or products which may have resulted from their previous agreement. In addition, Johns…
	Ortho Biotech Products	Western capital group			OH	US		8731			the development and licensing of an oral form of recombinant human erythropoietin (r-HuEPO) which utilizes drug delivery technology developed by Cortecs Ltd. Cortecs, a subsidiary of WCL
	Janssen Pharmaceutica inc.	R.P. Scherer Corp.			MI	US		2836, 8731	Manufacture drug delivery systems, including soft gelatin capsules for pharmaceutical, vitamin, cosmetic and recreational products, optical products, infusion bottle closers, medicinal and dental products; wholesale ophthalmic and professional goods		R.P. Scherer Corporation and Janssen Pharmaceutica Inc. have entered into a development agreement for the development of a Janssen drug using Scherer's fast dissolving dosage form technology, Zydis. Janssen will pay Scherer to develop Zydis products and will gain an option on exclusive worldwide marketing rights. Scherer will receive development and option fees, and future manufacturing revenues …
	ALZA Corp.	Affymax NV	25			Netherlands		2836, 8731	Provide pharmaceutical research and development services Manufacture and develop pharmaceutical products that incorporate drugs into advanced dosage forms designed to provide controlled, predetermined rates of drug release for extended time periods		Affymax NV and ALZA Corp have agreed in principle to jointly develop and market fifteen of Affymax's biological compounds. Three of the fifteen targets were identified, such as Affymax's Actisite, a sustained release version of tetracycline in a polymeric fiber, used to treat periodontitis
Pfizer	Synbiotics Corp	Telios Pharmaceuticals Inc			CA	US		2834	Manufacture pharmaceutical products; provide laboratory testing services		Synbiotics signed a letter of intent with Telios to develop and test products based on Telios' proprietary peptide technology for the treatment of dry eye and corneal abrasions in canines. The product could be suitable for other animals. Synbiotics would be responsible for sales, marketing, and distribution throughout North America.
	Upjohn Co-Polymer Chemical	Takeda Pharmaceutical Co Ltd				Japan		2834			Takeda Chemical Industries Ltd. and Upjohn Co. agreed to jointly develop pioglitazone, a nonsulphonylurea product for treating non-insulin dependent diabetes.
		Advanced Polymer Systems Inc			CA	US		2834	Manufacture prescription pharmaceuticals intended for final consumption, including biotech products and antibiotics, focusing on research and development of polymer-based delivery systems for the controlled release of active ingredients and therapeutic agents		Advanced Polymer Systems, Inc. (APS) agreed with the Specialty Chemicals Group of Pfizer, Inc. to jointly research applications of APS' patented, polymer-based microscopic sponge. Pfizer agreed to fund research and development of new applications of this "microsponge" for 18 months in return for exclusive rights for all products resulting from the research and development. APS would receive royal…
	Warner-Lambert Co	NeuroSearch A/S				Denmark		2834	NeuroSearch A/S, located in Ballerup, Denmark, manufactures pharmaceuticals products primarily within the field of diseases of the central nervous system; invent, develop and market drugs. The Group focuses on research and development of drugs, primarily targeting diseases related to the central nervous system. The products of the Group are sold mainly to the pharmaceutical industry and later on …		Warner-Lambert Company will co-develop drugs to treat neuro-degenerative and addictive disorders with NeuroSearch AS. Under the pact, Warner-Lambert's Parke-Davis Pharmaceutical Research division will share chemistry and biology resources with NeuroSearch. Warner-Lambert will have worldwide rights to resulting products.
		RP Scherer Corp			MI	US		2834	Manufacture drug delivery systems, including soft gelatin capsules for pharmaceutical, vitamin, cosmetic and recreational products, optical products, infusion bottle closers, medicinal and dental products; wholesale ophthalmic and professional goods		Pfizer, Inc. agreed to pay R.P. Scherer Corporation to develop a new oral form of a pharmaceutical from Pfizer. The agreement calls for Pfizer to fund development and obtain an option on exclusive worldwide marketing rights. Scherer will receive option and development fees and, pending successful product launch, manufacturing revenues and sales royalties. The product will use Scherer's Zydis tech…
	American Cyanamid Co (wyeth)	Emisphere Technologies Inc (clinical tech ass.)			NY	US		2834	Research and develop oral delivery systems and pharmaceuticals for patients who cannot take medications orally		Clinical Technologies Associates Inc. (CTA) and American Cyanamid Co. have signed a letter of intent to perform clinical research at CTA's facilities on a central nervous system product from American Cyanamid which is in phase II clinical trials.
	Corvita Corp	Sumitomo Bakelite Co Ltd				Japan		2821	Sumitomo Bakelite Co Ltd, headquartered in Tokyo, Japan, is engaged in five business segments. The Semiconductor and Display Materials segment provides epoxy molding materials for semiconductor encapsulation, liquid resins for semiconductor uses and adhesive tapes for semiconductor chips. The Circuit Products segment offers phenolic laminated sheets, epoxy laminated sheets, electrolytic copper fo…		Corvita granted Sumitomo Bakelite marketing and manufacturing rights to five of its medical devices in Japan. Among the products included in the agreement were Corvita's small diameter vascular grafts and cardiovascular stent. In addition, Sumitomo agreed to provide engineering assistance and development funding to the three remaining new products.
		Oncogene Science Inc	16		NY	US		2834	Manufacture drugs that target 30 proteins in a wide range of disease areas, including cancer, atherosclerosis, neurological disorders and chronic anemias.		Oncogene Science, Inc. and Pfizer, Inc. have renewed their 5-year Collaborative Research Agreement, which was established to develop products for the treatment of human cancer. Pfizer will provide Oncogene with $16 million in funds to continue development efforts. In return, Oncogene will receive royalties for products developed under the agreement. Specific targets for the research will be: redu…
	Howmedica(Pfizer Inc)	Norian Corp			CA	US		3842	Manufacture synthetic bone material		Howmedica, a subsidiary of Pfizer Inc., and Norian Corp. have entered an agreement whereby Norian will develop its hydroxyapatite coating technology for use with Howmedica's orthopedic implants. Under the agreement, Norian is to provide the coating technology to Howmedica by the fourth quarter of 1991, upon which Howmedica will then pursue clinical trials. Pfizer has also made a minority equity i…
Roche	Tanox Inc	Ciba-Geigy Ltd(Ciba-Geigy AG)				France		2834	Manufacture pharmaceuticals, medicinal products and biological products		Ciba-Geigy Ltd and Tanox Biosystems formed an agreement to jointly develop monoclonal antibody products for the treatment of certain allergies. Under the agreement, the two companies merged their research efforts and shared manufacturing rights. Ciba-Geigy payed Tanox an initial undisclosed amount of money, with additional payments as product development progressed. Ciba-Geigy also acquired a min…		Ciba-Geigy was to pay Tanox Biosystems an initial undisclosed amount of money, with additional payments as product development progressed. Tanox was to receive royalties on Ciba-Geigy's sales of resulting products. Ciba-Geigy was to receive a minority equity stake in Tanox.
	Genentech Inc	Biogen Inc			MA	US		2836	Manufacture genetically engineered human pharmaceuticals; provide pharmaceutical research and development services for the treatment of inflammation, thrombosis, virology and selected cancers		Genentech and Biogen formed a strategic alliance to provide research and development services for human recombinant gamma interferons in the United States. Actimmune, produced by Genentech, would be used to treat patients with chronic granulomatous disease (CGD). Immneron, produced by Biogen, would be used for the treatment of rheumatoid arthritis and veneral warts. Under the agreement, Genentech…
	Chugai Pharmaceutical Co Ltd	Sankyo Co Ltd Yamanouchi Pharmaceutical Co Hoechst Japan Ltd(Hoechst AG) Kyowa Hakko Kogyo Co Ltd Nippon Krea Test Animal Central Lab	4			Japan		2834 2834 2824 2834 2834 8731	Sankyo Co Ltd, headquartered in Tokyo, Japan, is engaged in the manufacture and distribution of pharmaceuticals and agrochemicals. Manufacture prescription pharmaceuticals intended for final consumption, including biotech products and antibiotics Produce proteins from gene modification, as well as other manmade organic fibers; wholesale drugs and chemicals Kyowa Hakko Kogyo Co Ltd, headquartered …		Seven Japanese companies have formed a joint venture, called DNARD, to develop transgenic animals with specific disorders to use in research. The seven companies were: Sankyo Co Ltd, Yamanouchi Pharmaceutical Co Ltd, Hoechst Japan Ltd, a unit of Friedrich Krupp's Hoescht AG, Kyowa Hakko Kogyo Co Ltd, Nippon Krea, Test Animal Central Lab, and Chugai Pharmaceutical Co Ltd.		The seven companies invested $4 mil US (577.6 mil Japanese yen) in the joint venture company.
	Depuy(Boehringer Mannheim) Corange Ltd	DuPont			DE	US		2821	EI du Pont de Nemours & Co {DuPont}, headquartered in Wilmington, Delaware, manufactures and develops fluoropolymers, polymer adhesives, vinyl and laminate flooring, safety glass interlayers, sandblasting materials, lighting lamps, cleaning solvents, disinfectants, lubricants, monomers, inoculants, insecticides, fungicides, optical and thermal color filters, printed circuit boards, semiconductor …		E.I. du Pont de Nemours & Co. and DePuy formed a joint venture to manufacture and market orthopedic products using advanced materials such as composites of polymers and fibers. This venture follows an R&D agreement by the two parent companies signed in July, 1987.
	Syntex USA	Synergen Inc	15		CO	US		2834	Manufacture prescription pharmaceuticals intended for final consumption, including biotech products and antibiotics		Synergen and Syntex formed a joint venture to develop neurotrophic factors which promote the survival and regeneration of cells in the nervous system. Synergen will contribute basic Fibroblast Growth Factor (bFGF), Ciliary Neurotrophic Factor (CNTF), and a compound for treating Parkinson's while Syntex will contribute Nerve Growth Factor technology. Syntex will provide $15 million initial funding…
	IGEN Inc	Japanese Pharm Co				Japan		2835	Manufacture diagnostic and pharmaceutical products		IGEN and a Japanese pharmaceutical company agreed to jointly develop and market Igen's immunodiagnostic instruments and reagents in Japan.
	Hoffmann-La Roche Inc	Genetics Institute Inc			MA	US		2834	Provide pharmaceutical research and development services; manufacture pharmaceuticals		Genetics Institute and Hoffman-La Roche formed a strategic alliance to provide research and development services of HIV-RT, an enzyme that causes AIDS virus to replicate itself inside infected cells in the United States.		The companies agreed to share royalties from product sales.
	Roche Holding AG	Cetus Corp			CA	US		8731	Provide pharmaceutical and biomedical research services; manufacture pharmaceuticals		Cetus and Roche Holding entered an agreement in which both companies marketed Cetus' interleukin-2 product Proleukin and Roche's Roferon A in all European countries except Denmark and Greece. Under the terms of the agreement, each company paid a royalty to the other on sales of its proprietary product. In addition, a Cetus subsidiary collaborated with Roche on the clinical development of interleu…		Each company paid royalties to each other on product sales.
	F Hoffmann-La Roche Ltd	Synergen Inc	8.8		CO	US		2834	Manufacture prescription pharmaceuticals intended for final consumption, including biotech products and antibiotics	terminated	Hoffmann-La Roche discontinued support for Synergen's research program to determine if its interleukin-1 receptor antagonist is a potential treatment for inflammatory diseases. The payments for Hoffmann-La Roche accounted for 64% of its sponsored research and development revenue of $11.9 million in 1989 and 61% of the $2 million received in the first quarter of 1990. Synergen did not expect Hoffa…		Hoffmann-La Roche Inc discontinued support for Synergen's research program which accounted for 64% of its sponsored research and development revenue of $11.9 million in 1989 and 61% of the $2 million received in the first quarter of 1990.
	Tanox Inc	Ciba-Geigy AG				Switzerland		2834	Manufacture, develop and wholesale pharmaceutical and chemical products including medicinal, organic and agricultural chemicals, paints		Ciba-Geigy and Tanox Biosystems agreed to develop jointly anti-allergic agents. As part of the agreement, Ciba-Geigy acquired a minority stake in Tanox Biosystems, the manufacturer of biological products. Ciba-Geigy was a developer and wholesaler of pharmaceutical and chemical products.
	Hoffmann-La Roche Inc	Alpha 1 Biomedicals Inc			CA	US		2836	Biotechnology company		Alpha 1 Biomedicals Inc. has granted Hoffmann-La Roche a development license concerning Thymosin alpha 1, an adjuvant to hepatitis and influenza vaccines and cancer treatments. Hoffman-La Roche will be permitted to develop the drug in 21 different countries. Previously, Hoffmann-La Roche was licensed to develop the drug only in Italy.
	Genentech Inc	Baxter Healthcare Corp			IL	US		2834	Baxter Healthcare Corp, located in Deerfield, Illinois, manufactures pharmaceutical and medicinal products, surgical instruments and laboratory equipment.		Baxter Healthcare Corp.'s Hyland division and Genentech Inc. agreed to co-develop and market Genentech's recombinant tissue factor as a treatment for hemophilia patients who do not respond to coagulation protein replacement therapies. Genentech will license Hyland to conduct clinical trials and to market the recombinant tissue factor supplied by Genentech. Clinical trials are expected to begin in…
	Roche Holding AG	Cortecs Ltd				UK		2834	Manufacture prescription pharmaceuticals intended for final consumption, including biotech products and antibiotics		Cortecs and Roche formed a strategic alliance to manufacture and develop an oral form of Roche's Roferon as a potential treatment for AIDS-related Kaposi's Sarcoma, hairy-cell leukemia, chronic hepatitis, colorectal cancer, and lung cancer. Under the agreement, Cortecs was to manufacture the final products using its Macromol delivery system. The system prevented the breakdown of the drug by the d…
	Chugai Pharmaceutical Co Ltd	Vertex Pharmaceuticals Inc	21		MA	US		2834	Vertex Pharmaceuticals Inc, located in Cambridge, Massachusetts, is a biotechnology company. It is engaged in the business of discovering and developing small molecule drugs for the treatment of serious diseases. The company has a number of drug candidates in development, including compounds targeting hepatitis C virus (HCV) infection, rheumatoid arthritis (RA), cystic fibrosis, cancer, pain and …		Chugai Pharmaceutical Co Ltd and Vertex Pharmaceuticals Inc formed a strategic alliance to provide research and development services in North America. The goal of the alliance was to develop orally active immunosuppressive drugs for treating organ transplant rejection and autoimmune disorders, such as insulin-dependent diabetes, rheumatoid arthritis and psoriasis. Under the agreement, Chugai was …		Under the agreement, Chugai was to pay Vertex $19 million in research funding and $9 million in milestone payments. Chugai also paid $2 million for an equity stake in Vertex of undisclosed size. Chugai was also supposed to make royalty payments on Far East sales.
	Hoffmann-La Roche Inc	Xenova Ltd				UK		8731	Provide biological research services		Xenova and Hoffmann-La Roche agreed to extend their March 1989 agreement for collaborative research on small molecule inhibitors of T-cell activation.
	IGEN Inc	Japanese Pharm Co				Japan		2835	Manufacture diagnostic and pharmaceutical products		IGEN and a Japanese pharmaceutical company agreed to research catalytic antibody pharmaceuticals.
GSK	Glaxo Holdings PLC	IAF BioChem International Inc	15			Canada		8731	Provide pharmaceutical research services; manufacture vaccines		IAF BioChem International and Glaxo Group formed a 5-year strategic alliance to provide BCH-189 nucleoside compound development and marketing services for the treatment of AIDS. Glaxo also agreed to provide funding of $3 million a year for up to five years. Under the agreement, Glaxo would have exclusive rights to the drug outside the United States and Canada. A joint venture equally owned by bot…		Glaxo agreed to provide $3 million a year in funding for the program, for up to five years.
	Genelabs Technologies Inc	Diagnostics Pasteur				France		2835	Manufacture diagnostic preparations		Diagnostics Pasteur and Genelabs Technologies agreed to jointly research and develop a Genelabs hepatitis C diagnostic product. The agreement included co-exclusive marketing rights for products that resulted from the collaboration in exchange for undisclosed cash and royalty payments. Genelabs was to retain marketing rights to the products in certain Asian countries.		The agreement included an undisclosed sum in cash and royalties in exhange for products.
	Burroughs Wellcome Co	CytRx Corp	18.5		CA	US		2834	CytRx Corp, located in Los Angeles, California, is a biopharmaceutical company engaged in the development of high-value human therapeutics. The company owns three-clinical stage compounds based on its small-molecule "molecular chaperone" co induction technology. CytRx has a research and development facility in San Diego. The company was founded in 1985.		Burroughs Wellcome Co. acquired a worldwide license to CytRx Corp.'s RheothRx. Under the terms of the agreement, Burroughs Wellcome was licensed to develop and market RheothRx. In return, CytRx received licensing fee royalties on sales, and an initial payment. Milestone and product approval payments were dependent upon continued development of the product by Burroughs Wellcome. The agreement's es…		Burroughs-Wellcome agreed to pay CytRx an initial licensing fee, along with subsequent milestone and product approval payments, both of which were dependent upon continued developed by Burroughs. Burroughs would also take over all development costs. The licensing agreement was estimated to be worth $18.5 million. Burroughs was also supposed to make royalty payments to CytRx.
	Wellcome Foundation Ltd	Genetics Institute Inc			MA	US		2834	Provide pharmaceutical research and development services; manufacture pharmaceuticals	terminated	The Wellcome Foundation Ltd. has terminated its license from Genetics Institute, Inc. concerning the development of two clot dissolving drug candidates, tPA and NPA. Genetics Institute granted Wellcome European and North American manufacturing and marketing rights to NPA in December 1989, which followed its initial licensing of tPA in 1984. Since a jury recently decided that the tPA and NPA devel…
	Block Drug Co	Chemex Pharmaceuticals Inc	5		NY	US		2834	Manufacture prescription pharmaceuticals intended for final consumption, including biotech products and antibiotics		Chemex Pharmaceuticals Inc. signed an agreement with Block Drug Co. which calls for Block to purchase ACTINEX, a topical application of nordihydroguaiaretic acid (NDGA) for treating actinic keratoses. Chemex retained the right to develop other applications of NDGA in humans and animals. With FDA approval, which was granted in September 1992, Chemex received a $3 million payment from Block as apar…
	Glaxo Holdings PLC	Gilead Sciences Inc	20		CA	US		2836	Gilead Sciences Inc, located in Foster City, California, is a provider of biotechnology services that is specialized in HIV/AIDS, liver diseases, cardiovascular diseases, respiratory diseases and others. It operates in Canada, UK, New Zealand, Australia, Austria, Benelux, Denmark, France, Germany, Greece, Ireland, Italy, Norway, Poland, Portugal, Spain, Sweden, Switzerland and Turkey. The company…		Glaxo Holdings plc agreed to invest about $20 million in a collaboration with Gilead Sciences Inc. The five-year research program will develop the use of oligonucleotides to selectively inhibit the activity of disease-causing genes for cancer therapies. The technology involves the use of synthetic oligonucleotides to bind to specific DNA or RNA sequences to prevent the genetic materials from expr…		Glaxo provided funding for the agreement through a 6% equity stake purchase in Gilead, valued at $20 million.
	Genelabs Technologies Inc	Abbott Laboratories			IL	US		2834	Abbott Laboratories Inc, headquartered in Abbott Park, Illinois, manufactures and wholesales general pharmaceuticals and medical equipment. The company operates through its four divisions namely, Pharmaceutical Products, which offers adult and pediatric pharmaceuticals; Diagnostic Products, responsible for providing diagnostic systems and tests for blood banks, hospitals, commercial laboratories,…		Abbott Laboratories Inc. has rights to produce and market Hepatitis E Virus (HEV) immunodiagnostics based on Genelabs Inc.'s recent cloning of HEV. The firms will develop the products jointly. The agreement gives Abbott exclusive worldwide rights to the products, except in certain Asian countries where Genelabs retains co-marketing rights. In return, Abbott will provide Genelabs with development …		Abbott was to provide Genelabs with development funding and sales royalties.
	Glaxo Inc(Glaxo Holdings PLC)	Research Triangles Labs			UN	US		8734	Own and operate testing laboratories		Glaxo Inc. and Research Triangle Institute (RTI) signed an agreement that gives Glaxo exclusive worldwide development and marketing rights to camptothecin analogues, a class of anticancer compounds developed by RTI. In return, Glaxo will provide RTI with funding to support research on the compounds and will pay the institute royalties. Synthetic analogues of camptothecin have shown promise in inh…
	Wellcome Foundation Ltd	DynaGen Inc			MA	US		2835	Manufacture and wholesale diagnostic substances and pharmaceutical products for health care markets; specialize in smoking cessation products		DynaGen and Wellcome Foundation Ltd. signed an agreement to jointly develop new rapid diagnostic tests for tuberculosis. Under the terms of the agreement, Wellcome had exclusive worldwide marketing and manufacturing rights. In addition, the agreement called for Wellcome to give an initial sum, milestone payments and royalties to DynaGen.		The agreement required Wellcome to pay an initial sum, royalties, and make milestone payments to DynaGen.
	Glaxo Holdings PLC	FH Faulding & Co Ltd				Australia		2834	Manufacture pharmaceutical preparations, medicinal chemicals, botanical products, soap and other detergents, perfumes, cosmetics and other toiletries; wholesale prescription and proprietary drugs, druggists' sundries and toiletries		Glaxo Holdings, plc. and F.H. Faulding & Co., Ltd. signed an agreement to jointly develop and market Kapanol, a morphine product designed to provide relief to cancer patients. Terms were not disclosed.
Novartis	Sandoz AG	Showa Denko KK				Japan		2869	Showa Denko KK, headquartered in Tokyo, Japan, the company has five business segments. The petrochemical segment manufactures and sells olefin, organic chemicals, synthetic resins and others. The chemical product segment supplies chemicals, gases, special chemicals and functional resin, among others. The electronics and Information segment provides hard discs, compound semiconductors, rare earth …		Sandoz, Ltd. and Showa Denko K.K. signed an agreement to form SDS Biotech, K.K., a joint venture to develop, produce and market biological insecticides, including nematode-based products, in Japan.
	Sandoz AG	Schering-Plough Corp			NJ	US		2834	Schering-Plough Corp, located in Kenilworth, New Jersey, manufactures and wholesales pharmaceuticals for the treatment of cardiovascular diseases, central nervous system disorders, immunology and infectious disease, oncology, respiratory diseases and women's health. Its largest-selling products include Vytorin, Zetia, Remicade and Nasonex.		Schering-Plough Corp. and Sandoz Pharma, Ltd. signed an agreement to jointly develop and co-market 'Leucomax'(molgramostim), a granulocyte macrophage colony stimulating factor(G-CSF), used to treat cancer.
	Ciba-Geigy Ltd(Ciba-Geigy AG)	Tanox Inc			TX	US		2836	Biotechnology company		Ciba-Geigy Ltd and Tanox Biosystems formed an agreement to jointly develop monoclonal antibody products for the treatment of certain allergies. Under the agreement, the two companies merged their research efforts and shared manufacturing rights. Ciba-Geigy payed Tanox an initial undisclosed amount of money, with additional payments as product development progressed. Ciba-Geigy also acquired a min…		Ciba-Geigy was to pay Tanox Biosystems an initial undisclosed amount of money, with additional payments as product development progressed. Tanox was to receive royalties on Ciba-Geigy's sales of resulting products. Ciba-Geigy was to receive a minority equity stake in Tanox.
	Ciba-Geigy AG	Biosym Technologies Inc Bayer AG; DuPont Hoechst AG Smith & Nephew PLC			CA; De	US; Germany; UK		7372 2833; 2821 2824 3841	Develop computer aided design software' ; Bayer AG, located in Leverkusen, Germany, manufactures and wholesales chemicals and pharmaceuticals with operations in four divisions namely Healthcare, which comprises the pharmaceuticals, biological products, consumer care, animal health and diagnostics divisions; Crop Science, which develops and sells fungicides, herbicides, insecticides and seed treat…		Biosym Technologies Inc, a unit of Corning Inc, and 27 other international industrial and chemical companies have formed a consortium to develop software to be used in the manufacture of polymer-based products. Among the companies involved were: Bayer AG, Ciba-Geigy AG, EI du Pont de Nemours & Co (Du Pont), Hoechst AG, a subsidiary of Friedrich Krupp GmbH, and Smith & Nephew. Financial terms were…
	Geneva Generics(Ciba-Geiby)	Marsam Pharmaceuticals Inc			NJ	US		2834	Manufacture generic drug products		Marsam Pharmaceuticals Inc (MP) and Geneva Generics Inc (GG) formed a strategic alliance to manufacture and wholesale generic drugs in the United States. The alliance called for MP to develop generic injectable products, and for GG to develop oral solid-dose drugs. GG was expected market and distribute both types of products.
	Ciba-Geigy AG	Tanox Inc			NJ	US		2834	Manufacture, develop and wholesale pharmaceutical and chemical products including medicinal, organic and agricultural chemicals, paints		Ciba-Geigy and Tanox Biosystems agreed to develop jointly anti-allergic agents. As part of the agreement, Ciba-Geigy acquired a minority stake in Tanox Biosystems, the manufacturer of biological products. Ciba-Geigy was a developer and wholesaler of pharmaceutical and chemical products.
	Ciba-Geigy AG	Olin Hunt Speciality Products	70		NJ	US		3861	Manufacture photographic chemicals, electrostatic toners and developers, electronic chemicals and etching equipment	terminated	On August 25, 1995, Ciba-Geiby AG announced that it had sold its 50% interest in the joint venture to its partner, thereby terminating the alliance. Originally, A subsidiary of Olin Corp., Olin Hunt Specialty Products, and Ciba-Geigy AG have combined their microelectronics businesses in a 50/50 joint venture to develop, manufacture and market photoresists and polyimides, both materials used in th…		As part of the joint venture deal, Olin was to receive $70 mil US from Ciba-Geigy, to be used for general corporate purposes. Each company was to have equal stakes in the venture.
	Ciba-Geigy Ltd(Ciba-Geigy AG)	Isis Pharmaceuticals Inc	30	0.1	CA	US		2836	Biotechnology company		Isis Pharmaceuticals and Ciba-Geigy have agreed to extend their joint research and development agreement. Originally, Isis Pharmaceuticals signed an agreement with Ciba-Geigy Ltd. under which Ciba-Geigy committed more than $30 million to a five-year joint research program with Isis aimed at the discovery of novel drugs based on antisense oligonucleotides. The program will focus on four molecular …		Ciba-Geigy was to pay Isis royalties on sales outside the United States. Ciba was to provide Isis with $25 million in research funding and was to invest $5 million in the company.
	Chiron Corp	Takeda Pharmaceutical Co Ltd				Japan		2834	Takeda Pharmaceutical Co Ltd, located in Osaka, Japan, manufactures and wholesales pharmaceutical products. It operates through the following divisions: Pharmaceuticals and Others. Pharmaceuticals include drugs, medicine, research and general health care products. Other operations include vitamin products, beverages and health foods. The Group operates in Austria, Belgium, Brazil, Canada, China, …		Chiron Corp and Takeda Chemical Industries signed a collaborative development agreement for Japan for SOD, which are therapeutic enzymes alpha-1 antitrypsin, tPA, and fibronectin. The enzymes are used for kidney transplantation and osteoarthritis.
Sanofi-Aventis	Rhone-Poulenc SA Elvetium	Elvetium			FF FF	France Argentina	Licensing Services Marketing Services Manufacturing Services	2834	Manufacture chemical products Manufacture pharmaceuticals	Terminated	Rhone-Poulenc Rorer SA terminated its licensing agreement with Elvetium. Originally, Rhone-Poulenc Rorer SA, a unit of French state-owned Rhone-Poulenc SA, and Elvetium entered into a licensing agreement in which Elvetium received a license to manufacture and market Rhone-Poulenc Rorer's pharmaceuticals in Argentina. Financial terms were not disclosed. On February 17, 1995, Rhone-Poulenc Rorer bo…	No	Product sales in 1994 totaled $19.4 mil US (100 mil French francs/19.4 mil Argentinean pesos).	Argentina
	Hoechst AG	Sankyo Co Ltd Yamanouchi Pharmaceutical Co Kyowa Hakko Kogyo Co Ltd Nippon Krea Test Animal Central Lab Chugai Pharmaceutical Co Ltd	4	14.30 14.30 14.30 14.30 14.30 14.30 14.30	FF FF FF FF FF FF FF	Japan Japan Japan Japan Japan Japan Japan	Research & Development Services	0279	Sankyo Co Ltd, headquartered in Tokyo, Japan, is engaged in the manufacture and distribution of pharmaceuticals and agrochemicals. Manufacture prescription pharmaceuticals intended for final consumption, including biotech products and antibiotics Produce proteins from gene modification, as well as other manmade organic fibers; wholesale drugs and chemicals Kyowa Hakko Kogyo Co Ltd, headquartered …		Seven Japanese companies have formed a joint venture, called DNARD, to develop transgenic animals with specific disorders to use in research. The seven companies were: Sankyo Co Ltd, Yamanouchi Pharmaceutical Co Ltd, Hoechst Japan Ltd, a unit of Friedrich Krupp's Hoescht AG, Kyowa Hakko Kogyo Co Ltd, Nippon Krea, Test Animal Central Lab, and Chugai Pharmaceutical Co Ltd.	Yes	The seven companies invested $4 mil US (577.6 mil Japanese yen) in the joint venture company.	Japan
	Hoechst AG	Biosym Technologies Inc Bayer AG Ciba-Geigy AG DuPont Hoechst AG Smith & Nephew PLC			CA FF FF DE FF FF	United States Germany Switzerland United States Germany United Kingdom	Research & Development Services	7372	Develop computer aided design software Bayer AG, located in Leverkusen, Germany, manufactures and wholesales chemicals and pharmaceuticals with operations in four divisions namely Healthcare, which comprises the pharmaceuticals, biological products, consumer care, animal health and diagnostics divisions; Crop Science, which develops and sells fungicides, herbicides, insecticides and seed treatmen…		Biosym Technologies Inc, a unit of Corning Inc, and 27 other international industrial and chemical companies have formed a consortium to develop software to be used in the manufacture of polymer-based products. Among the companies involved were: Bayer AG, Ciba-Geigy AG, EI du Pont de Nemours & Co (Du Pont), Hoechst AG, a subsidiary of Friedrich Krupp GmbH, and Smith & Nephew. Financial terms were…	No		Supranational
	Pharmacia SpA Hoechst AG Cambridge BioScience Corp	Pharmacia AB(Pharmacia SpA) Behringwerke AG(Hoechst AG) Cambridge BioScience Corp			FF FF MA	Sweden Germany United States	Licensing Services	6794	Manufacture and develop pharmaceuticals, ophthalmic and medical diagnostic products Manufacture and wholesale medicinal chemicals Biotechnology company		Cambridge Biotech Corp., the exclusive licensee of the protein gp120, sublicensed to Behringwerke AG and Pharmacia ENI Diagnostics for diagnostic use. The protein is a key envelope protein in the AIDS virus. The protein had previously been licensed to Cambridge Bio from Harvard University.	No		Supranational
	Osothsapha(Tech Heng Yoo)Co Rhone-Poulenc SA	Osothsapha(Tech Heng Yoo)Co Rhone-Poulenc SA		50.00 50.00	FF FF	Thailand France	Manufacturing Services	2834	Manufacture pharmaceutical preparations, bottled and canned soft drinks and carbonated waters, and candy and confectionery products Manufacture industrial chemicals, cosmetics, insecticides, cleaning preparations and fibers		To manufacture analgesic in Thailand. In February 1989, Rhone-Poulenc acquired Monsanto's equity interest in the venture.	Yes		Thailand
	Rhone-Poulenc SA Rhone-Poulenc SA Optimal Pharmacy	Pasteur Merieux(Inst Merieux) Institut Merieux SA Immune Response Corp			FF FF CA	France France United States	Research & Development Services	8731	Manufacture and develop vaccine drugs Manufacture vaccines, chemicals, pharmaceuticals, agricultural chemicals, synthetic fibers, and polyester film Provide and develop products that stimulate and regulate the immune system in order to treat life threatening and crippling diseases, such as therapies to induce specific immune responses for the treatment of HIV, autoimmune diseases and cancer		The Immune Response Corp, Institute and Pasteur Vaccines formed a strategic alliance to provide research and development services of AIDS vaccines and therapeutics medicines globally.	No		Supranational
	Genzyme Corp	DNX Inc			MA NJ	United States United States	Research & Development Services	8731	Genzyme Corp, located in Cambridge, Massachusetts, is a biotechnology company operating through 5 segments: Renal, Therapeutics, Transplant, Biosurgery, and Genetics. The Renal segment manufactures, and distributes products that treat patients suffering from renal diseases. The Therapeutics segment provides Cerezyme/Ceredase, an enzyme replacement therapy for the treatment of Gaucher disease; Fab…		DNX and Genzyme Corp formed a strategic alliance to provide research and development services of DNA microinjection technology from using transgenic animals in the United States.	No	DNX will receive from Genzyme annual fees and royalties from the sale of these pharmaceuticals produced through transgenic livestock.	United States
	Immunex Corp Hoechst AG	Immunex Corp Behringwerke AG(Hoechst AG)			WA FF	United States Germany	Licensing Services Marketing Services Manufacturing Services	2836	Biotechnology company, focusing on the research and manufacturing of immunological therapeutic products Manufacture and wholesale medicinal chemicals		Immunex Corp. granted Behringwerke AG the right to manufacture and market soluble receptor products in Japan in exchange for $3 million now and $7.3 million later, plus royalties. The receptors are recombinant versions of protein therapeutics which disable the human immune system during the treatment of rheumatoid arthritis, allergies, asthma, and diabetes. The two companies also completed four a…	No	Behringwerke was to pay Immunex $3 million upfront and $7.3 million later plus royalties on the sale of the products.	United States
	Lucky-Goldstar Group Hoechst AG	Lucky Ltd Hoechst AG		50.00 50.00	FF FF	South Korea Germany	Manufacturing Services	2821	Manufacture chemicals Manufacture textile and technical fibers, acetate cigarette filter tow, specialty and bulk chemicals, prescription drugs, veterinary pharmaceuticals, animal feed additives, crop protection products, engineered plastics, polyester film, resins, high density polyethylene, presensitized offset printing plates, dyes and pigments, paints, coatings and sealants; wholesale chemical…	Terminated	Lucky Ltd. and Hoechst AG terminated their joint venture, Lucky-Hoechst Ltd., when Lucky acquired Hoechst's 50% stake in the venture for 3 billion Korean won ($3.89 million). The plant was due to come on line in the summer of 1992. Hoechst's sale of the stake was consistant with its current strategy to concentrate its high-density polyethylene (HDPE) business in Europe. Lukcy-Hoechst was formed i…	Yes	Lucky Hoechst was initially capitalized at 18 billion Korean won ($23.4 million). In February 1992, Lucky acquired Hochest's 50% interest in Lucky Hoechst for 3 billion Korean won($3.9 million). Lucky Hoechst was pro rata valued at $7.8 million.	Japan
	InnoVet Inc Hoechst AG	InnoVet Inc American Hoechst Corp(Hoechst)			FL NJ	United States United States	Research & Development Services	2836	Manufacture pharmaceutical, biological and diagnostic products that address human and animal health needs, with extensive research and development activities Manufacture chemicals, pharmaceuticals, plastics, and fibers		Innovet Inc and American Hoechst, a subsidiary of Hoechst AG, formed a strategic alliance in which both companies agreed to research and develop microdroplet technology. The technology had applications in drug-delivery for human and veterinary medicines as well as biological research. Financial terms were not disclosed.	No		United States
	Rhone-Poulenc SA Hercules Inc	Rhone-Poulenc SA Hercules Advanced Materials			FF DE	France United States	Marketing Services	8742	Manufacture industrial chemicals, cosmetics, insecticides, cleaning preparations and fibers Manufacture industrial chemicals		Hercules Advanced Materials & Systems Company agreed to cooperate with Rhone-Poulenc SA to develop, market and sell ceramic fibers. Hercules received an exclusive license to market Rhone-Poulenc's Fiberamic, a siliconcarbonitride fiber, in North America. Fiberamic was used to reinforce ceramic, metal, or high-temperature polymeric matrix composites such as those found in hypersonic aircrafts and …	No		Supranational
	Genzyme Corp British Petroleum Co PLC	Genzyme Corp Amoco Biotechnology		50.00 50.00	MA IL	United States United States	Manufacturing Services	2836	Genzyme Corp, located in Cambridge, Massachusetts, is a biotechnology company operating through 5 segments: Renal, Therapeutics, Transplant, Biosurgery, and Genetics. The Renal segment manufactures, and distributes products that treat patients suffering from renal diseases. The Therapeutics segment provides Cerezyme/Ceredase, an enzyme replacement therapy for the treatment of Gaucher disease; Fab…	Terminated	To manufacture biological products. In June 1990, Hoechst, terminated its previous agreement to acquire GENE-TRAK Systems.	Yes		United States
	Hoechst AG Biomira Inc	Behringwerke AG(Hoechst AG) Biomira Inc			FF FF	Germany Canada	Licensing Services Marketing Services	2835	Manufacture and wholesale medicinal chemicals Biotechnology company		Behringwerke AG and Biomira signed a licensing agreement for Biomira's MAbs. Biomara's product is used to diagnose and monitor ovarian cancer. Biomira will receive an undisclosed amount of royalties based on a percent of net sales by Behringwerke.	No		Germany Canada
	Toray Industries Inc Roussel-Uclaf SA	Toray Industries Inc Roussel-Uclaf SA			FF FF	Japan France	Licensing Services Marketing Services Manufacturing Services Supply Services Exclusive Licensing Services	2834	Toray Industries Inc, headquartered in Tokyo, Japan, is engaged in the manufacture and wholesale of textile. The company operates in seven business segments. The textile segment manufactures, processes and sells textile and apparel products. The plastic and chemical segment offers plastic, films and chemical products. Information communication materials and equipment segment offers plastic, films…		Toray Industries has signed a licensing agreement with Roussel-Uclaf SA which gave Roussel-Uclaf exclusive rights to market beraprost sodium in France and Europe. Beraprost sodium was the main ingredient in an experimental oral drug developed by Toray for the treatment of cardiovascular disorders. Roussel-Uclaf was to clinically test beraprost sodium for the treatment of peripheral circulation pr…	No		France
	Drew Chemical Rhone-Poulenc SA	Drew Chemical Donau Chemie A		50.00 50.00	NJ FF	United States Austria	Marketing Services	9511	Manufacture industrial chemicals Manufacture gypsum products, phosphate fertilizer, and other chemical preparations		Drew Chemical and Donau Chemie formed a joint venture, Donau Drew, to market Drew's antifoam agents, wastewater treatment, and other chemicals to the paper and cellulose industries in Austria and Eastern Europe.	Yes		Supranational
	Himedics Inc Fisons PLC	Himedics Inc Fisons Corp(Fisons PLC)			FL MA	United States United States	Licensing Services Marketing Services Supply Services Funding Services Exclusive Licensing Services	6794	Manufacture prescription pharmaceuticals intended for final consumption, including biotech products and antibiotics Wholesale pharmaceuticals		Fisons Corp (FC) and Himedics Inc (HI) formed a strategic alliance wherein HI licensed FC to market and distribute five pharmaceutical products under development utilizing the Himedics delivery system: erythromycin, acetaminophen, amoxicillin, dicloxacillin, and prednisone in the United States. Under terms of the agreement, FC was expected to pay license fees of $3.5 million, including initial an…	No	Fisons Corp was expected to pay license fees, milestone payments, and sales royalties of $3.5 million.	United States
	Fujisawa Pharmaceutical Co Ltd Fisons PLC	Fujisawa Pharmaceutical Co Ltd Fisons PLC		35.00 65.00	FF FF	Japan United Kingdom	Marketing Services Manufacturing Services	2834	The Group's principal activity is the manufacture, marketing and import and export of pharmaceuticals. Its operations also include quasi-drugs, foods and medical supplies and systems and home care business. The operations are carried out through the following divisions: Pharmaceuticals and Other. The Pharmaceuticals division includes circulatory and respiratory agents, digestive agents and hormon…		To manufacture and wholesale pharmaceutical products. In June 1990, Fisons increased its interest from 50% to 65% by acquiring an additional 15% from Fujisawa. Fisons planned to oversee the venture's expansion through the introduction of new drugs like Tilade and Dopacard, which are expected to be launched by the venture in the mid-1990s.	Yes		Japan
	HCS Technology NV Hoechst AG	Savin Corp(HCS Technology NV) Hoechst AG		50.00 50.00	CT FF	United States Germany		5112	Manufacture photo-copiers and other office automation equipment Manufacture textile and technical fibers, acetate cigarette filter tow, specialty and bulk chemicals, prescription drugs, veterinary pharmaceuticals, animal feed additives, crop protection products, engineered plastics, polyester film, resins, high density polyethylene, presensitized offset printing plates, dyes and pigments, paints,…		To distribute office equipment worldwide.	Yes		United States
	Roussel-Uclaf SA ImmunoGen Inc	Roussel-Uclaf SA ImmunoGen Inc			FF MA	France United States	Licensing Services Research & Development Services Marketing Services	6794	Manufacture pharmaceutical, chemical, and veterinary products ImmunoGen Inc, headquartered in Waltham, Massachusetts, is a pharmaceuticals company targeting anticancer therapeutics. The company develops cancer-cell killing agents attached to antibodies for targeted delivery to tumor cells. The company was incorporated in Massachusetts in March 1981.		ImmunoGen Inc granted Roussel Uclaf an exclusive European license to anti-B4-blocked Ricin, a monoclonal antibody-toxin conjugate used to treat non-Hodgkin's lymphoma and other B-cell diseases. The deal required the approval of Roussel Uclaf's supervisory board. Roussel-Uclaf paid ImmunoGen a $2.1 million initial licensing fee for the drug, later named Oncolysin B. In September 1991, Roussel-Ucla…	No	Roussel-Uclaf paid ImmunoGen a $2.1 million initial licensing fee, and was purchasing Oncolysin B from ImmunoGen for use in the clinical trials.	Supranational
	Rhone-Poulenc SA New York University	Rhone-Poulenc Rorer Inc New York University			PA NY	United States United States	Licensing Services Research & Development Services Funding Services	8731	Manufacture pharmaceuticals for heart disease, strokes, hypertensive diseases and other cardiovascular diseases, infectious diseases and AIDS, depression, Alzheimer's disease and memory disorders, anxiety and panic, sleep disorders, Schizophrenia, migraines, and other central nervous system disorders and pain, beta-2 stimulants and inhaled steroids for asthma, intranasal steroids and antihistamin…		New York University and Rorer Inc. have agreed to collaborate on research of growth factors and their receptors. In exchange for rights to all inventions that result from the research, Rorer will provide funding for a three-year period.	No
	Genzyme Corp Chisso Corp	GENE-TRAK Systems Chisso Corp			MA FF	United States Japan	Licensing Services Marketing Services		Manufacture biological products Chisso Corp, headquartered in Tokyo, Japan, is engaged in the manufacture and wholesale of chemicals, fibers and electronic products. The company was founded in 1906.		Chisso Corp. has obtained a non-exclusive sales and marketing license in Japan for GENE-TRAK Systems' nucleic acid probe-based diagnostic product line. The food diagnostic products test food for food-borne pathogens and infectious disease.	No
	Genzyme Corp Children's Medical Center Corp	IG Laboratories Inc Children's Medical Center Corp			MA MA	United States United States	Licensing Services	6794	Own and operate medical laboratories Children's hospital		IG laboratories received an exclusive worldwide license for new fetal cell sampling techniques developed by the Children's Medical Center. Developed by a team headed by Dr. Diana Bianchi, the new process isolates fetal red blood cells from maternal blood. This allows sex determination and early detection of fetal abnormalities through a routine blood sample, thereby eliminating the risks of misca…	No		Supranational
	Roussel-Uclaf SA ImmunoGen Inc	Roussel-Uclaf SA ImmunoGen Inc			FF MA	France United States	Marketing Services	8742	Manufacture pharmaceutical, chemical, and veterinary products ImmunoGen Inc, headquartered in Waltham, Massachusetts, is a pharmaceuticals company targeting anticancer therapeutics. The company develops cancer-cell killing agents attached to antibodies for targeted delivery to tumor cells. The company was incorporated in Massachusetts in March 1981.		Roussel Uclaf's supervisory board approved a previously announced licensing agreement with ImmunoGen Inc. Under the terms of the accepted agreement, Roussel receives exclusive European marketing rights to ImmunoGen's Oncolysin B. Oncolysin B is a monoclonal antibody-toxin conjugate used in the treatment of Non-Hodgkin's Lymphoma and other B-cell diseases. ImmunoGen retains manufacturing rights to…	No		Supranational
	Rhone-Poulenc SA Osothsapha(Tech Heng Yoo)Co	Rhone-Poulenc Inc Osothsapha(Tech Heng Yoo)Co		50.00 50.00	NJ FF	United States Thailand		2816	Manufacture herbicides, insecticides, animal feed additives, aroma chemicals, silicones, plastics and packaging film; Phosphate mining Manufacture pharmaceutical preparations, bottled and canned soft drinks and carbonated waters, and candy and confectionery products		To produce paracetamol. The annual capacity of the venture was expected to be 900 tons.	Yes		Thailand
	Rhone-Poulenc SA Isis Pharmaceuticals Inc	Rhone-Poulenc SA Isis Pharmaceuticals Inc			FF CA	France United States	Research & Development Services	8731	Manufacture industrial chemicals, cosmetics, insecticides, cleaning preparations and fibers Biotechnology company		ISIS Pharmaceuticals signed a cooperative agreement with Rhone-Poulenc SA. ISIS and Rhone-Poulenc will jointly discover and develop novel antisense oligonucleotides as potential human therapeutics with respect to the inhibition of the RAS oncogene. ISIS will receive research funding, milestone payments, domestic codevelopment rights and royalties on sales. Rhone-Poulenc will receive exclusive wor…	No		Supranational
	Mitsubishi Kasei Corp Hoechst AG	Mitsubishi Kasei Corp Hoechst AG		49.00 51.00	FF FF	Japan Germany	Manufacturing Services	2821	Mitsubishi Kasei Corp, headquartered in Tokyo, Japan, is engaged in the manufacture of synthetic organic fibers, industrial chemicals, pharmaceuticals, petroleum and aluminum products, and electronic products. Manufacture textile and technical fibers, acetate cigarette filter tow, specialty and bulk chemicals, prescription drugs, veterinary pharmaceuticals, animal feed additives, crop protection …		Mitsubishi Kasei Corp (MKC) and Hoechst AG (HA) formed a joint venture named Hoechst Daifoil (HD) to produce polyethylene terephtalate(PET) film used for magnetic tape applications. The joint venture was to operate as Hoechst Diafoil Corp in Greer, South Carolina, United States; as Hoechst Diafoil GmbH in Wiesbaden, Germany; and as Hoechst Diafoil Co Ltd in Japan and Indonesia. HA held a 51% inte…	Yes	The joint venture was capitalized at $81.5 mil US (11.37 bil Japanese yen).	Supranational
	Orion Genzyme Corp	Orion Diagnostica(Orion Corp) GENE-TRAK Systems			FF MA	Finland United States	Retail & Wholesale Services	5047	Manufacture diagnostics; provide medical testing services Manufacture biological products		GENE-TRAK Systems and Orion Diagnostica entered into an exclusive distribution agreement whereby GENE-TRAK will distribute Orion's Hygicult agar slide test kits for Total Plate Count, Yeasts and Fungi, and Enterobacteriaceae throughout the U.S. Hygicult kits are specifically designed for the monitoring of microbiological hygiene and are widely used in the food industry.	No		United States
	Genzyme Corp Undisclosed JV Partner	Genzyme Corp Undisclosed JV Partner		25.00 75.00	MA FF	United States Unknown		2836	Genzyme Corp, located in Cambridge, Massachusetts, is a biotechnology company operating through 5 segments: Renal, Therapeutics, Transplant, Biosurgery, and Genetics. The Renal segment manufactures, and distributes products that treat patients suffering from renal diseases. The Therapeutics segment provides Cerezyme/Ceredase, an enzyme replacement therapy for the treatment of Gaucher disease; Fab…		To produce pharmaceutical proteins via a high-yield transgenic animal system Genzyme is currently developing. The venture was expected to hold Genzyme's exclusive East Asian production license to the process and European and East Asian marketing rights to proteins it generates. The agreement stipulated Genzyme would receive US$5.9 mil in research support plus milestone payments for development wo…	Yes	The Japanese shareholders initially were expected to contribute US$4 mil the first year, then US$3 mil annually over the following three years.	Japan
	Undisclosed Japanese Co(s) Genzyme Corp	Undisclosed Japanese Co(s) Genzyme Corp		75.00 25.00	FF MA	Japan United States	Research & Development Services Marketing Services Licensing Services	2836	Investment holding company Genzyme Corp, located in Cambridge, Massachusetts, is a biotechnology company operating through 5 segments: Renal, Therapeutics, Transplant, Biosurgery, and Genetics. The Renal segment manufactures, and distributes products that treat patients suffering from renal diseases. The Therapeutics segment provides Cerezyme/Ceredase, an enzyme replacement therapy for the treatm…		Genzyme Corp. agreed to form a joint venture with unidentified Japanese partners to develop and sell pharmaceutical proteins produced by transgenic animals in Japan. Under the pact, Genzyme will own 25% of the venture, and the Japanese partners will own 75%. Initial investment in the new company will be about $4 million, followed by an additional $3 million over three years. Genzyme will receive …	Yes		Japan
	Montedison SpA Hoechst AG	HIMONT Inc(Montedison SpA) Hoechst AG			DE FF	United States Germany	Licensing Services Research & Development Services Marketing Services	2821	Manufacture polypropylene resins Manufacture textile and technical fibers, acetate cigarette filter tow, specialty and bulk chemicals, prescription drugs, veterinary pharmaceuticals, animal feed additives, crop protection products, engineered plastics, polyester film, resins, high density polyethylene, presensitized offset printing plates, dyes and pigments, paints, coatings and sealants; wholesa…		HIMONT licensed its Addipol additive technology to Hoechst as part of a development pact between the two companies. Under the agreement, the companies were to work together to improve the Addipol technology and other resin-related technology for formulated unpelletized polypropylene and related products. The companies agreed to independently market and sell any products that resulted from the col…	No		Germany
	Groupe Limagrain SA Hoechst AG	BioTechnica International Inc Wacker-Chemie GmbH			KS FF	United States Germany	Research & Development Services Funding Services	8731	Manufacture periodontal disease diagnostic products; research and develop genetically engineered plants and microbial inoculants Manufacture chemical preparations		BioTechnica International and Wacker-Chemie began a project to develop genetically engineered microbial systems for the production of fine chemicals such as vitamins and amino acids as nutritional supplements. The agreement called for Wacker to invest $6 million in funding through its subsidiary, the Consortium fuer Electrochemische Industrie, and to pay royalties to BioTechnica on the sales of t…	No	Under the agreement, Wacker was to pay $6 million in funding to the agreement through its subsidiary, the Consortium fuer Electrochemische Industrie. Wacker also agreed to pay royalties on any product sales.	Supranational
	Genetrix Inc Clinical Pathology Facility	Genetrix Inc Clinical Pathology Facility			AZ PA	United States United States	Marketing Services		Provide genetic testing services Own and operate medical laboratories		Clinical Pathology Facility, Inc. (CPF) and Genetrix Inc. have signed an agreement which will allow Genetrix to exclusively market its medical genetics and molecular oncology testing services at CPF's thirty independent medical reference laboratories. CPF made a significant equity investment in Genetrix as part of the agreement. The investment terms and the amount of equity purchased were not dis…	No
	SangStat Medical Corp Centre de Transplantation	SangStat Medical Corp Centre de Transplantation		50.00 50.00	CA FF	United States France	Research & Development Services	2836	Manufacture suppressant drugs for organ transplant patients Provide organ transplant services		SangStat Medical Corp. and the Centre de Transplantation d'Organes have formed a joint venture to research and develop new therapeutic immunosuppressive products that will increase the success of organ transplants. The new company, Lynatech, was to utilize the pooled resources of the two organizations to produce immunosuppressive products that specifically control only those immune activities tha…	Yes		France
	Upjohn Co Hoechst AG	Upjohn Co-Polymer Chemical Hoechst-Roussel Pharm			MI NJ	United States United States	Marketing Services	8742	Manufacture polymer chemicals Manufacture and wholesale pharmaceuticals		Hoechst-Roussel Pharmaceuticals and Upjohn Co. signed a ten-year comarketing agreement concerning Hoechst's Surfak and Doxidan over-the-counter laxatives. Upjohn, which also received an option to acquire the two drugs, felt that the two would help increase its presence in the over-the-counter drug market, where it already successfully marketed the anti-diarrheal Kaopectate.	No		United States
	Rhone-Poulenc SA Optimal Pharmacy	Rhone-Poulenc Rorer Inc Immune Response Corp		8.90 91.10	PA CA	United States United States	Funding Services	2836	Manufacture pharmaceuticals for heart disease, strokes, hypertensive diseases and other cardiovascular diseases, infectious diseases and AIDS, depression, Alzheimer's disease and memory disorders, anxiety and panic, sleep disorders, Schizophrenia, migraines, and other central nervous system disorders and pain, beta-2 stimulants and inhaled steroids for asthma, intranasal steroids and antihistamin…		Rhone-Poulenc Rorer has pulled out of its biotech joint venture it had formed with Immune Response. Originally, Rhone-Poulenc Rorer and The Immune Response Corp.(IRC) signed an agreement to form Immunization Products, Ltd.(IP), a joint venture to determine the ability of the HIV therapeutic vaccine to stimulate an immune response at several dosage levels. IP was currently sponsoring Phase II/III …	Yes	In May 1992, the partners agreed to invest an additional $9 million each in Immunization Products. Following the May 1992 commitment, the partners will have contributed a total of $36 million in capital to Immunization Products. On July 11, 1994, the partners agreed to invest an additional $5 mil US each into the joint venture. Following this investment, the partners will have contributed a total…	United States
	Ethyl Corp Rhone-Poulenc SA France	Ethyl Corp Rhone-Poulenc SA EMC SA		65.00 35.00	VA FF FF	United States France France	Manufacturing Services	2819	Manufacture and wholesale performance-enhancing fuel and lubricant additives including poly alpha olefins, alpha olefins, fatty alchols, organoaluminum compounds, anti-oxidants, aluminum alkyls, tertiary amines, zeolite A, brominated flame retardants, lubricant and fuel additives, transmission fluid additives, fine chemicals for crop protection use, polyimide flame-retardant foams, bulk ibuprofen…	Terminated	In November 1992, Ethyl Corp announced that it planned to acquire PPC from its participants by the end of the year. Rhone-Poulenc disclosed that PPC, though profitable, was not part of its future strategy. Rhone-Poulenc and French state-owned Entreprise Miniere et Chimique formed a joint venture called Potasse et Produits Chimiques (PPC) to produce inorganic bromine compounds for the photographic…	Yes	Ethyl Corp. was going to purchase PPC for $100 million. PPC reported $117 million (FFr586 million) in revenues for 1991.	France
	SangStat Medical Corp Roche Holding AG	SangStat Medical Corp Roche Products			CA FF	United States India	Marketing Services	5122	Manufacture suppressant drugs for organ transplant patients Manufacture pharmaceuticals		SangStat Medical Corp and Roche Products Ltd, a subsidiary of Hoffmann-La Roche Inc, have entered into an agreement in which Roche Products received French marketing rights to SangStat's pregnancy diagnostic kits. Financial terms of the agreement were not disclosed.	No		France
	Rhone-Poulenc SA Porton International PLC	Armour Pharmaceuticals(Rhone) Porton International PLC			FF FF	France United Kingdom	Marketing Services	5122	Manufacture pharmaceutical products Manufacture and wholesale chemicals; holding company		Armour Pharmaceuticals signed a long-term agreement with Porton International to market Porton's Hyate:C (porcine Factor VIII:C) used in the treatment of hemophiliac patients whose systems were resistant to Factor VIII:C products. Hyate:C complemented Armour's human Factor VIII:C, which was marketed as Monoclonate-P.	No		United States
AstraZeneca	US Bioscience Inc Teva Pharmaceutical Industries	US Bioscience Inc Teva Pharmaceutical Industries			PA FF	United States Israel	Licensing Services	6794	Manufacture pharmaceuticals; provide research services Teva Pharmaceutical Industries Ltd, headquartered in Tikva, Israel, manufactures and wholesales pharmaceutical products. It specializes in the development, production and marketing of generic and proprietary branded pharmaceuticals as well as active pharmaceutical ingredients. It has production facilities in Israel, North America, Europe and …		Teva Pharmaceutical Industries Ltd. has obtained the marketing rights in Israel, East Europe, and parts of Africa for U.S. Bioscience's Hexalon, an oral agent for advanced ovarian cancer that increases survival rates when combined with certain other therapies. FDA approval was pending. USB has also granted Teva options to market five developmental-stage drugs in the same regions. Among the new dr…	No		Supranational
	US Bioscience Inc FH Faulding & Co Ltd	US Bioscience Inc David Bull Laboratories Pty			PA FF	United States Austria	Marketing Services	6794	Manufacture pharmaceuticals; provide research services Manufacture pharmaceuticals and drugs		U.S. Bioscience, Inc. and David Bull Laboratories Pty. Ltd. (DBL) signed an agreement which will grant DBL marketing rights in Australia and New Zealand for Hexalen, an oral drug for the treatment of advanced ovarian cancer. The agreement provides DBL with the option to acquire rights to five additional anticancer drugs still in the development stage at U.S. Bioscience. DBL provides licensing fee…	No	DBL provided licensing fees and royalties to U.S. Bioscience.	Supranational
	Georgetown University US Bioscience Inc	Georgetown University US Bioscience Inc			DC PA	United States United States	Licensing Services Exclusive Licensing Services	5122	Own and operate college and university Manufacture pharmaceuticals; provide research services		US Bioscience Inc, a subsidiary of US Healthcare Inc, and Georgetown University have entered into a licensing agreement in which US Bioscience received exclusive worldwide rights to Georgetown's anti-cancer compounds known as mitomycin analogues. The two partners also agreed to extend their relationship for another three years. Financial terms were not disclosed.	No		United States
	MedImmune Inc Connaught Biosciences Inc	MedImmune Inc Connaught Laboratories Ltd			MD FF	United States Canada	Marketing Services	8742	Manufacture vaccines which include Synagis (palivizumab), Ethyol (amifostine), FluMist (Influenza Virus Vaccine Live, Intranasal), and CytoGam (cytomegalovirus immune globulin intravenous (human)) and with additional products in clinical testing; provide research and development services to discover, develop, manufacture and market products that treat or prevent infectious disease, cancer and inf…		Med-Immune Inc and Connaught Laboratories formed a strategic alliance to provide marketing services worldwide. Connaught was given exclusive worldwide marketing rights to products derived from Med-Immune's recombinant bacillus calmetta and guerin (BCG) vector vaccine technology.	No		Supranational
	MedImmune Inc Connaught Biosciences Inc	MedImmune Inc Connaught Laboratories Inc			MD PA	United States United States	Retail & Wholesale Services	5122	Manufacture vaccines which include Synagis (palivizumab), Ethyol (amifostine), FluMist (Influenza Virus Vaccine Live, Intranasal), and CytoGam (cytomegalovirus immune globulin intravenous (human)) and with additional products in clinical testing; provide research and development services to discover, develop, manufacture and market products that treat or prevent infectious disease, cancer and inf…		Med-Immune, Inc and Connaught Laboratories Inc formed a strategic alliance to wholesale cytomegalovirus intravenous immunoglobulin product, CytoMune-IV, worldwide. Med-Immune developed the product for the treatment of primary cytomegalovirus disease, which patients contract as a result of kidney transplantation. The product has been cleared by the Food and Drug Administration and will be commerci…	No		Supranational
Abbott	Abbott Laboratories American Home Products Corp	Ross Laboratories Lederle Labs(Amer Cyanamid Co)			IL NJ	United States United States	Marketing Services	8742	Manufacture pharmaceuticals Provide medical research services		Lederle and Ross Laboratories formed a strategic alliance to co-market Lederle's oral cephalosporin, SUPRAX in the United States. Lederle and Ross will combine sales forces to better market the oral antibiotic to pediatricians and physicians with large pediatric practices.	No		United States
	Molecular Devices Corp Abbott Laboratories	Molecular Devices Corp Abbott Laboratories			CA IL	United States United States	Marketing Services	8742	Manufacture analytical laboratory instruments Abbott Laboratories, headquartered in Abbott Park, Illinois, manufactures and wholesales general pharmaceuticals and medical equipment. The company operates through its four divisions namely, Pharmaceutical Products, which offers adult and pediatric pharmaceuticals; Diagnostic Products, responsible for providing diagnostic systems and tests for blood …		Molecular Devices Corp and Abbott Laboratories Inc formed a strategic alliance to provide marketing services of silicon-based biosensor microscope and human diagnostic applications devices in the United States.	No	Abbott is obligated to pay a licensing fee and royalties to Molecular Devices Corp.	United States
	Unimed Pharmaceuticals Inc CH Boehringer Sohn AG & Co KG	Unimed Pharmaceuticals Inc Roxane Laboratories Inc			NJ OH	United States United States	Research & Development Services	2836	Manufacture pharmaceuticals Manufacture pharmaceutical products	no alliance	Roxane Laboratories, a subsidiary of Boehringer Ingleheim, began a research and development project for Marinol (dronabinol), a drug used in the treatment of anorexia and weight loss associated with HIV infection. Studies to assess the drug's efficacy and side effects were conducted at the University of California School of Medicine in San Francisco and at the University of Missouri School of Med…	No		United States
	IDEC Pharmaceuticals Corp Abbott Laboratories	Biogen Inc Abbott Laboratories			MA IL	United States United States	Licensing Services Manufacturing Services Marketing Services	3841	Manufacture genetically engineered human pharmaceuticals; provide pharmaceutical research and development services for the treatment of inflammation, thrombosis, virology and selected cancers Abbott Laboratories, headquartered in Abbott Park, Illinois, manufactures and wholesales general pharmaceuticals and medical equipment. The company operates through its four divisions namely, Pharmaceutical …		Biogen, Inc. granted Abbott Laboratories Inc. a non-exclusive, worldwide license to manufacture, use, and commercialize diagnostic test kits based on recombinant hepatitis B surface antigen. These diagnostic kits determine previous infection or response to hepatitis B vaccination. As part of the deal, Biogen will receive royalty payments from Abbott. This agreement marks the third time these comp…	No	Biogen was to receive royalty payments from Abbott.	United States
	Johnson & Johnson Abbott Laboratories	Janssen Pharmaceuticals Inc Abbott Laboratories			NJ IL	United States United States	Licensing Services Research & Development Services	2834	Janssen Pharmaceuticals Inc, located in Titusville, New Jersey, manufactures allergical, anesthesiological, dermatological, virological gastroenterological, neurological, oncological, psychiatrical, parasitological and cardiovascular disease pharmaceuticals Abbott Laboratories, headquartered in Abbott Park, Illinois, manufactures and wholesales general pharmaceuticals and medical equipment. The c…		Abbott Laboratories Inc. signed a joint development and licensing agreement with Janssen Pharmaceutica Inc. which calls for the two companies to co-fund the development of Abbott's new automated drug infusion system. The system will be used to administer Janssen's proprietary analgesic drugs, Alfenta, Sufenta, and Sublimaze, during surgery.	No		United States
	Abbott Laboratories Toyama Chemical Co Ltd	Abbott Laboratories Toyama Chemical Co Ltd			IL FF	United States Japan	Licensing Services Marketing Services	5122	Abbott Laboratories, headquartered in Abbott Park, Illinois, manufactures and wholesales general pharmaceuticals and medical equipment. The company operates through its four divisions namely, Pharmaceutical Products, which offers adult and pediatric pharmaceuticals; Diagnostic Products, responsible for providing diagnostic systems and tests for blood banks, hospitals, commercial laboratories, phy…		Abbott Laboratories and Toyama Chemical Co cross-licensed tosufloxacin, a potent oral antimicrobial. The product was to to be marketed as tablets under the trade name "Tosuxacin" in Japan by Abbott's subsidiary, Dainabot Company.	No		Japan
	Genelabs Technologies Inc Abbott Laboratories	Genelabs Technologies Inc Abbott Laboratories			CA IL	United States United States	Research & Development Services Manufacturing Services Marketing Services Funding Services	8731	Manufacture pharmaceutical products; provide biological research services Abbott Laboratories, headquartered in Abbott Park, Illinois, manufactures and wholesales general pharmaceuticals and medical equipment. The company operates through its four divisions namely, Pharmaceutical Products, which offers adult and pediatric pharmaceuticals; Diagnostic Products, responsible for providing diagnostic …		Abbott Laboratories Inc. has rights to produce and market Hepatitis E Virus (HEV) immunodiagnostics based on Genelabs Inc.'s recent cloning of HEV. The firms will develop the products jointly. The agreement gives Abbott exclusive worldwide rights to the products, except in certain Asian countries where Genelabs retains co-marketing rights. In return, Abbott will provide Genelabs with development …	No	Abbott was to provide Genelabs with development funding and sales royalties.	United States
	Novo Nordisk Fonden International Murex Tech Corp	Novo Nordisk Diagnostics Ltd International Murex Tech Corp			FF FF	United Kingdom Canada	Licensing Services	6794	Manufacture diagnostic substances Manufacture in-vitro test systems to detect, monitor and screen for infectious diseases and other medical conditions		International Murex Tech Corp. signed a cross-licensing pact with a subsidiary of Novo Nordisk A/S covering technology for diagnostic kits. The agreement gives Novo Nordisk Diagnostics Ltd. a non-exclusive license to use Murex's patented single-use diagnostic system (SUDS), a disposable cartridge test. In exchange, Murex receives the right to co-market Novo's SUDS-based tests and gains limited us…	No		Supranational
	Montedison SpA Abbott Laboratories	Erbamont Inc Abbott Laboratories			OH IL	United States United States	Retail & Wholesale Services Marketing Services Research & Development Services	5122	Manufacture pharmaceuticals Abbott Laboratories, headquartered in Abbott Park, Illinois, manufactures and wholesales general pharmaceuticals and medical equipment. The company operates through its four divisions namely, Pharmaceutical Products, which offers adult and pediatric pharmaceuticals; Diagnostic Products, responsible for providing diagnostic systems and tests for blood banks, hospitals, …		Abbott Laboratories Inc. and a subsidiary of Erbamont N.V., Adria Laboratories, have signed an agreement to market and distribute Adria's line of oncology products. The joint marketing effort will target hospitals, wholesalers and home health-care agencies, while Adria will continue to sell its oncology products to clinics, doctors' offices and oncology wholesalers. As part of the agreement, the …	No		United States
Merck	Merck & Co Inc Applied Microbiology Inc	Calgon Vestal Laboratories Applied Microbiology Inc			MO NY	United States United States	Licensing Services	2834	Manufacture pharmaceuticals and chemicals Research and develop biotechnology products		Calgon Vestal Laboratories, a subsidiary of Merck & Co, and Applied Microbiology have entered into a licensing agreement in which Calgon Vestal received rights to Applied Microbiology's Ambicin technology. Calgon Vestal Labs acquired the option to use this technology in April, 1989. Calgon Vestal was expected to use the Ambicin technology for dermatological applications in the hospital and physic…	No		United States
	Degussa AG Merck KGaA	Asta Pharma(Degussa AG) Merck KGaA		50.00 50.00	FF FF	Germany Germany	Research & Development Services Marketing Services Manufacturing Services	2834	Manufacture pharmaceuticals Merck KGaA, located in Darmstadt, Germany, manufactures and wholesales pharmaceuticals, specialty chemicals, and cosmetic pigments. The company operates under four divisions: Merck Serono (biopharmaceuticals), Consumer Health (over-the-counter pharmaceuticals), Performance Materials (high-tech chemicals) and Merck Millipore (products for pharmaceutical research and bio…	Terminated	Asta Pharma and E Merck terminated negotiations to form a joint venture by merging their respective pharmaceutical operations. The two parties set up a commission to explore a possible joint venture in order to offset high R&D costs with economies of scale. Talks later collapsed due to a lack of synergy between the two partners.	Yes		Germany
	Glaxo Holdings PLC Merck & Co Inc	SmithKline Beecham PLC Merck & Co Inc			FF NJ	United Kingdom United States	Licensing Services	6794	Manufacture, research and develop medicinal chemicals and botanical products, human and veterinary ethical pharmaceuticals and over the counter medicines; consumer and health products, including toiletries, cosmetics and food and drink products, specialty cleaning and sanitation preparations; own and operate medical laboratories; produce animal feeds; manufacture laboratory analytical instruments…		SmithKline Beecham PLC has licensed the rights of Biogen Inc.'s hepatitis B vaccine technology to Merck & Co., Inc. SmithKline had acquired rights to manufacture and sell hepatitis B vaccine products from Biogen in 1988 when Merck developed similar technology. This new agreement between Merck and SmithKline Beecham should prevent litigation between the companies. Merck will be able to produce the…	No		Supranational
	Glaxo Holdings PLC Merck & Co Inc	SmithKline Beecham Biologicals Merck & Co Inc			FF NJ	Belgium United States	Licensing Services Marketing Services Manufacturing Services	2836	Manufacture vaccines Merck & Co Inc, located in Whitehouse Station, New Jersey, manufactures and wholesales pharmaceutical products. It offers vaccines and medicines for the treatment of high blood pressure, elevated cholesterol levels, osteoporosis, asthma, benign prostatic hyperplasia, arthritis, migraine, glaucoma, emesis, infectious diseases (antibacterial, antifungal, and antiviral agents), …		SmithKline Beecham Biologicals granted a worldwide sublicense to Merck & Company which covered the manufacture and sale of recombinant hepatitis B vaccines. The technology for hepatitis B surface antigens had been licensed to SmithKline by Biogen NV. Biogen was to receive royalties on the sales of the product.	No		United States
	Clinical Data Inc Merck KGaA	Vital Scientific NV Merck KGaA			FF FF	Netherlands Germany	Research & Development Services Manufacturing Services	3841	Vital Scientific BV based in the Netherlands is a manufacturer of in vitro diagnostic instruments and chemical reagents for utilization in medical laboratory analysis. Merck KGaA, located in Darmstadt, Germany, manufactures and wholesales pharmaceuticals, specialty chemicals, and cosmetic pigments. The company operates under four divisions: Merck Serono (biopharmaceuticals), Consumer Health (over…		E. Merck and Vital Scientific N.V., the Dutch subsidiary of Clinical Data, Inc., agreed to jointly develop blood analyzers for clinical laboratories. The deal enabled E. Merck, a producer of laboratory reagents, to offer combined reagent and instrumentation systems. Under the agreement, Vital will manufacture the analyzers, and E. Merck will distribute them worldwide. The products will be dual-la…	No		Supranational
	Sigma-Tau SpA Merck & Co Inc	Sigma-Tau SpA Merck Sharp & Dohme Italia SpA		50.00 50.00	FF FF	Italy Italy		3711	Sigma-Tau SpA, located in Rome, Italy, manufactures prescription pharmaceuticals intended for final consumption, including biotech products and antibiotics focusing in cardiovascular disease, metabolism, oncology, immunology, and central and nervous system disorders. The company was founded in 1957. Manufacture pharmaceutical products, specialty chemicals and biological health products, and packa…		Merck Sharp & Dohme Italia SpA, a subsidiary of Merck & Co, and Sigma Tau Industrie Farmaceutiche Riunite SpA have agreed to form a 50/50 Italian joint venture to research and develop new therapeutics for diseases such as cancer and viral infections. The new company, called the Instituti di Ricerche di Biologia Molecolare (IRBM), was valued at approximately $50 mil US.	Yes	The new company was valued at $50 mil US.	Italy
	Genset SA	Sofinnova			FF FF	France France		2835	Venture capital firm Provide biological research services		Sofinnova (Financement De L'Innovation SA) invested an undisclosed amount in Genset, a manufacturer and researcher of DNA and RNA diagnostics.	No	Sofinnova (Financement De L'Innovation SA) invested an undisclosed amount in Genset	France
	Merck KGaA Scios Inc	Merck KGaA Scios Inc			FF CA	Germany United States	Licensing Services Research & Development Services Marketing Services Exclusive Licensing Services	6794	Merck KGaA, located in Darmstadt, Germany, manufactures and wholesales pharmaceuticals, specialty chemicals, and cosmetic pigments. The company operates under four divisions: Merck Serono (biopharmaceuticals), Consumer Health (over-the-counter pharmaceuticals), Performance Materials (high-tech chemicals) and Merck Millipore (products for pharmaceutical research and biotechnology). It also serves …		Scios Inc licensed E. Merck to develop and market Scios' fibroblast growth factor (FGF), a wound healing compound. FGF has potential for treating a variety of tissue damage, including skin ulcers, skin grafts, burns and bone injuries. E. Merck will receive exclusive marketing rights for all applications of FGF in Europe and other territories outside North America, except in the Far East. This is …	No		Supranational
	Merck & Co Inc DuPont	Merck & Co Inc DuPont		50.00 50.00	NJ DE	United States United States	Research & Development Services	2834	Merck & Co Inc, located in Whitehouse Station, New Jersey, manufactures and wholesales pharmaceutical products. It offers vaccines and medicines for the treatment of high blood pressure, elevated cholesterol levels, osteoporosis, asthma, benign prostatic hyperplasia, arthritis, migraine, glaucoma, emesis, infectious diseases (antibacterial, antifungal, and antiviral agents), and vaccines to preve…	Terminated	EI DuPont de Nemours & Co (EI) and Merck & Co Inc (MC) terminated their DuPont Merck Pharmaceuticals Co (DMP) joint venture by EI acquiring the remaining 50% interest from MC. Previously in July 1990, EI and MC formed DMP to research and develop pharmaceuticals on a worldwide basis. DMP was to have consisted of a 1500 people research staff, a 600 person sales force, and a $230 million research an…	Yes	The joint venture was to have had a $230 million research and development budget for the first year.	United States
	Yoshitomi Pharmaceutical Inds Intergen Co	International Reagents Corp Intergen Co			FF NY	Japan United States	Marketing Services	8742	Manufacture pharmaceuticals and blood derivative diagnostic reagents Manufacture reagents including biotechnology media, sera, enzymes, protein systems and catalysts used in biopharmceuticals, diagnostics, vaccines and cosmetics		Intergen Co. and International Reagents Corp. (IRC) have signed an agreement which grants exclusive Japanese marketing rights to IRC for Intergen's cell culture and diagnostic reagents. IRC has created a new subsidiary, IRC BioDivision, which as a result of the agreement will market Rehatuin, a fetal bovine serum, and Bovuminar, which consists of bovine albumins, as well as growth factors and cyt…	No		Japan
	Glycomed Inc Millipore Corp Astro-Med Inc	Glycomed Inc Millipore Corp Astro-Med Inc		0.40 0.40 0.20	CA MA RI	United States United States United States		2836	Provide biological research services Millipore Corp, based in Billerica, Massachusetts, manufactures and wholesales medical and analytical laboratory equipment used in the analysis, identification and purification of liquids. The company's specializations include pharmaceuticals, biotechnology medicines and other therapeutic products. The company's services are available to clients in 47 nations.…		Glycomed Incorporated, Millipore and Astro-Med formed a Joint Venture called Glyko. Glyko will develop instruments and reagents for structural analysis of carbohydrates.	Yes		United States United Kingdom
	Genset SA French National Institute of	Genset SA French National Institute of			FF FF	France France	Research & Development Services	3841	Provide biological research services National agency		Genset and the French National Institute of Health have agreed to jointly develop liposomal delivery systems for Genset's antisense oligonucleotides and ribozymes. The resulting technology was to be used in antiviral applications. Financial terms were not disclosed.	No		France
	Mediolanum Farmaceutici SpA Merck & Co Inc	Mediolanum Farmaceutici SpA Merck & Co Inc			FF NJ	Italy United States	Licensing Services Research & Development Services Marketing Services Funding Services	5122	Mediolanum Farmaceutici SpA, located in Milan, Italy, manufactures pharmaceuticals. Merck & Co Inc, located in Whitehouse Station, New Jersey, manufactures and wholesales pharmaceutical products. It offers vaccines and medicines for the treatment of high blood pressure, elevated cholesterol levels, osteoporosis, asthma, benign prostatic hyperplasia, arthritis, migraine, glaucoma, emesis, infectio…		Merck & Co obtained a license from Mediolanum for heptyl-physostigmine, which was originally synthesized by the Italian equivalent of the National Institutes of Health and licensed to Mediolanum. Under the agreement, Merck was to provide development funding as well as development work in the United States and at its Clinical Neuroscience Group in the United Kingdom in consultation with Mediolanum…	No	Merck was to provide funding for projects related to the research and development of heptyl-physostigmine.
Bayer	Bayer AG Calgene Inc	Mobay Corp Calgene Inc			PA CA	United States United States	Research & Development Services	8731	Manufacture plastics material, rubber elastomers, polyurethanes, dyes, pigments, pesticides and agricultural chemicals Own and operate greenhouse; produce and develop agricultural seeds, edible plant oils, and horticultural crops; provide plant DNA research and development services		Mobay Corp and Calgene Inc formed a strategic alliance to provide research and development services in the United States. The alluance usedrecombinant DNA to develop metribuzin tolerant field crops.	No		United States
	Biosym Technologies Inc Bayer AG Ciba-Geigy AG DuPont Hoechst AG Smith & Nephew PLC	Biosym Technologies Inc Bayer AG Ciba-Geigy AG DuPont Hoechst AG Smith & Nephew PLC			CA FF FF DE FF FF	United States Germany Switzerland United States Germany United Kingdom	Research & Development Services	7372	Develop computer aided design software Bayer AG, located in Leverkusen, Germany, manufactures and wholesales chemicals and pharmaceuticals with operations in four divisions namely Healthcare, which comprises the pharmaceuticals, biological products, consumer care, animal health and diagnostics divisions; Crop Science, which develops and sells fungicides, herbicides, insecticides and seed treatmen…		Biosym Technologies Inc, a unit of Corning Inc, and 27 other international industrial and chemical companies have formed a consortium to develop software to be used in the manufacture of polymer-based products. Among the companies involved were: Bayer AG, Ciba-Geigy AG, EI du Pont de Nemours & Co (Du Pont), Hoechst AG, a subsidiary of Friedrich Krupp GmbH, and Smith & Nephew. Financial terms were…	No		Supranational
	Juste SA Quimica Farmaceutica Schering AG	Juste SA Quimica Farmaceutica Schering AG		50.00 50.00	FF FF	Spain Germany		8731	Juste SA Quimica Farmaceutica, based in Madrid, Spain, manufactures pharmaceuticals such as antihistamines and anti-bacterial products. The company was founded in 1922. Manufacture and wholesale hormonal contraceptives and preparations, oral formulation, human monoclonal antibodies, immune and therapeutic drugs for hematological malignancies, X-ray contrast media and magnetic resonance imaging fo…		Juste SA Quimica Farmaceutica and Schering's Spanish branch formed an equally-owned joint venture with an initial capital of $10.9 million. The new company, Justesa Imagen, was established to research and develop contrast media.	Yes	The equally-owned joint venture was capitalized at $10.9 million.	Spain
	Schering AG Sandoz AG	Schering AG Sandoz AG		50.00 50.00	FF FF	Germany Switzerland	Manufacturing Services	2873	Manufacture and wholesale hormonal contraceptives and preparations, oral formulation, human monoclonal antibodies, immune and therapeutic drugs for hematological malignancies, X-ray contrast media and magnetic resonance imaging for visual diagnostics, and special therapeutic products related to peripheral arterial occlusive diseases, pulmonary hypertension, and multiple sclerosis; provide pharmac…	Terminated	Schering AG terminated its joint venture agreement with Sandoz AG to produce agrochemicals. The joint venture was terminated in May, 1990.	Yes		Switzerland
	Bayer AG Kyowa Hakko Kogyo Co Ltd	Miles Inc Kyowa Hakko Kogyo Co Ltd			IN FF	United States Japan	Marketing Services	2833	Manufacture pharmaceutical preparations products, vitamins, organic and inorganic industrial and medicinal chemicals, in vitro and in vivo diagnostic substances, dental equipment and supplies, pigments and enamels, equipment for photography and photoprocessing Kyowa Hakko Kogyo Co Ltd, headquartered in Japan and founded in 1949, manufactures and wholesales pharmaceutical products such as drugs fo…	Terminated	Strategic alliance plans have been terminated to market enzymes and related products in Japan. In June 1990, Miles-Kyowa was aborted when Miles sold its interest to Kyowa. The abortion agreement also stipulated that Kyowa would have the opportunity to form a new joint venture with Solvay to continue the enzyme business in Japan.	No		Japan
	Bayer AG Teijin Ltd	Bayer AG Teijin Ltd			FF FF	Germany Japan	Licensing Services Research & Development Services Marketing Services Manufacturing Services Exclusive Licensing Services	2836	Bayer AG, located in Leverkusen, Germany, manufactures and wholesales chemicals and pharmaceuticals with operations in four divisions namely Healthcare, which comprises the pharmaceuticals, biological products, consumer care, animal health and diagnostics divisions; Crop Science, which develops and sells fungicides, herbicides, insecticides and seed treatment products; and Material Science which …		Bayer AG and Teijin Ltd have entered into an agreement in which Bayer received an exclusive license to Teijin's human monoclonal antibody, TI-23, in Europe, Latin America, and the US. TI-23 was an antibody against cytomegalovirus. Bayer also received exclusive development, manufacturing, and marketing rights to the drug in the US. Financial terms were not disclosed.	No		Germany
	Hafslund Nycomed AS Schering AG	Nycomed Pharma AS Schering AG			FF FF	Norway Germany	Licensing Services Manufacturing Services	6794	Manufacture prescription pharmaceuticals intended for final consumption, including biotech products and antibiotics Manufacture and wholesale hormonal contraceptives and preparations, oral formulation, human monoclonal antibodies, immune and therapeutic drugs for hematological malignancies, X-ray contrast media and magnetic resonance imaging for visual diagnostics, and special therapeutic product…		Nycomed AS and Schering AG have renegotiated their agreement on Nycomed's x-ray contrast medium, Omnipaque, whereby Schering no longer had the right to produce the basic substance for Omnipaque. The agreement was revised to adapt to changing market conditions in Europe. Schering had licensing rights to Omnipaque in Europe since the product was first approved in the early 1980s. Both companies bel…	No		Supranational
	Bayer AG Ashland Oil Inc	Mobay Chemical Corp(Bayer AG) Ashland Chemical(Ashland Oil)			PA OH	United States United States	Retail & Wholesale Services	5162	Manufacture plastic, synthetic rubber, elastomers, polyurethanes and agricultural chemicals Manufacture and wholesale chemicals and foundry products		Mobay Chemical Co. and Ashland Chemical, Inc. have entered a an agreement concerning certain Mobay products. Under the terms of the agreement, Ashland's IC&S Division will serve as the exclusive national distributor of Mobay's line of aqueous raw materials for the manufacture of waterborne adhesive systems.	No		United States
	Schering AG Chemische und Pharmazeutische	Schering AG Chemische und Pharmazeutische		50.00 50.00	FF FF	Germany East Germany		2819	Manufacture and wholesale hormonal contraceptives and preparations, oral formulation, human monoclonal antibodies, immune and therapeutic drugs for hematological malignancies, X-ray contrast media and magnetic resonance imaging for visual diagnostics, and special therapeutic products related to peripheral arterial occlusive diseases, pulmonary hypertension, and multiple sclerosis; provide pharmac…		To produce chemical and pharmaceutical products in Germany. The new company was initially expected to have 20 employees.	Yes		East Germany
	Paravax Inc Bayer AG	Paravax Inc Mobay Corp			CA PA	United States United States	Research & Development Services	8731	Manufacture and develop animal vaccines Manufacture plastics material, rubber elastomers, polyurethanes, dyes, pigments, pesticides and agricultural chemicals		Paravax Inc and Mobay Corp, a unit of Bayer AG's Bayer USA Inc subsiaidry, formed a strategic alliance to provide vaccine development services in the United States. The alliance collaborated on the development of a cat vaccine against Toxoplasma gondii. Mobay Corp.'s Animal Health Division worked with Paravax, a company that specialized in the development of animal vaccines for parasite control. …	No		United States
	SciMed Life Systems Inc Possis Corp	SciMed Life Systems Inc Possis Corp			MN MN	United States United States	Licensing Services Research & Development Services Marketing Services Manufacturing Services Funding Services		Manufacture and wholesale cardiovascular medical products Provide engineering services; provide research and development services for medical products; manufacture waterjet cutting equipment	Terminated	SciMed Life Systems, Inc. and Possis Medical terminated an agreement to license, develop, manufacture and market Possis Medical's AngioJet and related products. In exchange for technical and financial resources to speed up development, SciMed will receive exclusive worldwide marketing rights to AngioJet and other angioplasty products resulting from the agreement. The AngioJet thrombectomy system …	No
	Bayer AG British Petroleum Co PLC	Bayer AG British Petroleum Co PLC		50.00 50.00	FF FF	Germany United Kingdom	Manufacturing Services	2911	Bayer AG, located in Leverkusen, Germany, manufactures and wholesales chemicals and pharmaceuticals with operations in four divisions namely Healthcare, which comprises the pharmaceuticals, biological products, consumer care, animal health and diagnostics divisions; Crop Science, which develops and sells fungicides, herbicides, insecticides and seed treatment products; and Material Science which …	Terminated	Bayer AG (BA) and BP Amoco PLC (BPA) terminated their joint venture agreement. BPA acquired BA's 50% interest in Erdoelchemie GmbH (EE) . Previously in May 1990, BA and BPA formed a joint venture named EE to manufacture ethylene oxide chemicals that are used in detergents cleansers and cosmetics in Germany. BA and BPA each held a 50% interest in EE.	Yes		Germany
	Schering AG Liposome Co Inc	Schering AG Liposome Co Inc			FF NJ	Germany United States	Licensing Services Research & Development Services Marketing Services	6794	Manufacture and wholesale hormonal contraceptives and preparations, oral formulation, human monoclonal antibodies, immune and therapeutic drugs for hematological malignancies, X-ray contrast media and magnetic resonance imaging for visual diagnostics, and special therapeutic products related to peripheral arterial occlusive diseases, pulmonary hypertension, and multiple sclerosis; provide pharmac…		Schering AG and The Liposome Company signed a joint development and licensing agreement for the development of a liposomal non-ionic contrast agent for use in CT liver scans. Schering received manufacturing and marketing rights to the product, which was an in vivo imaging agent encapsulated in Liposome's proprietary TLC I-16 liposomes. In return, Schering will reimburse Liposome for development c…	No	Schering agreed to reimburse The Liposome Company for all development costs. Schering also was to pay a licensing fee, several milestone payments, and royalties on worldwide sales. The total value of the agreement was estimated at $15 million plus royalties, if the product reached commercialization.	Supranational
Eli Lilly	Eli Lilly & Co Baxter International Inc	Hybritech Inc(Eli Lilly & Co) Baxter Healthcare Corp			CA IL	United States United States	Research & Development Services Marketing Services	8731	Manufacture immunodiagnostic devices and test kits Baxter Healthcare Corp, located in Deerfield, Illinois, manufactures pharmaceutical and medicinal products, surgical instruments and laboratory equipment.		Baxter Healthcare and Hybritech formed a strategic alliance to provide monoclonal antibody tests for cancer development and marketing services in the United States. The companies agreed to codevelop the tests, which Baxter will manufacture and Hybritech will market under the Hybritech label. The products are for use with Baxter's Dade Stratus Immunoassay System, an automated analyzer that quickly…	No		United States
	Glycomed Inc Eli Lilly & Co	Glycomed Inc Eli Lilly & Co			CA IN	United States United States	Research & Development Services Licensing Services Marketing Services Exclusive Licensing Services	8731	Provide biological research services Eli Lilly & Co, located in Indianapolis, Indiana, manufactures and wholesales pharmaceuticals and diagnostic and animal health products. The company specializes in research and development, production and marketing of products for the treatment of diabetes worldwide. It has research and development facilities in nine countries and conducts clinical trials. The…		Glycomed Inc and Eli Lilly & Co (EL) formed a strategic to provide research and development services of restenosis medical product for the treatment of vascular diseases in the United States. Under the terms of the agreement, EL funded the research with $8.1 mil US over three years and paid an additional $3 mil in milestone payments. EL also received an option to acquire an exclusive worldwide li…	No	Eli Lilly funded the research project with $8.1 mil US over three years and paid an additional $3 mil in milestone payments.	United States
	Eli Lilly & Co Mochida Pharmaceuticals Co Ltd	Pacific Biotech Inc(Eli Lilly) Mochida Pharmaceuticals Co Ltd			CA FF	United States Japan	Marketing Services	2835	Manufacture and develop systems for infectious diseases and fertility products for chlamydia and lyme disease Mochida Pharmaceutical Co Ltd, based in Tokyo, Japan, is engaged in the manufacture and wholesale of drugs. The Company operates in two business segments. The Pharmaceutical-related segment is engaged in the manufacture, purchase and sale of pharmaceutical products, the purchase and sale …		Mochida Pharmaceutical Co Inc signed an agreement to distribute Pacific Biotech's reagents in the Japanese market.	No		United States Japan
	Maxwell Communication Corp PLC Eli Lilly & Co	Molecular Design Ltd Eli Lilly & Co			CA IN	United States United States	Software Development Services	7372	Develop chemical research computer software Eli Lilly & Co, located in Indianapolis, Indiana, manufactures and wholesales pharmaceuticals and diagnostic and animal health products. The company specializes in research and development, production and marketing of products for the treatment of diabetes worldwide. It has research and development facilities in nine countries and conducts clinical tria…		Molecular Design Ltd and Eli Lilly formed a strategic alliance to develop scientific workstation software in the United States.	No		United States
	Eli Lilly & Co Allelix Biopharmaceuticals Inc	Eli Lilly Canada Inc Allelix Biopharmaceuticals Inc			FF FF	Canada Canada	Research & Development Services	2836	Eli Lilly Canada Inc, located in Toronto, Ontario, manufactures prescription, over the counter and biological products for human and animal use, home health care products, medical supplies, monitoring and other equipment. Manufacture pharmaceuticals and biopharmaceuticals		Eli Lilly and Co. and Allelix Biopharmaceuticals have agreed to conduct research together. The two companies will identify and clone genes for central nervous system molecules known as Excitatory Amino Acid (EAA).	No		United States
	Soc Nationale Elf Aquitaine Sphinx Pharmaceuticals Corp	Elf Technologies Inc Sphinx Pharmaceuticals Corp			CT NC	United States United States		2834	Provide corporate equity investment services in defined areas of interest for the parent company(SNEA) Manufacture pharmaceutical products, including synthetic organic molecules		Elf Technologies, Inc., the venture capital investment subsidiary of Societe Nationale Elf Aquitaine, invested $750,000 in Sphinx Pharmaceuticals Corp. Sphinx develops pharmaceuticals based on the role of cell membrane lipids in regulating cellular processes.	No		United States
BMS	Sumitomo Metal Industries Ltd Bristol-Myers Squibb Co	Sumitomo Metal Industries Ltd Bristol-Myers Squibb Co			FF NY	Japan United States	Research & Development Services	8731	Sumitomo Metal Industries Ltd, headquartered in Osaka, Japan, is engaged in the manufacture and wholesale of steel products including steel sheets, plates, tubes, pipes, bars, wire and rods, machinery parts and construction materials. The operations are carried out through the following divisions: Steel; Engineering; Electronics & Information Service; and others. The steel division is engaged in …		Sumitomo and Bristol-Meyers established a joint biomedical research and development team at their already existing joint venture, SMI-Bristol Ltd. The R&D is aimed at developing medicines for human hormones and genes. Medicines will be produced at Sanko Junyaku Co., a trading company in which Sumitomo has a minority share. Bristol-Meyers will use some of the medicines, but a specific marketing ag…	No		Jamaica
	Centre National de Transfusion Medarex Inc	Centre National de Transfusion Medarex Inc			FF NJ	France United States	Licensing Services Research & Development Services	2836	Own and operate blood transfusion centers and organ banks Medarex Inc, located in Princeton, New Jersey, is a biopharmaceutical company focused on the discovery, development, and potential commercialization of fully human antibody-based therapeutics to treat life- threatening and debilitating diseases, including cancer, inflammation, autoimmune and infectious diseases. It was founded in 1987.		Centre National de Transfusion Sanguine and Medarex Inc have entered into an agreement to develop Medarex's monoclonal antibody-based treatments for AIDS, cancer and infectious diseases. Centre National received a license to Medarex's treatments. Financial terms were not disclosed.	No		United States France
	Procept Inc Bristol-Myers Squibb Co	Procept Inc Bristol-Myers Squibb Co			MA NY	United States United States	Research & Development Services	2836	Manufacture diagnostic and therapeutic pharmaceutical products Bristol-Myers Squibb Co, located in New York, New York, manufactures pharmaceuticals and medical products. It also offers health products, surgical supplies and equipment in vitro and in vitro diagnostic substances, toiletries, beauty aids, household products, and dry, condensed and evaporated dairy products. The company's blockbuster…		Bristol-Meyers Co. signed a five-year collaborative R&D agreement with Procept, a Cambridge-based immunologic drug firm. Under the new agreement, Bristol-Meyers will obtain exclusive worldwide rights to therapeutic applications of proprietary receptor technology used to fight autoimmune disease and organ transplant rejection. Manufacturing and marketing rights will remain solely with Procept. Sep…	No		United States
	Massachusetts General Hospital Bristol-Myers Squibb Co	Massachusetts General Hospital Bristol-Myers Squibb Co			MA NY	United States United States	Licensing Services Research & Development Services Funding Services	8731	Massachusetts General Hospital, headquartered in the United States, owns and operates a hospital. It also provides research and clinical trials. It is a teaching hospital of Harvard Medical School. The company was found in 1811. Bristol-Myers Squibb Co, located in New York, New York, manufactures pharmaceuticals and medical products. It also offers health products, surgical supplies and equipment…		Bristol-Meyers Squibb Company and Massachusetts General Hospital have agreed to conduct research at Massachusetts General on the gene and molecule level concerning cardiovascular disease and treatment. Under the terms of the agreement, Bristol-Meyers will provide $36.8 million for research over a five-year period and have the option to license any patents resulting from the research. Additionally…	No	Bristol-Myers was to provide approximately $36.8 million in research funding over a five-year period and pay royalties to the hospital upon the sale of products using its technology.
	Bristol-Myers Squibb Co Chesapeake Biological Labs Inc	Edward Weck Inc Chesapeake Biological Labs Inc			NJ MD	United States United States	Marketing Services	2836	Manufacture surgical equipment and supplies Manufacture pharmaceuticals and biopharmaceutical products; manufacture medical devices	Terminated	Chesapeake Biological Laboratories (CBL) and Edward Weck Inc. terminated their 20-year marketing agreement signed in October, 1986 regarding CBL's hyaluronic acid-based Vitrax ophthalmic product and other viscoelastic products. Additionally, CBL and Weck terminated R&D agreements concerning orthopedic uses for Vitrax and other viscoelastic products. As part of the termination agreement, CBL will …	No		United States
	Medco Research Inc Bristol-Myers Squibb Co	Medco Research Inc Bristol-Myers Squibb Co			NC NY	United States United States	Manufacturing Services	2835	Manufacture pharmaceuticals focusing on cardiovascular medicines and adenosine-receptor technologies Bristol-Myers Squibb Co, located in New York, New York, manufactures pharmaceuticals and medical products. It also offers health products, surgical supplies and equipment in vitro and in vitro diagnostic substances, toiletries, beauty aids, household products, and dry, condensed and evaporated dai…		Medco Research Inc. has collaborated with Squibb Diagnostics, a division of Bristol-Meyers Squibb Company, to study a new method for diagnosing coronary artery disease. The new approach combines Medco's Adenoscan, a drug used in conjunction with cardiac imaging, and Squibb's CardioTec, a radiopharmaceutical product also used for cardiac imaging. The study is investigating if using Adenoscan, in c…	No		United States
	Stanford University GenPharm International Inc	Stanford University GenPharm International Inc			CA CA	United States United States	Licensing Services	6794	Stanford University, located in Stanford, California, is an owner and operator of a university, founded in 1891. Biological research; Manufacture pharmaceuticals		GenPharm International Inc. has received a worldwide license from Stanford University concerning hematopoietic stem technology. The license includes using technologies related to stem cells, growth factors and gene therapy. With these technologies, GenPharm can apply its homologous (gene targeting) recombination technology to the development of treatments for hematopoietic diseases.	No		United States
	University of Utah Research GenPharm International Inc	University of Utah Research GenPharm International Inc			UT CA	United States United States	Licensing Services	6794	Provide research services Biological research; Manufacture pharmaceuticals		GenPharm International Inc. has received licenses from the University of Utah Research Foundation concerning its homologous recombination technologies. One license covers Utah's "positive/negative" selection technique used to precisely add, modify, or delete genes in an animal or cell genome. GenPharm received a second license concerning developments in monoclonal antibody research. Both are excl…	No		United States
	Syncor International Corp Bristol-Myers Squibb Co	Syncor International Corp Bristol-Myers Squibb Co			CA NY	United States United States	Marketing Services	8742	Wholesale diagnostic imaging and therapy agents including Oncology, Cardiology, PET imaging and CMI Centers; provide information management systems Bristol-Myers Squibb Co, located in New York, New York, manufactures pharmaceuticals and medical products. It also offers health products, surgical supplies and equipment in vitro and in vitro diagnostic substances, toiletries, beauty aids, household …		Squibb Diagnostics and Syncor International Corporation have signed a marketing and distribution agreement concerning Squibb's CardioTec, a new myocardial perfusion agent. CardioTec is the first of a new class of radiopharmaceuticals called BATOs, boronic acid adducts of technetium oxims, which wash out from the myocardium more rapidly and result in faster completion of diagnostic procedures. Squ…	No		United States
	Johnson & Johnson Bristol-Myers Squibb Co	McNeil Pharmaceutical Bristol-Myers Squibb Co			PA NY	United States United States	Marketing Services	2836	Manufacture prescription pharmaceuticals intended for final consumption, including biotech products and antibiotics Bristol-Myers Squibb Co, located in New York, New York, manufactures pharmaceuticals and medical products. It also offers health products, surgical supplies and equipment in vitro and in vitro diagnostic substances, toiletries, beauty aids, household products, and dry, condensed and…	Terminated	Bristol-Myers Squibb Company and McNeil Pharmaceutical have terminated a January 1988 agreement under which the two companies had agreed to co-promote Capoten, Squibb's ACE inhibitor, for treating hypertension and heart failure. In October 1989, Bristol-Myers merged with Squibb and formed a combined sales force to market Capoten alone. Bristol-Myers Squibb and McNeil Pharmaceutical mutually agree…	No		United States
	Collagen Corp Bristol-Myers Squibb Co	Collagen Corp Bristol-Myers Squibb Co			CA NY	United States United States	Research & Development Services	2836	Manufacture biomedical implants and devices for the treatments of defective, diseased, traumatized or aging human tissues Bristol-Myers Squibb Co, located in New York, New York, manufactures pharmaceuticals and medical products. It also offers health products, surgical supplies and equipment in vitro and in vitro diagnostic substances, toiletries, beauty aids, household products, and dry, condens…	Terminated	Collagen Corp. terminated an agreement with Bristol-Meyers Squibb Company to jointly explore applications for Collagen's proprietary Transforming Growth Factor beta, type 2 (TGFb2) for immune-related conditions and cancer.	No		United States
	Bristol-Myers Squibb Co Mitsubishi Kasei Corp	Bristol-Myers Squibb Co Mitsubishi Kasei Corp			NY FF	United States Japan	Research & Development Services	2834	Bristol-Myers Squibb Co, located in New York, New York, manufactures pharmaceuticals and medical products. It also offers health products, surgical supplies and equipment in vitro and in vitro diagnostic substances, toiletries, beauty aids, household products, and dry, condensed and evaporated dairy products. The company's blockbuster cardiovascular line-up includes heart disease drug Plavix, as …		Mitsubishi Kasei Corp, a unit of Mitsubishi Bank, and Bristol-Myers Squibb Co have agreed to jointly research and develop Mitsubishi's MCI-196, a hypolemic anion exchange resin that lowered cholesterol. The drug was in clinical trials in Japan, Europe, and the US. Financial terms were not disclosed.	No		Japan United States

## Sheet: alliances_1991
ALL:1991
company	subsidiary	name alliance partner company	Deal value (mil$)	stake equity	target state	country	industry (high-tech) code	Target SIC code	company description	remarks	deal info
J&J	ALZA Corp.	Osteotech inc.			NJ	US		3841	Osteotech Inc, headquartered in Eatontown, New Jersey, manufactures and wholesales biologic products focused on the processing of human bone and connective tissue for transplantation and in the development, manufacturing and marketing of biologic, biomaterial and device systems for musculoskeletal surgery. The company was founded in 1986.	terminated	terminated in 1992, The systems were targeted for applications in musculoskeletal medicine. Once the termination of the agreement was final, ALZA was granted all rights to the products and the related technical information that were the subject of the agreement, while Osteotech was relieved from making any further payments to ALZA.
	(Karo Bio) Scios	Farmos Group				UK		2836	Manufacture and wholesale animal feed and fertilizer; holding company		Karo Bio and Farmos Group entered into an agreement to develop drugs for breast cancer based on research on receptors, especially thyroid hormones and receptors for vitamin D, progesterone, and other steroids.
	Janssen Pharmaceutica	University of Chicago/ UR labs			IL	US		2836	University		Janssen Pharmaceutica Inc, a subsidiary of Johnson & Johnson's Janssen Pharmaceutica NV, the University of Chicago, and UR Labs have entered into a licensing agreement in which Janssen received development, manufacturing, and marketing rights to the University's and UR Labs' methylnaltrexone compound. The compound, which was in Phase II clinical trials, was expected to be used for the prevention …
	Centocor	Enzytech Inc.	2.5	0.11	MA	US		2834	Manufacture monoclonal antibody pharmaceutical products; provide commercial physical research services		Centocor and Enzytech signed an agreement for the joint development of new drug delivery systems for Centocor's monoclonal antibody-based pharmaceuticals. Centocor hoped to use Enzytech's drug delivery systems, namely its Oralease oral system, to administer its drugs, which currently require frequent injections because of breakdown by the gastrointestinal tract. As part of the agreement, Centocor…
	ALZA Corp.	GD Searle & Co(Monsanto Co)			IL	US		2834, 8731	Manufacture pharmaceuticals, NutraSweet and various consumer products		Searle and ALZA entered into a joint agreement to develop an enhanced version of Searle's hypertension drug Calan using ALZA's OROS drug delivery system. The new drug was to use the OROS technology called GITS, or Gastrointestinal Therapeutic Systems, to time the release for early morning, which was a critical timeframe for hypertension control. Under the agreement, Searle was to have worldwide m…
	Ortho Biotech Products	Cortecs Ltd				UK		2836, 8731	Manufacture prescription pharmaceuticals intended for final consumption, including biotech products and antibiotics Biotechnology company		Cortecs Ltd granted Ortho Biotech, a subsidiary of Johnson & Johnson, a license to its recombinant human erythropoietin. Ortho was to develop an oral formulation of Cortecs' product. Financial terms were not disclosed.
	Centocor	Corvas Inc		0.2	PA	US		8731	Manufacture pharmaceutical products used for thrombolytic vascular diseases		Corvas International Inc. granted Centocor Inc. a worldwide license to develop Corvas International's Corsevin M, which is a monoclonal antithrombotic drug that is designed to block the initiation of a critical blood clot forming process. Corvas also granted Centocar an exclusive option to license future monoclonal antibody products discovered or developed by Corvas. The agreement called for Cent…
	Scios Inc	Children's Medical Center				US		8731	Children's hospital		Scios acquired the exclusive worldwide rights to heparin binding epidermal growth factor (HB-EGF) from the Children's Medical Center in Boston. HB-EGF was first identified at the Medical Center, and was believed to be a potential treatment for gastrointestinal and lung disorders, based on its activity in promoting the growth of epithelial cells. Under the agreement, Scios was to be responsible fo…
Pfizer	Lederle Labs(Amer Cyanamid Co) (wyeth)	Elan Corp PLC				Ireland-Rep		2836	Elan Corp PLC, based in Dublin 2, Ireland, is a neuroscience-based biotechnology company. It focuses on discovering, developing, manufacturing and marketing advanced therapies in neurology, autoimmune diseases, and severe pain. It also manufactures pharmaceuticals. The company was founded in 1969.		Lederle Labs and Elan Corp., Plc. signed an agreement to jointly develop and market the ProStep transdermal nicotine-patch smoking-cessation product. ProStep was designed to help smokers quit the habit by delivering a controlled dose of the addictive drug through the skin.
	Warner-Lambert Co	Dura Pharmaceuticals Inc			CA	US		2834	Develop, market and sell prescription products that treat respiratory conditions and infectious diseases		Warner-Lambert Co (Wl) and Dura Pharmaceuticals (DP), a unit of Immunetech Pharmaceuticals, formed a strategic alliance wherein WI licensed DP to utilize its two anti-allergy compounds in the United States. The two unique compounds have successfully undergone U.S. Phase 1 clinical trials and have been issued patents for the U.S., Europe, and Asia. Dura plans to undertake the development of the co…
	Pfizer Inc	Scios Inc (later van j&j)			CA	US		2834	Manufacture prescription pharmaceuticals intended for final consumption, including biotech products, focusing on cardiovascular and inflammatory diseases, through the integration of expertise in protein biology, computational and medicinal chemistry		Scios Nova Inc and Pfizer Inc signed an agreement to jointly develop insulinotropin for the treatment of Type II Diabetes. As of April 1992, the development program had entered Phase II clinical trials. On April 27, 1994, the partners announced that they had restructured their joint development agreement for insulinotropin. According to the new agreement, Pfizer agreed to provide certain time-bas…
	American Cyanamid Co	Quadra Logic Technologies Inc				Canada		2834	QLT Inc. is a biopharmaceutical company dedicated to the discovery, development and commercialization of therapies in the fields of ophthalmology, dermatology, oncology and urology. The company's primary commercial product, Visudyne, utilizes photodynamic therapy (light activated drugs)		Quadra Logic Technologies, Inc. has announced an amendment to its agreement with American Cyanamid Co. concerning the co-development and distribution of Photofrin, Quadra Logic's pharmaceutical presently under trial for the treatment of lung, esophageal, bladder, and cervical cancers. Previously, Quadra Logic was responsible for all development costs for the drug. The new agreement states that Qu…
	Upjohn Co-Polymer Chemical	Chantal Pharmaceutical Corp	3		CA	US		2834	Manufacture pharmaceutical products		Chantal Pharmaceutical Corp. has granted Upjohn Co. a license to develop and market Chantal's Cyoctol, used in the treatment of acne and male pattern baldness. Under the agreement, Upjohn paid $3 million to Chantal, and also agreed to pay milestone and royalty payments on Cyoctol's sales. In return, Upjohn received warrants to purchase 375,000 shares of Chantal common stock. Upjohn plans to marke…
	Pfizer Inc	Ligand Pharmaceuticals Inc			CA	US		2835	Ligand Pharmaceuticals Inc, located in San Diego, California, manufacture diagnostic tests for cancer. The company was founded in 1987		Pfizer Inc. and Ligand Pharmaceutical signed five-year research and development project involving osteoporosis treatments. Pfizer also receives sales rights to the new osteoporosis drugs, which will incorporate Ligand's process of using intracellular receptors to turn on and off the cell mechanisms associated with disease. The size and value of Pfizer's stake in Ligand was not disclosed.
	Lederle Labs(Amer Cyanamid Co) (wyeth)	Celltech Group PLC				UK		8731	Provide biological research services; manufacture pharmaceuticals, and biological products		Lederle and Celltech agreed to co-develop monoclonal antibody delivery systems for Lederle's oncology drugs, Novantrone and claichemicin, which were used in basic research for the treatment of breast cancer.
	Pfizer International Inc	Biogal Pharmaceuticals Co				Hungary		2834	Manufacture and wholesale pharmaceuticals		Pfizer and Biogal Pharmaceuticals formed a joint venture to wholesale drugs in Hungary. The new company, Pfizer Biogal Kft, was to be based in Budapest and planned to market new products resulting from a research and development program. The two companies were researching a cardiovascular drug called Minipress and an injectible antibiotic called Cefobid.
	Wyeth-Ayerst Laboratories	Athena Neurosciences Inc	2	0.02	CA	US		2834	Manufacture pharmaceuticals		Athena Neuroscience and Wyeth-Ayerst signed an agreement whereby Wyeth-Ayerst was to help fund Athena's cell trafficking research to develop treatments for stroke, head injuries, migraine, and all non-CNS applications. As part of the agreement, Wyeth-Ayerst received exclusive worldwide rights to any products resulting from the program. In return, Athena received rights to Wyeth-Ayerst's Phase II …
	Amer Cyanamid-Agricultural Div (Wyeth)	InnoVet Inc			FL	US		2834	Manufacture pharmaceutical, biological and diagnostic products that address human and animal health needs, with extensive research and development activities		InnoVet and American Cynamid's Agricultural Research division signed an agreement whereby InnoVet was to apply its Microdroplet drug delivery system to develop a novel formulation of an unnamed proprietary Cynamid compound. Under the agreement, Cynamid retained the right to commercialize the compound if successfully developed through a licensing agreement to be negotiated. InnoVet's Microdroplet …
	Pfizer Inc	University of Kent	2.5			UK		8221	University		The University of Kent at Canterbury and Pfizer's Pfizer Central Research signed a three-year research agreement to study the structure and function of hormone receptors and other therapeutically important proteins. The agreement was expected to investigate potential applications of molecular biology technologies through the protein research. The agreement had a projected cost of US$2.5 mil.
Roche	Boehringer Mannheim Corp (Corange Ltd)	Tago Inc			CA	US		2835	Manufacture diagnostic instruments and reagents and orthopedic implants		Boehringer Mannheim Corp's Biochemical products division signed a marketing and business development agreement with the TAGO company for TAGO's products. The products include reagents and research materials for human diagnostics.
	Genentech Inc	Glycomed Inc	22	0.1	CA	US		8731	Provide biological research services	terminated	Glycomed and Genetech agreed to terminate their joint research and development alliance in cell adhesion. Originally, Genentech Inc and Glycomed Inc agreed to jointly develop carbohydrate-based therapeutics for the treatment of cancer and inflammatory diseases. Research efforts will focus on the development of pharmaceuticals which blocked certain cell adhesion molecules. Glycomed provided the kn…	Genetech agreed to provide $15 mil US for research and development, $7 mil US of which will be an equity investment in Glycomed, yielding less than a 10% stake in the company.
	Genentech Inc	Telios Pharmaceuticals Inc	15		CA	US		2834	Manufacture pharmaceutical products; provide laboratory testing services	terminated	Telios Pharmaceuticals terminated its licensing agreement with Genentech. Originally, Telios Pharmaceuticals granted Genentech a license to develop and market Telios' IIb/IIIa inhibitors, which were used for preventing the formation of blood clots. Under the agreement, Genentech was to be responsible for toxicology, clinical development, and 50% of the manufacturing of commercial supplies. In ret…
	Genentech Inc	Xenova Ltd	40			UK		8731	Provide biological research services		Genentech and Xenova have agreed to expand their current joint research and development agreement regarding small molecule therapeutics into the areas of cardiovascular disease and growth control. Genentech will develop and market products covered by the agreement in the United States, Xenova will have rights in Europe, and both companies will have product rights for the rest of the world. Genent…
	Hoffmann-La Roche Inc	Marion Merrell Dow Inc			MO	US		2834	Manufacture pharmaceuticals and surgical appliances and supplies		Marion Merrell Dow, Inc. and Hoffmann-La Roche have signed an agreement for the worldwide development and marketing of Roche's Ro 40-5967, a calcium channel blocker currently in Phase II clinical trials in Europe. Ro 40-5967 is a cardiovascular drug designed to be a once-a-day treatment for hypertension and angina. Marion Merrell Dow will provide the deal with expertise gained in the U.S. from ma…
	Tanox Inc	Ciba-Geigy Ltd(Ciba-Geigy AG)				France		2834	Biotechnology company		Ciba-Geigy Ltd. and Tanox Biosystems Inc formed a strategic alliance to provide research and development services of AIDS therapeutic based on monoclonal antibodies globally.	Tanox was to receive royalties on future product sales.
	Syva Co(Syntex Corp)	DuPont			DE	US		2821	EI du Pont de Nemours & Co {DuPont}, headquartered in Wilmington, Delaware, manufactures and develops fluoropolymers, polymer adhesives, vinyl and laminate flooring, safety glass interlayers, sandblasting materials, lighting lamps, cleaning solvents, disinfectants, lubricants, monomers, inoculants, insecticides, fungicides, optical and thermal color filters, printed circuit boards, semiconductor …		EI DuPont de Nemours & Co and Syva Co formed a strategic alliance to provide research and development services of diagnostic testing for thyroid function, fertility, cancer, anemia and hepatitis in the United States.
	Syntex Corp	Hong Kong Institute of Biotech			Hong Kong	China		8731	Provide plant and organism research services		Syntex Corp. and the Hong Kong Institute of Biotechnology agreed to establish a joint venture to test Chinese plants and microorganisms for possible use as drugs.
	Roche Dermatologics	Fountain Pharmaceuticals Inc			FL	US		2834	Manufacture pharmaceuticals; provide pharmaceutical research services		Fountain Pharmaceuticals Inc. and Roche Dermatologics signed an agreement for the joint research and development of Fountain's "solvent dilution microcarrier technology." Fountain uses soy bean lipid spheres 1/50th the size of a human cell to deliver therapeutic compounds.
	Genentech Inc	NeoRx Corp			WA	US		2834	Manufacture cancer diagnostic and treatment products; provide cancer research services		Genentech Inc. and NeoRx signed a one-year agreement for the joint research and development of cancer therapies using Genentech's monoclonal antibodies against HER-2 oncoprotein and NeoRx's radiotherapy and trichothecene technologies. The collaboration between the two companies will center on integrating their two technologies; each party will be responsible for its own specific research costs.
	Roche Biomedical Laboratories	MediGene Inc			NY	US		8731	Provide in vitro PCR laboratory testing services		Perkin-Elmer and Hoffmann-La Roche entered into an agreement to jointly perform in Vitro PCR laboratory testing services. PCR is the acronym for polymerase chain reaction technology.
	Hoffmann-La Roche Inc	Perkin-Elmer Corp			CT	US		3821	Manufacture analytical instruments and equipment to determine the composition and molecular structure of chemical substance, such as DNA, for the pharmaceutical, biotechnology, environmental testing, food, agriculture, and chemical manufacturing industries		Hoffmann-La Roche and Perkin Elmer formed a strategic alliance for the development of polymerase chain reaction (PCR) technology. Roche acquired the rights to PCR from Cetus for $300 million, plus up to an additional $30 million in royalties dependent upon sales. Roche then took over the role of Cetus in its joint PCR project with Perkin-Elmer. Roche was to hold the worldwide technical, patent, a…
	Hoffmann-La Roche Inc	Cetus Corp	300		CA	US		8731	Provide pharmaceutical and biomedical research services; manufacture pharmaceuticals		Hoffman-La Roche acquired the ownership of polymerase chain reaction (PCR) technology from Cetus Corp. for an aggregate price of $300 million plus royalties of up to $30 million in present value if certain PCR sales levels are exceeded by Roche. Under the agreement, Roche gained all technical, patent and manufacturing rights to all known and unknown fields of use for the PCR owned by Cetus. Cetus…	Cetus was to receive an aggregate cash price of $300 million plus royalties of up to $30 million in present value if certain PCR sales levels are exceeded by Roche.
	Syntex USA	TheraTech Inc			UT	US		2834	Research and development firm engaged in the development of drug delivery systems, specializing in research on transdermal patches		Syntex USA and TheraTech signed an agreement for the joint research and development of Syntex's proprietary drugs using TheraTech's skin surface delivery systems. Under the agreement, TheraTech was to develop and manufacture the new delivery systems for Syntex, and Syntex was to have worldwide marketing rights to all jointly developed drugs. Syntex also agreed to acquire an equity stake in TheraT…	Syntex USA was to acquire an equity stake in TheraTech of an undisclosed size and value. Also, TheraTech was to receive royalties on all sales of jointly developed products.
	Roche Diagnostics Systems	MetPath Inc			NJ	US		8071	Own and operate clinical laboratory		Roche Diagnostic Systems granted Metpath a license to perform in vitro clinical lab testing services using Roche's polymerase chain reaction (PCR) technology-based DNA probe assays. Roche was in the process of acquiring full rights to the PCR technology from Cetus as a result of Cetus' merger with Chiron. Prior to the impending merger, Roche had licensed the technology from Cetus. In addition to …
	F Hoffmann-La Roche Ltd	Organon Teknika BV(Akzo Nobel)				Netherlands		3841	Manufacture healthcare products and equipment; provide related research services		F Hoffman La Roche Ltd. and Organon International B.V. signed an agreement to provide research and development services on serotonin, which is a substance that transmits nerve impulses in the brain and other organs. Serotonin was to be used to treat psychiatric disorders such as depression, anxiety and schizophrenia.
	Genentech Inc	Incyte Pharmaceuticals Inc	14		CA	US		8731	"Provide biological research servicess"		Genentech Inc and Incyte Pharmaceuticals Corp signed an agreement for the joint development of bactericidal/permeability increasing (BPI) protein as a treatment for gram-negative septic shock. Under the agreement, Genetech was to provide Incyte with $14 million to fund the research and development program for the first three years. The $14 million also included milestone-based payments and royalt…
	Chugai Pharmaceutical Co Ltd	Choongwae Pharma Corp	1.54			South Korea		2834	"Choongwae Pharma Corp, located in Seoul, South Korea, manufactures and sells active pharmaceutical ingredients such as Ketoconazole and Itraconazole. Founded in 1945."		Chugai Pharmaceutical Co., Ltd. and Choongwae Pharma Co., Ltd. formed C&C Research Laboratories, a joint venture to provide pharmaceutical product research services. C&C Research Laboratories was capitalized at 200 million Japanese yen($1.54 mil).
	Hoffmann-La Roche Inc	Sigma-Tau SpA				Italy		2834	Sigma-Tau SpA, located in Rome, Italy, manufactures prescription pharmaceuticals intended for final consumption, including biotech products and antibiotics focusing in cardiovascular disease, metabolism, oncology, immunology, and central and nervous system disorders. Founded in 1957.		Hoffman-La Roche and Sigma-Tau Industrie Farmaceutiche Riunite SpA signed an agreement for the joint marketing of Sigma-Tau's acetyl-L-carnitine for the treatment of Alzheimer's disease. The drug had already complete Phase II trials in Europe, and was in trials at Alzheimer's research centers in the United States. Roche said it was to help in the registering of acetyl-L-carnitine, and planned to …
	Hoffmann-La Roche Inc	Organon Teknika BV(Akzo Nobel)				Netherlands		3841	Manufacture healthcare products and equipment; provide related research services		Hoffman La-Roche and Organon Teknika signed an agreement for the joint research and development of pharmaceuticals for the treatment of psychiatric disorders. Any products developed under the agreement were to be available to both companies, but all marketing was to be accomplished separately.
GSK	Genelabs Asia(Pte)Ltd	Diagnostic Biotechnology Pte				Singapore		2835	Manufacture diagnostic tests		Genelabs Asia Pte Ltd (GA) and Diagnostic Biotechnology Pte Ltd (DB) formed a strategic alliance wherein GA licensed DB to utilize its proteins which are used to detect HTLV-I, a virus that causes adult t-cell leukemia, as well as a degenerative neurological disorder in Singapore. This was in exchange for warrants to purchase DB's common stock. GA and DB also developed a diagnostic test that dist…	Genelabs Asia granted Diagnostic Biotechnology HTLV-1 detection proteins technology in exchange for warrants to purchase Diagnostic Biotechnology's common stock
	SmithKline Beecham PLC	Elan Corp PLC				Ireland-Rep		2836	Elan Corp PLC, based in Dublin 2, Ireland, is a neuroscience-based biotechnology company. It focuses on discovering, developing, manufacturing and marketing advanced therapies in neurology, autoimmune diseases, and severe pain. It also manufactures pharmaceuticals. The company was founded in 1969.		Elan has agreed to develop an over-the-counter drug of SmithKline Beecham plc using its SODAS technology for encapsulated products for a drug delivery system to improve the absorption of drugs. SmithKline was to fund development costs and manufacture the product for North America and possibly other countries, at SmithKline's option. Elan was to receive a royalty on sales of the product. Elan's SO…	SmithKline Beecham was to fund development costs and was to pay Elan a royalty on sales
	Glaxo Holdings PLC	Lucky Ltd				South Korea		2819	Manufacture chemicals		Glaxo Holdings and Lucky Ltd. entered into an agreement in which Glaxo was granted worldwide exclusive rights to test, develop, register, and market cephalosporin compounds discovered and patented by Lucky. In addition, the companies were to collaborate on the test- ing and manufacturing processes of the drug. Financial terms of the agreement were not disclosed.
	Glaxo Canada Inc	IAF BioChem International Inc	25			Canada		8731	Provide pharmaceutical research services; manufacture vaccines		IAF BioChem signed an agreement with Glaxo Canada to form an equally-owned joint venture to commercialize therapeutic compounds discovered by IAF for the treatment of cancer and viral diseases. The agreement gave Glaxo access to IAF products in Canada and potentially worldwide. The joint venture company was to assume full operating responsibility for the research, production and marketing of its …	Glaxo was to acquire one million shares of IAF at $12 per share. Glaxo also committed to purchase one million additional shares at prices that ranged from $12.50 to $13.50 per share over an 18-month period for a total investment of $25 million. Glaxo also had a two-year option to purchase approximately two million shares at $15.60 per share.
	Genelabs Technologies Inc	Sandoz AG				Switzerland		2851	Manufacture dyestuffs and pharmaceuticals including self-medications and non- prescription drugs; manufacture optical and opthalmic products including contact lenses; research and develop crop protection products including pesticides; produce nutritional products including baby formula and baby canned foods		Genelabs Technolgies signed a marketing and development agreement with Sandoz concerning Genelabs drug GLQ223. Sandoz would market and develop the drug in America, Canada, and Asian countries. Genelabs will retain worldwide manufacturing rights. GLQ223 is used to treat AIDS.
	Block Drug Co	Chemex Pharmaceuticals Inc	17		NY	US		2834	Manufacture prescription pharmaceuticals intended for final consumption, including biotech products and antibiotics	terminated	Chemex and Block Drug have mutually agreed to terminate their joint venture in the field of dermatology. Originally, Block Drug and Chemex International formed a joint venture for the development, manufacture and marketing of dermatological and gastrointestinal products. The venture's lead drug, called Amlexanox, was used for the treatment of canker sores. Under the terms of the agreement, Chemex…	The joint venture was capitalized at $17 million, to be provided equally by the two companies over the next five years. Management costs and profits would also both be shared equally by the two firms. On June 30, 1994, Chemex sold a 10% stake in the joint venture to Block Drug for $1.7 mil US. Chemex had the right to buy back the 10% share over a "specified period of time."
	Glaxo Holdings PLC	ICOS Corp			WA	US		2836	Biotechnology company		ICOS and Glaxo Holdings agreed to establish a joint venture for ithe development of therapeutic agents to modulate the activity of tissue-specific isozymes of phosphodiesterase. The program was to focus initially on inflammatory and cardiovascular diseases, but could also include respiratory and gastrointestinal disorders. ICOS stated that it would transfer to Glaxo the recent products of its clo…
	Glaxo Holdings PLC	North Carolina Supercomp Ctr			NC	US		3577	Manufacture and wholesale computer hardware		Glaxo and North Carolina Supercomputing Center (NCSC) have entered into a venture to use supercomputers to model and design new pharmaceuticals. Glaxo hopes to reduce the time required to research substances in new pharmaceuticals.
	SmithKline Beecham PLC	Scotgen Ltd				UK		8731	Provide biological research and development services		Scotgen granted a license to SmithKline Beecham for its reshaped human antibodies that act against the respiratory syncytial virus. Both companies were to collaborate on the research and development of the antibodies. SmithKline retained the exclusive rights to market any products resulting from the cooperative effort.
	Burroughs Wellcome Co	NC St U-College of Veterinary			NC	US		8221	College		Burroughs Wellcome and researchers at the North Carolina State University (NCSU) College of Veterinary Medicine jointly developed a small animal model for the screening of possible AIDS drugs. The model used mice with severe combined immunodeficiency syndrome (SCID) that had been engrafted with feline immune system cells. The mice were then injected with feline immunodeficiency virus (FIV), a ret…
	Glaxo Canada Inc	IAF BioChem International Inc				Canada		2834	Manufacture pharmaceutical preparations		IAF BioChem International and Glaxo Canada formed a strategic alliance to provide research and development services of anti-tumor therapeutic products in Canada.
	Glaxo Holdings PLC	Sankyo Europe GmbH				Germany		2834	Manufacture pharmaceutical products; provide biological research services		Glaxo Holdings and Sankyo Europe GmbH, a Sankyo Co affiliate, signed an agreement in principle for joint development of the anti-diabetes drug, CS-045, in Europe. The drug, CS-045, is an oral hypoglycemic agent developed by Sankyo Co Ltd. for the treatment of non-insulin dependent diabetes.
	Glaxo Inc(Glaxo Holdings PLC)	Sandoz AG				Switzerland		2851	Manufacture dyestuffs and pharmaceuticals including self-medications and non- prescription drugs; manufacture optical and opthalmic products including contact lenses; research and develop crop protection products including pesticides; produce nutritional products including baby formula and baby canned foods		Glaxo Inc and Sandoz AG formed a strategic alliance to provide pharmaceutical development and marketing services in the United States. The alliance jointly developed an over-the-counter form of Ranitidine, which is a the active ingredient in Sandoz's Zantac. Sandoz's Zantac is used as an anti-ulcer medication. The agreement stipulated that once an approved form of Ranitidine was approved, Glaxo a…
	Glaxo Inc(Glaxo Holdings PLC)	Amylin Corp			CA	US		8731	Provide commercial research services		Glaxo Inc and Amylin Corp formed a strategic alliance to provide research and development services in the United States. The alliance developed diabetes therapies involving a pancreatic hormone, amylin. Amylin is believed to interact with insulin to regulate carbohydrate metabolism. Amylin officials have disclosed there is evidence that chemical blockers of amylin could be of great value in treat…
	Glaxo Inc(Glaxo Holdings PLC)	Amylin Pharmaceuticals Inc			CA	US		2834	Amylin Pharmaceuticals Inc, headquartered in San Diego, California, is a biopharmaceutical company that manufactures and develops pharmaceuticals and therapeutics based upon peptide analogs, primarily in regulation of glucose metabolism. It also provides research and development services looking to develop novel therapeutics based on amylin, a newly discovered hormone that play a role in glucose …		Amylin Pharmaceuticals Inc and Glaxo Inc, a unit of Glaxo Holdings PLC, have entered into an agreement to jointly research and develop diabetes and obesity therapies using Amylin's research on the pancreatic hormone amylin. Under the agreement, Amylin retained the diagnostic rights to the technology. Financial terms were not disclosed.
?? Andere company in deal text???	SmithKline Beecham PLC	Bonelli e Associati,Pappalardo				Italy		8111	Provide legal services	terminated	Bone Care International and its parent company, Lunar Corporation, ended a licensing agreement with SmithKline Beecham PLC for SmithKline to develop and market Lunar's 1-alpha-hydroxyvitamin D2, a compound under development for the treatment of osteoporosis. SmithKline was to have exclusive marketing rights in the US and all other countries, excluding Japan, Taiwan, Korea, and Canada where Takeda…
	Genelabs Asia(Pte)Ltd	Diagnostic Biotechnology Pte				Singapore		2835	Manufacture diagnostic tests		Genelabs Asia (PTE), Ltd. granted Diagnostic Biotechnology (PTE), Ltd. a license to develop Genelabs' viral diagnostic tests used to detect hepatitis infection, in exchange, for warrants to purchase Diagnostic Biotechnology's common stock. Diagnostic Biotechnology was to market the viral diagnostic tests in the Pacific Rim region where Hepatitis is a leading public health threat.	Genelabs Asia granted Diagnostic Biotechnology viral diagnostic test technology in exchange for warrants to purchase Diagnostic Biotechnology's common stock.
	Genelabs Technologies Inc	Yung Shin Pharm Industry				Taiwan		2834	Yung Shin Pharmaceutical Co Ltd, headquartered in Taiwan, is engaged in the manufacture of pharmaceuticals.		Genelabs Technologies, Inc. and Yung Shin Pharmaceutical Co., Ltd. signed an agreement to form a joint venture to develop, manufacture, and market Genelabs Technologies' GL331 drug, which was to be used as an anti-cancer drug, for the Asian market, except Japan.
	Genelabs Technologies Inc	Inst of Biomed Science Clinica				Taiwan		2834	Manufacture pharmaceutical products; provide biological services		Genelabs Technologies, Inc. and the Institute of Biomedical Sciences of the Academia Cinica signed an agreement to jointly develop, manufacture and market Genelabs Technologies' GL331 drug, which was to be used as an anti-cancer drug, for the Asian market, except Japan.
	Genelabs Technologies Inc	Enzon Inc			NJ	US		2836	Biotechnology company, focusing on the development and commercialization of enhanced therapeutics for life-threatening diseases, through the application of two proprietary platform technologies: PEG and single-chain antibodies		Genelabs Technologies, Inc. and Enzon, Inc. signed an agreement to evaluate the application of Enzon's propreitary drug delivery system in developing modified forms of Genelabs' GLQ223 (trichosanthin). Genelabs' GLQ223 is a protein based therapeutic that was designed to block HIV expression in infected T-cells and infected macrophages without harming uninfected cells.
	SmithKline Beecham PLC	T Cell Sciences Inc			MA	US		2835	T Cell Sciences Inc, headquartered in Cambridge, Massachusetts, is engaged in the manufacture vaccines and medicinal products for cardiovascular, pulmonary and immune disorders. The companys products include compounds that inhibit acute and chronic diseases, T cell activation regulators and therapeutic vaccines.		T Cell Sciences, Inc. and SmithKline Beecham, plc. signed an agreement to jointly develop and market T Cell's sCR1 complement inhibitors, which minimize inappropriate tissue damage that occurs in a number of medical conditions. The participants focused on the use of sCR1 for the treatment of adult respiratory distress syndrome (ARDS). In preclinical animal studies, the participants found sCR1 red…
Novartis	Ciba-Geigy AG	Panlabs International Inc			WA	US		8731	Provide biotechnological research lab services		Ciba-Geigy Ltd and Panlabs International have signed a multiyear agreement to research natural products discovery.
	Ciba-Geigy Ltd,Chiron Corp	Applied Microbiology Inc			NY	US		2836	Research and develop biotechnology products		Applied Microbiology and Ciba-Geigy formed a strategic alliance to provide research and development services of bacteriocin-based topical disinfectants globally.
	Sandoz Pharma AG(Sandoz AG) Sandoz Pharmaceuticals Corp	Dana-Farber Cancer Institute			MA	US		8731	Provide cancer research services		Dana-Farber Cancer Institute, Sandoz Pharma and Sandoz Pharmaceuticals formed a 10-year strategic alliance to provide research and development services of therapeutical treatment of abnormal cancer cell growth and behavior globally.
	Ciba-Geigy Ltd(Ciba-Geigy AG)	Tanox Inc			TX	US		2836	Biotechnology company		Ciba-Geigy Ltd. and Tanox Biosystems Inc formed a strategic alliance to provide research and development services of AIDS therapeutic based on monoclonal antibodies globally.	Tanox was to receive royalties on future product sales.
	Sandoz Pharma AG(Sandoz AG)	Protein Design Labs Inc			CA	US		2836	Biotechnology company		Protein Design Labs Inc and Sandoz Pharma formed a strategic alliance to provide research and development services of humanized mouse monoclonal antibodies globally.
	Sandoz Pharma AG(Sandoz AG)	University Hospital Dijkzight; Mallinkrodt Medical			…; MO	Netherlands; US		8062; 3845	Hospital; Manufacture X-ray contrast media, interventional products, airway catheters, temperature monitoring products, blood and gas vital sign monitoring systems and diagnostic and therapeutic radio pharmaceuticals		IMCERA Group Inc, Mallinckrodt Medical Inc, University Hospital Dijkzight, and Sandoz Pharma formed a strategic alliance to provide research and development services of radiopharmaceutical products globally.
	Ciba-Geigy Corp(Ciba-Geigy AG)	Medtronic Inc			MN	US		3845	Medtronic Inc, located in Minneapolis, Minnesota, manufactures, develops and wholesales medical and surgical devices including neurostimulation systems, drug delivery systems, neurosurgical implant devices, surgical access products, diagnostic and therapeutic systems for chronic pain, neurological, urologic, and gastrointestinal disorders, coronary stents, stent grafts, angioplasty balloons, guid…		Ciba-Geigy Corp, a unit of Ciba-Geigy AG, and Medtronic Inc have agreed to develop a drug/device combination for the treatment of chronic spasticity. Ciba-Geigy provided its injectable baclofen drug, Lioresal, which was to be administered through Medtronic's SynchroMed infusion device. Financial terms were not disclosed.
	Sandoz AG	Genelabs Technologies Inc			CA	US		2834	Manufacture pharmaceutical products; provide biological research services		Genelabs Technolgies signed a marketing and development agreement with Sandoz concerning Genelabs drug GLQ223. Sandoz would market and develop the drug in America, Canada, and Asian countries. Genelabs will retain worldwide manufacturing rights. GLQ223 is used to treat AIDS.
	Ciba-Geigy AG	Chiron Corp			CA	US		2836	Manufacture vaccines, blood testing and biopharmaceutical products	terminated	Chiron terminated its pharmaceutical development joint venture with Ciba-Geigy by acquiring Ciba's 50% stake in the venture. Originally, Chiron Corporation and Ciba-Geigy AG, both pharmaceutical companies, formed Biocine Co., a joint venture to develop and test an insulin-like Growth Factor I, AIDS vaccines, herpes simplex II, influenza, malaria, hepatitis C, and cytomegalovirus vaccines in Switz…	In December 1991, Ciba-Geigy and Chiron reached an agreement which granted Ciba-Geigy the right to acquire a preferred interest in the earnings of Biocine, by investing up to $45 million over the next four years in excess of funds it otherwise would have provided under the existing venture agreement. In December 1994, Ciba acquired a 49.9% stake in Chiron. Ciba agreed to contribute its 50% stake …
	Sandoz Pharmaceuticals Corp	Clinical Technologies Assoc	1.5		NY	US		2834	Research and develop oral delivery systems and pharmaceuticals for patients who cannot take medications orally		Clinical Technologies Associates signed an agreement with Sandoz Pharmaceuticals for the funding of clinical studies for oral forms of injectable drug products using compounds including peptides and mucopolysaccharides, such as insulin and heparin. Under the agreement, Sandoz was to fund the feasibility studies for $250,000. If at the end of the studies the product did not meet Sandoz's pre-deter…	Under the agreement, Sandoz was to pay $250,000 to Clinical Technologies to fund the feasibility study. If the product did not meet Sandoz's predetermined criteria, Clinical Technologies would refund Sandoz an estimated 75% of its money back. If Sandoz approves the product, the two companies would continue their collaboration with the project, estimated at $1 million to $1.5 million. If the produ…
	Ciba-Geigy Ltd(Ciba-Geigy AG)	Affymax NV				Netherlands		2834	Provide pharmaceutical research and development services		Ciba-Geigy and AFFYMAX entered into a research collaboration in which Ciba-Geigy was to fund drug discovery and development work at AFFYMAX on three molecular targets. Under the agreement, AFFYMAX was to use its proprietary technologies, including VLSIPS (Very Large Scale Immobilized Polymer Synthesis), focusing on molecular targets for the treatment of arthritis, cancer, and autoimmune diseases.…	AFFYMAX was to receive funding money, milestone payments during the development process, and royalties on sales of any products discovered under the agreement. Also, AFFYMAX was to receive equity funding money. Actual figures were not released.
	Ciba-Geigy AG	Affymax NV	7.5	0.06		Netherlands		2834	Provide pharmaceutical research and development services	*	Ciba-Geigy and Affymax NV entered into an agreement in which Ciba will fund drug discovery at Affymax and purchase 6% of Affymax's equity shares for $7.5 mil US. Ciba-funded research focused on an immunomodulatory cytokine for autoimmune diseases and inflammation, tyrosine kinases for cancer, and a selected complement factor for adult respiratorydistress syndrome. In addition, Ciba was expected t…	Ciba-Geigy purchased 6% of Affymax's equity shares for $7.5 mil US. Ciba was also expected to pay another $7.5 mil US (13.3 mil Dutch guilders) over the next three years to Affymax NV's affiliate Affymax Technologies NV. Ciba-Giegy funded drug research at Affymax.
	Ciba Vision Corp(Ciba-Geigy)	InSite Vision Inc			CA	US		2836	Manufacture ophthalmic pharmaceutical products		Ciba Vision licensed Durasite system ophthalmic drug technology from Insite Vision Inc. Ciba Vision will develop and market this technology and will take a minority equity stake in Insite Vision. Ciba Vision is a manufacturer of contact lenses and lens cleaners, and is branching out into opthalmic drug manufacture.
	Sandoz AG	Glaxo Inc(Glaxo Holdings PLC)			NC	US		2834	Manufacture pharmaceuticals and vitamins	*	Glaxo Inc and Sandoz AG formed a strategic alliance to provide pharmaceutical development and marketing services in the United States. The alliance jointly developed an over-the-counter form of Ranitidine, which is a the active ingredient in Sandoz's Zantac. Sandoz's Zantac is used as an anti-ulcer medication. The agreement stipulated that once an approved form of Ranitidine was approved, Glaxo a…
	Ciba-Geigy AG	Noven Pharmaceuticals Inc			FL	US		8731	Provide commercial laboratory research services		Noven Pharmaceuticals, Inc. granted Ciba-Geigy Corp. a license to develop and market Noven Pharmaceuticals' transdermal estrogen replacement system, which is used in the treatment of feminine deficiencies. The license was to apply to the United States and Canada. Ciba-Geigy also acquired warrants to purchase an equity stake in Noven Pharmaceuticals and was granted the option to acquire additional…	Ciba-Geigy acquired warrants to purchase an equity stake in Noven Pharmaceuticals and was granted the option to acquire additional warrants in the future to purchase Noven common stock.
	Sandoz Pharma AG(Sandoz AG)	Genetic Therapy Inc			MD	US		2836	Develop delivery systems for human gene therapy;Provide research services		Genetic Therapy, Inc. and Sandoz Phrama, Ltd. signed a three-year agreement to co-develop and market gene-transfer technology. The partners were expected to focus on three projects with different applications for each project. The applications were cancer, cardiovascular disease, and immunology/inflammation including asthma. Genetics Therapy and Sandoz Pharma agreed to provide $13.5 million for t…	Sandoz Pharma financed the agreement through a 6.1% equity stake purchase (470,354 common shares at $21.26) in Genetic Therapy for $10 million. Sandoz also agreed to provide up to $13.5 million in funding over three years.
	Ciba-Geigy AG; Chiron Corp	Sclavo vaccine business	21.5	0.061	CA	US		2836	Manufacture vaccines, blood testing and biopharmaceutical products		Ciba-Geigy AG and Chiron Corp. signed an agreement to form a joint venture to acquire the Sclavo vaccine business, which included all vaccine products, research and technology of Sclavo, and production facilities in Rosia and Siena, Italy. The joint venture was to develop and market pediatric and adult vaccines. In 1991, Sclavo's vaccine business had annual sales of 55 billion Italian lira($49.5 …	In 1991, Sclavo's vaccine business had annual sales of 55 billion Italian lira($49.5 million).
Sanofi-Aventis	Forest Laboratories Inc Rhone-Poulenc SA	Forest Laboratories Inc Rhone-Poulenc Rorer Inc			NY PA	United States United States	Licensing Services Marketing Services	2836	Forest Laboratories Inc, located in New York, New York, manufactures and wholesales prescription pharmaceuticals intended for final consumption, including biotech products and antibiotics for the therapeutic areas of the central nervous, cardiovascular and respiratory systems. The holding company was founded in 1954. Manufacture pharmaceuticals for heart disease, strokes, hypertensive diseases an…		Forest Laboratories acquired from Rhone-Poulenc Rorer the US rights to the thyroid products Armour Thyroid, Levothroid, and Thyrolar. Forest was to pay $85 million for the thyroid products over a period of approximately 2 years, plus royalties on sales which exceed 1990's sales of $26 million. The products were to be used as treatments for thyroid problems.	No	Forest was to pay $85 million for the thyroid products over a period of approximately 2 years, plus royalties on sales which exceed 1990's sales of $26 million.	United States
	Immunex Corp Hoechst AG	Immunex Corp Hoechst-Roussel Pharm			WA NJ	United States United States	Marketing Services Manufacturing Services	2836	Biotechnology company, focusing on the research and manufacturing of immunological therapeutic products Manufacture and wholesale pharmaceuticals		Immunex Corp. and Hoechst-Roussel Pharmaceuticals signed an agreement in which Immunex's yeast granulocyte macrophage-colony stimulating factor (GM-CSF) would be manufactured for Hoechst-Roussel Pharmaceuticals, who in return was expected to market Immunex's yeast GM-CSF. Immunex's yeast GM-CSF was designed to promote the growth of infection-fighting white blood cells and has been approved for us…	No		Supranational
	Hoechst AG Stevens Institute of Tech	Hoechst Celanese Corp(Hoechst) Stevens Institute of Tech			NJ NJ	United States United States	Research & Development Services	3069	Manufacture textile and technical fibers, acetate cigarette filter tow, specialty and bulk chemicals, prescription drugs, veterinary pharmaceuticals, animal feed additives, crop protection products, engineered plastics, polyester film, resins, high density polyethylene, presensitized offset printing plates, dyes and pigments, paints, coatings and sealants; wholesale chemicals, allied products, dr…		Hoechst Celanese and Stevens Institue of Technology signed an agreement to jointly develop a liquid-liquid extraction system. In January 1992, Hoechst Celanese introduced its Liqui-Cel hollow-fiber-membrane liquid-liquid extraction system, which was comprised of three 24-inch long modules, each two inches in diameter. The extraction occured at the point at which the two fluids contact one another…	No		United States
	Roussel-Uclaf SA Ecogen Inc	Roussel-Uclaf SA Ecogen Inc			FF PA	France United States	Licensing Services Research & Development Services Marketing Services	2869	Manufacture pharmaceutical, chemical, and veterinary products Manufacture biological pesticides for forestry, public health, and home garden application.		Ecogen Inc. and Roussel Uclaf have signed agreements regarding licensing, research, development and marketing of Ecogen's bioinsecticide products. Roussel Uclaf will pay Ecogen $12.725 million over the next four years, including $12 million for new product development and $725,000 for license fees. Roussel Uclaf paid Ecogen a non-refundable deposit of $500,000 upon the signing of the agreements a…	No		France
	Hoechst AG Dysan Internationla LP	Hoechst AG Dysan Internationla LP			FF CA	Germany United States	Marketing Services Manufacturing Services Supply Services	3572	Manufacture textile and technical fibers, acetate cigarette filter tow, specialty and bulk chemicals, prescription drugs, veterinary pharmaceuticals, animal feed additives, crop protection products, engineered plastics, polyester film, resins, high density polyethylene, presensitized offset printing plates, dyes and pigments, paints, coatings and sealants; wholesale chemicals, allied products, dr…		Dysan International and Hoechst AG have formed an OEM alliance in order to market magneto-optical disks worldwide. Dysan will use its established distribution network to market the products in over 40 countries. Hoechst will manufacture the product at its Hoechst Ozadisc media factory in Wiesbaden, Germany, which has a current production capacity of over one million disks per year. Magneto-optica…	No		Germany
	Hoechst AG Teijin Ltd	Hoechst Japan Ltd(Hoechst AG) Teijin Ltd		51.00 49.00	FF FF	Japan Japan	Manufacturing Services	2824	Produce proteins from gene modification, as well as other manmade organic fibers; wholesale drugs and chemicals Teijin Ltd, headquartered in Osaka, Japan, is engaged in the manufacture, processing and sale of chemical products. The High-Function Fiber segment is engaged in the manufacture and sale of aramid fiber and carbon fiber products. The Polyester Fiber segment involves in the manufacture a…		To manufacture and market flame-retardant polyester fibers. The fibers were to be marketed in Southeast and East Asia under the Trevira CS brand name. The venture was to be based in Tokyo. The venture was projected to show first year sales of about US$4.4 mil, on production of about 1,000 tons of the fiber. In ensuing years, unit sales were expected to increase by as much as 100% per year. Produc…	Yes	The venture was to be capitalized at 500 mil Japanese yen (US$3.7 mil).	Japan
	Hoechst AG Amgen Inc	Biotech Australia Pty Ltd Amgen Inc			FF CA	Australia United States	Research & Development Services	8731	Manufacture pharmaceuticals Amgen Inc, located in Thousand Oaks, California, manufactures human therapeutics. It develops human therapeutics focused on the development of novel products based on advances in recombinant DNA and molecular biology. Its therapeutics is focused on the treatment of cancer, kidney disease, rheumatoid arthritis, bone disease, and other serious illnesses. The company was …		Biotech Australia and Amgen Inc formed a strategic alliance to provide research and development services of oral protein and peptide therapeutics globally.	No		Supranational
	Rhone-Poulenc SA Armstrong Pharmaceuticals	Rhone-Poulenc Rorer Inc Armstrong Pharmaceuticals			PA CT	United States United States	Manufacturing Services	2834	Manufacture pharmaceuticals for heart disease, strokes, hypertensive diseases and other cardiovascular diseases, infectious diseases and AIDS, depression, Alzheimer's disease and memory disorders, anxiety and panic, sleep disorders, Schizophrenia, migraines, and other central nervous system disorders and pain, beta-2 stimulants and inhaled steroids for asthma, intranasal steroids and antihistamin…			No	The strategic alliance had estimated sales of $7 mil.	United States
	Upjohn Co Hoechst AG	Upjohn Co-Polymer Chemical Hoechst-Roussel Pharm			MI NJ	United States United States	Marketing Services	2834	Manufacture polymer chemicals Manufacture and wholesale pharmaceuticals		Hoechst-Roussel Pharmaceuticals (H-R) and Upjohn agreed to jointly market H-R's Altace, a drug used for the treatment of hypertension. The drug was recently approved by the FDA. H-R hoped that Upjohn would give it the extra marketing strength needed in the highly-competitive market of ACE inhibitors.	No		United States
	IBM Corp Hoechst AG	IBM Corp Hoechst Celanese Corp(Hoechst)			NY NJ	United States United States	Manufacturing Services	3674	International Business Machines Corp {IBM}, located in Armonk, New York, manufacture computer products. It also provides computer programming and advanced information technology solutions services. It also develops computer systems and applications software and manufactures storage systems, microelectronics and computer peripherals, radio and television communications equipment, office machines, …		IBM Corp and Hoechst Celanese formed a strategic alliance to manufacture semiconductors in the United States.	No		United States
	Rhone-Poulenc SA Forest Laboratories Inc	Rhone-Poulenc Rorer Inc Forest Laboratories Inc			PA NY	United States United States	Marketing Services	8742	Manufacture pharmaceuticals for heart disease, strokes, hypertensive diseases and other cardiovascular diseases, infectious diseases and AIDS, depression, Alzheimer's disease and memory disorders, anxiety and panic, sleep disorders, Schizophrenia, migraines, and other central nervous system disorders and pain, beta-2 stimulants and inhaled steroids for asthma, intranasal steroids and antihistamin…		Forest Laboratories and Rhone-Poulenc Rorer formed a strategic alliance to provide marketing services of Micturin, a treatments for urge incontinence and bed-wetting in the United States.	No		United States
	Syntro Corp Hoechst AG	Syntro Corp Hoechst-Roessel Agri-Vet Co			CA NJ	United States United States	Marketing Services	8742	Manufacture vaccines Manufacture agricultural chemicals and veterinarian pharmaceutical preparations		Syntro Corp and Hoechst-Roussel Agri-Vet Co formed a strategic alliance to provide marketing services of genetically engineered poultry vaccines and herpes virus vector medicines in the United States.	No		United States
	Hoechst AG Bayer AG American Medical Association	Hoechst AG Bayer AG American Medical Association		33.30 33.30 33.30	FF FF IL	Germany Germany United States	Manufacturing Services	2834	Manufacture textile and technical fibers, acetate cigarette filter tow, specialty and bulk chemicals, prescription drugs, veterinary pharmaceuticals, animal feed additives, crop protection products, engineered plastics, polyester film, resins, high density polyethylene, presensitized offset printing plates, dyes and pigments, paints, coatings and sealants; wholesale chemicals, allied products, dr…		Hoechst AG, Bayer AG, the American Medical Consortium, and several universities in Europe and the United States have formed a joint venture to manufacture pharmaceuticals and medicines in the Soviet Union. The new company, Intermedfarm, will focus on sedatives, anti-tumor drugs, and cardiovascular drugs, and will also manufacture diagnostic and medical equipment.	Yes		Soviet Union
	Rhone-Poulenc SA Optimal Pharmacy	Institut Merieux SA Immune Response Corp			FF CA	France United States	Supply Services	2836	Manufacture vaccines, chemicals, pharmaceuticals, agricultural chemicals, synthetic fibers, and polyester film Provide and develop products that stimulate and regulate the immune system in order to treat life threatening and crippling diseases, such as therapies to induce specific immune responses for the treatment of HIV, autoimmune diseases and cancer		The Immune Response Corporation signed a supply agreement with Institut Merieux covering Immune Response's AIDS immunotherapeutic.	No		Supranational
	Upjohn Co Hoechst AG	Upjohn Co-Polymer Chemical Hoechst-Roussel Pharm			MI NJ	United States United States	Marketing Services	8742	Manufacture polymer chemicals Manufacture and wholesale pharmaceuticals		Hoechst-Roussel Pharmaceuticals and Upjohn Co. agreed to jointly develop and market Hoechst-Roussel's glimepiride, an oral medication for non-insulin dependent diabetics. Glimepiride, a second generation sulfonylurea, is an advanced form of Hoechst AG's DiaBeta (glyburide) oral antidiabetic product. The two companies plan to concentrate their marketing effort in the United States.	No		United States
	WSiS BIOMED Sp z o o Federation Nationale Sanguine Rhone-Poulenc SA	WSiS BIOMED Sp z o o Federation Nationale Sanguine Pasteur Merieux(Inst Merieux)		33.00 33.00 33.00	FF FF FF	Poland France France	Manufacturing Services	2836	Wytwornia Surowic i Szczepionek BIOMED Sp z o o, located in Warsaw, Poland, is a manufacturer of biological products. Manufacture biological products Manufacture and develop vaccine drugs		Federation Nationale de Transfusion Sanguine and Pasteur-Merieux Serums et Vaccins, both of France, and Biomedwysis of Poland formed Biopharm International, a joint venture that would specialize in plasma fractionation and human vaccine production.	Yes		Poland
	Rhone-Poulenc SA UCB SA	RTZ Chemicals Ltd UCB SA		49.90 50.10	FF FF	United Kingdom Belgium	Manufacturing Services	2822	Manufacture surface finishing chemicals and industrial chemicals UCB SA, based in Brussels, Belgium, manufactures pharmaceuticals. It is dedicated to research, development and commercialization of pharmaceutical and biotechnology products for central nervous system disorders, allergy, respiratory diseases, immune and inflammatory disorders and oncology. The company was founded in 1928.	Terminated	Union Chimique Belge SA terminated its joint venture formed with RTZ Chemicals, a unit of French state owned Rhone-Poulenc SA, to manufacture curable resins which were used in printing inks, varnishes and adhesives by acquiring its 49.9% stake in Radcure Specialties SA, the venture. Radcure had operated plants in the US, Belgium, Spain and Korea.	Yes		Belgium
	Hoechst AG China National Tobacco Corp	Hoechst Celanese Tech Fibers China National Tobacco Corp		50.00 50.00	NC FF	United States China	Marketing Services Manufacturing Services	2821	Manufacture textile fabrics, polyester fibers,technical fibers,and industrial chemicals China National Tobacco Corp, located in China, produces tobacco and wholesales cigarettes.		Hoechst Celanese and China National Tobacco have agreed to form a joint venture to manufacture cellulose acetate tow and flake. The venture was to produce 25,000 metric tons of acelate. Site evaluations at four different province in China were to have started in May of 1991. The joint venture was finalized in June 1993. Production was scheduled to begin in 1994.	Yes		China
	Wilbur-Ellis Co Rhone-Poulenc SA	Wilbur-Ellis Co Rhone-Poulenc Agrochemie			CA FF	United States France	Research & Development Services	8731	Manufacture agricultural chemicals; wholesale farm chemicals and supplies, electrical apparatus and equipment, and construction and mining equipment Manufacture pharmaceuticals, biological products, and agricultural chemicals		Rhone-Poulenc Agrochemie and Wilbur-Ellis agreed to develop and market agricultural chemicals for plant growth regulation. The five-year deal grants Wilbur-Ellis rights to market Prep and Larvin, two insecticides for cotton crops, in the USSR.	No		Supranational
	Hoechst AG Saudi Basic Industries Corp Panhandle Eastern Corp	Hoechst Calanese Chemical Saudi Basic Industries Corp Panhandle Eastern Corp		33.00 34.00 33.00	TX FF TX	United States Saudi Arabia United States	Manufacturing Services	2869	Manufacture industrial organic chemicals Manufacture and wholesale petroleum refined chemicals and products, including ammonia, polyethylene, styrene, ethylene dichloride, olefins, high-density polyethylene, low-density polyethylene, monoethylene glycol, polypropylene, ethane, plastics and fertilizers Gas and natural gas liquids exploration and production; provide natural gas transmission, liquef…		Hoechst Celanese Chemical Group, a subsidiary of Hoechst Celanese Corp which is in turn owned by Hoechst AG transferred its share of marketing and sales in its methanol joint venture, Saudi Arabian Basic Industries Corp(Sabic) in Sep 1993. The joint venture, National Methanol Co(Ibn Siba) was formed between Hoechst Celanese Chemical Group, Sabic and Panhandle Eastern and produced 900,000 metric t…	Yes	Hoechst Celanese Chemical Group transfered its share of marketing and sales in its joint venture with Saudi Arabian Basic Industries (Sabic) and Panhandle Eastern to Sabic.	Saudi Arabia
	Genzyme Corp Toyobo Co Ltd	Genzyme Corp Toyobo Co Ltd			MA FF	United States Japan	Licensing Services Retail & Wholesale Services Marketing Services	6794	Genzyme Corp, located in Cambridge, Massachusetts, is a biotechnology company operating through 5 segments: Renal, Therapeutics, Transplant, Biosurgery, and Genetics. The Renal segment manufactures, and distributes products that treat patients suffering from renal diseases. The Therapeutics segment provides Cerezyme/Ceredase, an enzyme replacement therapy for the treatment of Gaucher disease; Fab…	Completed/Signed	Genzyme Corp (GC) and Toyobo Ltd (TL) formed a strategic alliance wherein GC licensed TL to market and sell its Plasminer recombinant t-PA product in Japan. GC was expected to receive royalties on the sale of the drug and was used to dissolve cardiovascular blockages in treating coronary thrombolysis in acute myocardial infarction.	No	Genzyme was to receive royalties on the sales of Plasminer.	Japan
	Behring Henning Berlin GmbH	Behring Henning Berlin GmbH			FF FF	Germany Germany	Research & Development Services	8731	Manufacture luminescent immunoassay diagnostics Manufacture pharmaceutical products		Behring (BH) and Henning Berlin AG (HB) formed a strategic alliance to provide research and development service in Germany. BH and HB agreed to cooperate in the development of the HB's luminescent immunoassay diagnostics line.	No		Germany
	Rhone-Poulenc SA Charles River Breeding Labs	Institut Merieux SA Charles River Breeding Labs			FF MA	France United States	Research & Development Services	8731	Manufacture vaccines, chemicals, pharmaceuticals, agricultural chemicals, synthetic fibers, and polyester film Provide laboratory animal breeding services		Charles River Laboratories, a unit of Bausch & Lomb, acquired a 55% stake in Iffa-Credo, a unit of stake-controlled Rhone-Poulenc subsidiary Institut Merieux, in an effort to cooperate in biomedical research and development.	No	Charles River Laboratories was to acquire a 55% stake in Iffa-Credo.
	Branco Weiss SangStat Medical Corp	Branco Weiss SangStat Medical Corp			FF CA	Switzerland United States		2836	Provide educational services Manufacture suppressant drugs for organ transplant patients		Branco Weiss invested in SangStat Medical as part of a $4 million first stage financing round. SangStat Medical produces suppressant drugs for organ transplant patients.	No		United States
	Rhone-Poulenc SA Soc Nationale Elf Aquitaine	Pasteur Merieux(Inst Merieux) Elf Sanofi SA		50.00 50.00	FF FF	France France		3825	Manufacture and develop vaccine drugs Manufacture pharmaceuticals, cosmetics, perfumes, and food additives		To develop diagnostics preparations.	Yes		France
	Takeda Pharmaceutical Co Ltd Roussel-Uclaf SA	Takeda Pharmaceutical Co Ltd Roussel-Uclaf SA		40.00 60.00	FF FF	Japan France	Manufacturing Services	5122	Takeda Pharmaceutical Co Ltd, headquartered in Osaka, Japan, manufactures and wholesales pharmaceutical products for treatment in the areas of areas of allergy, cardiovascular, central nervous system, diabetes, gastrointestinal, gout, infection, inflammation, interleukin, oncology, osteoporosis, and urology and gynecology, as well as offers vaccines and vitamins.. The company was founded in 1781.…	Terminated	In October 1992, Takeda Chemical Industries disclosed that it was going to withdraw from an equally-owned joint venture formed with Roussel Uclaf called Laboratoires Takeda by agreeing to acquire Roussel Uclaf's 45% stake in January 1993. The joint venture had been formed to market a lansoprazole anti-ulcer drug in France under the Ogast brand name. Roussel was to have manufactured the drug with …	Yes		France
	Genzyme Corp Tufts University	Genzyme Corp Tufts University			MA MA	United States United States	Research & Development Services		Genzyme Corp, located in Cambridge, Massachusetts, is a biotechnology company operating through 5 segments: Renal, Therapeutics, Transplant, Biosurgery, and Genetics. The Renal segment manufactures, and distributes products that treat patients suffering from renal diseases. The Therapeutics segment provides Cerezyme/Ceredase, an enzyme replacement therapy for the treatment of Gaucher disease; Fab…		Genzyme Corp. and Tufts University jointly developed goats that secrete a version of tissue plasminogen activator (TPA). The goats were given a gene for TPA, causing its production in the mammary glands. This version of TPA, which was used to clear blood clots in heart attack victims, was untested in humans. In January 1992, the two parties announced that they had also genetically engineered mice…	No
	Roussel-Uclaf SA SPIMACO	Roussel-Uclaf SA SPIMACO			FF FF	France Saudi Arabia	Licensing Services Manufacturing Services	6794	Manufacture pharmaceutical, chemical, and veterinary products Saudi Pharmaceutical Industries & Medical Appliances Corp, located in Riyadh, Saudi Arabia, Manufactures and wholesales pharmaceuticals such as antibiotics, antiseptics, anti-inflammatory, analgesics, anti-ulcer, anitussive, anti-hypertensive and anti-anemia which serve customers such as medical centers, hospitals and pharmacies, locat…		Roussel and Saudi signed a pharmaceuticals licensing agreement whereby Saudi manufactured drugs under license at Qassim. The deal included antibiotics and other drugs.	No		Supranational
	Advanced Clinical Technology Hoechst AG	Advanced Clinical Technology Canadian Hoechst Ltd			MA FF	United States Canada	Licensing Services	6794	Manufacture diagnostic products and kits Manufacture and wholesale pharmaceutical and diagnostic products		Advanced Clinical Technologies (ACT) granted Hoechst Canada a license to its Periocheck enzyme activity kit, which monitors patient response following treatment for periodontal disease. Under the agreement, Hoechst Canada had the exclusive rights to commercialize the kits in Canada.	No		Supranational
	Syntro Corp Hoechst AG	Syntro Corp Hoechst Veterinaer(Hoechst AG)			CA FF	United States Germany	Licensing Services	6794	Manufacture vaccines Manufacture and wholesale pharmaceuticals		Syntro granted Hoechst Veterinar a license to its IBR/Marker cattle vaccine for infectious bovine rhinotracheitis, a respiratory and reproductive cattle disease. Under the agreement, Hoechst Veterinar was to pay Syntro license fees, as well as manufacturing and sales royalties, once IBR/Marker received European regulatory approval. Syntro retained the right to market IBR/Marker in the United Stat…	No	Hoechst Veterinar was to pay Syntro a licensing fee, as well as sales and manufacturing royalties once it received European regulatory approval for the vaccine.	Supranational
	Hoechst AG Dohmen	Hoechst Italia SpA(Hoechst AG) Dohmen		49.00 51.00	FF FF	Italy Germany		3111	Manufacture pharmaceutical products, diazo paper, surfactants, synthetic resins, emulsions, pigments for coloring plastics and industrial paints and primers Investment firm		Hoechst Italia and Dohmen agreed to establish a joint venture in Milan, Italy for leather processing and dyeing. Hoechst was to hold 49% of the venture, while Dohmen was to hold 51% of the venture. Startup was scheduled for January, 1992.	Yes	Hoechst Italia was to hold 49% of the venture, while Dohmen was to hold 51% of the venture	Italy
	The Dow Chemical Co Caisse de Depot et Placement Rhone-Poulenc SA	Marion Merrell Dow Inc Caisse de Depot et Placement Merieux Canada Holdings Ltd		85.4	MO FF FF	United States Canada Canada	Marketing Services Manufacturing Services	5122	Manufacture pharmaceuticals and surgical appliances and supplies Caisse de Depot & Placement du Quebec, located in Quebec, Quebec, provides fund management services. The fund specializes in real estate, business financing, equity markets, fixed income, absolute return, analysis and optimization. The company also operates as a private equity firm. It also has office in New York, US, Beijing China,…	Terminated	The joint venture was terminated when Marion Merrell Dow(MMD) acquired the other shares it did not already own. The agreement stated that Marion Merrell Dow (MMD) would purchase Caisse de depot et placement du Quebec's 14% interest in Nordic Laboratories, a joint venture originally held by MMD, Caisse, and Merieux Canada. MMD was to combine the management of Merrell Dow Pharmaceuticals, its affil…	Yes	Marion Merrell Dow purchased Caisse de depot et placement du Quebec's 14.6% interest in Nordic Laboratories.	Canada
	Takara Shuzo Co Ltd Hoechst AG	Takara Shuzo Co Ltd Hoechst AG			FF FF	Japan Germany	Marketing Services	5122	Produce alcoholic beverages and food;manufacture specialty biomedical products Manufacture textile and technical fibers, acetate cigarette filter tow, specialty and bulk chemicals, prescription drugs, veterinary pharmaceuticals, animal feed additives, crop protection products, engineered plastics, polyester film, resins, high density polyethylene, presensitized offset printing plates, dyes and pi…		Takara Shuzo Co Ltd. has granted European marketing rights to Hoechst AG for its NKT-01 immunosuppressant, which is said to cause fewer toxicity complications after organ transplants.	No
	Rhone-Poulenc SA Hoechst AG	Rhone-Poulenc SA Hoechst AG		60.00 40.00	FF FF	France Germany		2819	Manufacture industrial chemicals, cosmetics, insecticides, cleaning preparations and fibers Manufacture textile and technical fibers, acetate cigarette filter tow, specialty and bulk chemicals, prescription drugs, veterinary pharmaceuticals, animal feed additives, crop protection products, engineered plastics, polyester film, resins, high density polyethylene, presensitized offset printing plates…	Terminated	Hoechst AG and Rhone-Poulenc terminated their joint venture, RV Chemicals Ltd., when Rhone-Poulenc sold Hoechst its 60% stake. The remaining 40% would continue to be held by Hoechst Celanese. RV Chemicals was formed in 1978 to manufacture sodium hydrosulfite, a reducing agent used in paper pulp bleaching and textile dyeing. The original owners of the joint venture were RTZ Chemicals, now part of …	Yes		United Kingdom
	AGA AB Hoechst AG	AGA AB Hoechst AG		50.00 50.00	FF FF	Sweden Germany		2813	Manufacture industrial and medical gases: provide refrigeration services Manufacture textile and technical fibers, acetate cigarette filter tow, specialty and bulk chemicals, prescription drugs, veterinary pharmaceuticals, animal feed additives, crop protection products, engineered plastics, polyester film, resins, high density polyethylene, presensitized offset printing plates, dyes and pigments…		AGA AB and Hoechst AG formed a joint venture for the supply of industrial gases to AGA's new air separation plant in the United Kingdom. Construction on the new plant was expected to be completed by the end of 1993. The joint venture was equally-owned by the two parties.	Yes		United Kingdom
	Roussel-Uclaf SA Ajinomoto Co Inc	Roussel-Uclaf SA Ajinomoto Co Inc		50.00 50.00	FF FF	France Japan	Marketing Services	5122	Manufacture pharmaceutical, chemical, and veterinary products Ajinomoto Co Inc, located in Tokyo, Japan, produces and wholesales food seasonings. The company operates in Asia; Europe and America through affiliates and subsidiaries. The company operates in six business segments. The Domestic Food segment manufactures and sells seasonings and processed food, delicatessen and bakery products, frozen…		Roussel-Uclaf, a majority-owned unit of Hoescht AG, signed an agreement to merge its Japanese pharmaceutical trading subsidiary Roussel Medica, with Morishita laboratories, a majority-owned affiliate of Ajinomoto to form an equally-owned joint venture company. Roussel was to merge its sales of Surgam, Rythmodan, and Cefotax with Morishita'a sales of amino acids, antibiotics, cancer treatments and…	Yes	The joint venture company was to be capitalized at $51.36 mil US (6.73 bil Japanese yen/293.5 mil French francs). It was to have 30 million shares, with each company holding 9 million shares and the remaining 12 million to be held by others. Sales were estimated to reach $402.45 mil USD (52.74 bil/2.3 bil).	France Japan
	Genzyme Corp Hoechst AG	Genzyme Corp Behringwerke AG(Hoechst AG)			MA FF	United States Germany	Licensing Services Marketing Services Manufacturing Services	5122	Genzyme Corp, located in Cambridge, Massachusetts, is a biotechnology company operating through 5 segments: Renal, Therapeutics, Transplant, Biosurgery, and Genetics. The Renal segment manufactures, and distributes products that treat patients suffering from renal diseases. The Therapeutics segment provides Cerezyme/Ceredase, an enzyme replacement therapy for the treatment of Gaucher disease; Fab…		Genzyme Corp licensed from Behringwerke AG the patent rights and technology for the manufacture, distribution, and sales of a direct amylase substrate useful as a diagnostic reagent for assaying alpha amylase to determine pancreatic function. The patent covered 2-chloro-nitrophenyl maltotrioside, a substrate which is hydrolysed directly by alpha amylase without the need for auxiliary enzymes. The…	No
AstraZeneca	US Bioscience Inc United States of America	US Bioscience Inc United States of America			PA DC	United States United States	Licensing Services Research & Development Services	6794	Manufacture pharmaceuticals; provide research services National government		The U.S. Government has granted an exclusive license to U.S. Bioscience, Inc. for its patented trimetrexate, a compound found to be effective in the treatment of Pneumocystitis carinii pneumonia. Trimetrexate was initially under development as an anticancer agent until it was discovered to be an effective drug for treating life-threatening infections in AIDS patients. U.S. Bioscience will pursue …	No		United States
	Mogen International NV Upjohn Co	Mogen International NV Asgrow Seed Co			FF MI	Netherlands United States	Licensing Services	2833	Provide plant biotechnology research services Produce and wholesale ornamental plants		Asgrow Seed Co., a unit of Upjohn Co., signed a collaborative research and licensing agreement with MOGEN International NV in developing fungal resistance in horticultural crops.	No		Supranational
	MedImmune Inc Merck & Co Inc	MedImmune Inc Merck & Co Inc			MD NJ	United States United States	Licensing Services Research & Development Services Funding Services	2836	Manufacture vaccines which include Synagis (palivizumab), Ethyol (amifostine), FluMist (Influenza Virus Vaccine Live, Intranasal), and CytoGam (cytomegalovirus immune globulin intravenous (human)) and with additional products in clinical testing; provide research and development services to discover, develop, manufacture and market products that treat or prevent infectious disease, cancer and inf…		MedImmune Inc. and Merck & Co. completed their agreement to form a program to develop monoclonal antibodies, which are versions of naturally occuring immune molecules, for the prevention of infection by the AIDS virus. The partners were expected to tailor monoclonal antibodies to target a portion of the human immunodeficiency virus (HIV type 1). The agreement called for Merck to pay MedImmune abo…	No	Under the agreement, Merck was to pay MedImmune an estimated US$13 million over the next three years to fund development.	United States
Abbott	Abbott Laboratories American Home Products Corp	Abbott Laboratories Lederle Labs(Amer Cyanamid Co)			IL NJ	United States United States	Licensing Services Marketing Services	5122	Abbott Laboratories, headquartered in Abbott Park, Illinois, manufactures and wholesales general pharmaceuticals and medical equipment. The company operates through its four divisions namely, Pharmaceutical Products, which offers adult and pediatric pharmaceuticals; Diagnostic Products, responsible for providing diagnostic systems and tests for blood banks, hospitals, commercial laboratories, phy…		Abbott Labs has entered into a licensing agreement with Lederle Labs, a unit of American Cyanamid, in which Lederle received the rights to jointly market Abbott's synthetic broad-spectrum fluoroquinolone antimicrobial, tosufloxacin. Lederle received a worldwide marketing license, excluding the US and Japan. Financial terms were not disclosed.	No		Supranational
	Merck KGaA Abbott Laboratories	Merck KGaA Abbott Laboratories			FF IL	Germany United States	Research & Development Services	8731	Merck KGaA, located in Darmstadt, Germany, manufactures and wholesales pharmaceuticals, specialty chemicals, and cosmetic pigments. The company operates under four divisions: Merck Serono (biopharmaceuticals), Consumer Health (over-the-counter pharmaceuticals), Performance Materials (high-tech chemicals) and Merck Millipore (products for pharmaceutical research and biotechnology). It also serves …		Abbott Laboratories Inc and E Merck formed a strategic alliance to provide research and development services of clinical chemistry test reagents and instrument systems globally.	No		Supranational
	Inforum Inc Abbott Laboratories	Inforum Inc Abbott Laboratories			TN IL	United States United States	Software Development Services	7372	Provide marketing planning and decision support products and services to hospitals Abbott Laboratories, headquartered in Abbott Park, Illinois, manufactures and wholesales general pharmaceuticals and medical equipment. The company operates through its four divisions namely, Pharmaceutical Products, which offers adult and pediatric pharmaceuticals; Diagnostic Products, responsible for providing di…		Inforum and Abbott Laboratories Inc formed a strategic alliance to develop healthcare database and software products in the United States.	No		United States
	American Home Products Corp Abbott Laboratories	Lederle Labs(Amer Cyanamid Co) Ross Laboratories			NJ IL	United States United States	Marketing Services	5122	Provide medical research services Manufacture pharmaceuticals		Lederle Laboratories, a subsidiary of American Cyanamid Co, and Ross Labs, a subsidiary of Abbott Labs, have signed an agreement in which Lederle Labs was to market a generic version of Ross Lab's Pediazole, an antibiotic for children, under the Lederle label. Financial terms were not disclosed. A similar agreement was signed previously by both companies to co-promote Lederle's Suprax oral antibi…	No		United States
	Novo Nordisk Fonden International Murex Tech Corp	Novo Nordisk A/S Murex Diagnostics Inc			FF NC	Denmark United States	Licensing Services	2835	Novo Nordisk As, located in Bagsvaerd, manufactures and wholesales pharmaceutical and health care products. The company operates through two segments namely: Diabetes Care and Biopharmaceuticals. Diabetes care segment includes discovery, development and manufacturing of products within the areas of insulin and delivery systems and oral antidiabetic products (OAD). Biopharmaceuticals segment inclu…	Completed/Signed	Novo Nordisk A/S and Murex Biologicals Inc signed a nonexclusive cross-licensing agreement covering Murex's single-use diagnostic system (SUDS).	No		Supranational
	Unimed Pharmaceuticals Inc Technofarna SA	Unimed Pharmaceuticals Inc Technofarna SA			NJ FF	United States Angola	Licensing Services	6794	Manufacture pharmaceuticals Investment firm		Unimed Inc. has granted an exclusive license to Tecnofarma SA for its Marinol drug for use in the treatment of nausea associated with cancer chemotherapy. Under the agreement, Tecnofarma will pay Unimed a licensing fee upon registration of Marinol in Argentina, and will purchase all Marinol supplies from Unimed.	No		Supranational
	Innogenetics NV Dominion Biologicals Ltd	Innogenetics Inc Dominion Biologicals Ltd			GA FF	United States Canada	Licensing Services Marketing Services	2835	Manufacture vacines, pharmaceuticals, and other biotechnology products Manufacture monoclonal antibody diagonstic systems for hospitals and medical laboratories		Dominion Biologicals signed a cross-licensing and distribution agreement with Innogenetics for the marketing and sale of Innogenetics' diagnostic and therapeutic products in the American and Canadian human healthcare markets. Under the agreement, Dominion was responsible for the sales and distribution of Innogenetics' complete line of HIV screening and confirmatory tests which detected both HIV-1…	No		Canada
	Microtek Research and Dvlp Ltd International Murex Tech Corp	Microtek Research and Dvlp Ltd International Murex Tech Corp			FF FF	Canada Canada	Licensing Services	6794	Provide commercial research services Manufacture in-vitro test systems to detect, monitor and screen for infectious diseases and other medical conditions		Murex Corp. and Microtek Research and Development Ltd. signed a cross-licensing agreement for the manufacture and sale of DNA probes and other related diagnostic tests. The agreement provides Microtek with a non-exclusive license to Murex's SUDS (Single Use Diagnostic System) technology and DNA probe technology. In return, Murex receives the rights to manufacture and market any products developed…	No		Canada
	International Murex Tech Corp Innogenetics NV	Murex Diagnostics Inc Innogenetics NV			NC FF	United States Belgium	Licensing Services Marketing Services	6794	Manufacture diagnostic tests Manufacture vacines, pharmaceuticals, and other biotechnology products		Innogenetics NV signed an agreement to license and market Murex Biologicals' microwell and confirmatory tests for HIV-1/HIV-2 screening.	No		Supranational
	Groupe Limagrain SA Abbott Laboratories	BioTechnica International Inc Abbott Laboratories			KS IL	United States United States	Licensing Services	6794	Manufacture periodontal disease diagnostic products; research and develop genetically engineered plants and microbial inoculants Abbott Laboratories, headquartered in Abbott Park, Illinois, manufactures and wholesales general pharmaceuticals and medical equipment. The company operates through its four divisions namely, Pharmaceutical Products, which offers adult and pediatric pharmaceuticals; Dia…		BioTechnica International Inc has sold its LCR diagnostics technology rights to Abbott Laboratories. The companies have collaborated in the development of LCR technology since mid-1989. Terms of the agreement were not disclosed. BioTechnica has been using LCR technology to develop value-added corn, seed, and grain products.	No		United States
	Unimed Pharmaceuticals Inc Lacer SA	Unimed Pharmaceuticals Inc Lacer SA			NJ FF	United States Spain	Licensing Services Marketing Services Supply Services	2834	Manufacture pharmaceuticals Lacer SA, located in Barcelona, Spain, manufactures pharmaceuticals. Its industrial facilities are located on the Parc Tecnolgic del Valls industrial estate in the town of Cerdanyola. The company was founded in 1953.		Unimed and Lacer S.A. have signed a licensing and supply agreement. Lacer will pay Unimed a fee to market Unimed's product Marinol in Spain, Portugal and Central America. Marinol is currently being used for the treatment of cancer chemotherapy, and is undergoing clinical trials for use in appetite stimulation, particularly among AIDS patients.	No		Spain United States
	Abbott Laboratories Sherwood Medical(Brunswick)	Abbott Laboratories Sherwood Medical(Brunswick)			IL IL	United States United States	Manufacturing Services Marketing Services	3845	Abbott Laboratories, headquartered in Abbott Park, Illinois, manufactures and wholesales general pharmaceuticals and medical equipment. The company operates through its four divisions namely, Pharmaceutical Products, which offers adult and pediatric pharmaceuticals; Diagnostic Products, responsible for providing diagnostic systems and tests for blood banks, hospitals, commercial laboratories, phy…	Completed/Signed	Abbott Laboratories and Sherwood Medical signed an agreement for the joint manufacture and marketing of infection control products for the health care industry. The agreement included Abbott's LifeShield Blunt Cannula needlestick prevention device for use in intravenous therapy, which would be available through either Sherwood or Abbott, and Sherwood's Monoject Safety Syringe, which would be in A…	No		United States
	Monsanto Co Hokuriku Seiyaku Co Ltd	GD Searle & Co(Monsanto Co) Hokuriku Seiyaku Co Ltd		50.00 50.00	IL FF	United States Japan	Manufacturing Services	2836	Manufacture pharmaceuticals, NutraSweet and various consumer products Manufacture pharmaceuticals	Completed/Signed	GD Searle acquired a 12.25% stake in Hokuriku Seiyaku for $106 million, or 14.392 billion yen. Searle's purchase of 6 million shares made it the largest single shareholder in Hokuriku. The two companies had collaborated before when Searle licensed Hokuriku's lomefloxacin in 1987. The agreement was part of Searle's strategy to increase its market presence in Japan.	Yes	Searle acquired the 12.25% stake for $106 million, or 14.392 billion Japanese yen. The purchase price was approximately $17.67 per share for the 6 million shares.	United States Japan
	ICI PLC Abbott Laboratories	ICI Pharmaceuticals(ICI PLC) Abbott Laboratories			DE IL	United States United States	Marketing Services	5122	Manufacture pharmaceutical products Abbott Laboratories, headquartered in Abbott Park, Illinois, manufactures and wholesales general pharmaceuticals and medical equipment. The company operates through its four divisions namely, Pharmaceutical Products, which offers adult and pediatric pharmaceuticals; Diagnostic Products, responsible for providing diagnostic systems and tests for blood banks, hos…	Completed/Signed	Abbott Labs and ICI Pharmaceuticals, a unit of Imperial Chemical Industries, entered into an agreement to jointly market and promote Abbott's quinolone antibiotic temafloxacin in the United States under the name Omniflox, in the United Kingdom under the name Teflox, and in Sweden and Germany under the name Temac. They were also slated to co-market the product in Italy and Spain. However, as of Ju…	No		Italy Spain United States United Kingdom Sweden Germany
	Abbott Laboratories Taisho Pharmaceutical Co Ltd	Abbott Laboratories Taisho Pharmaceutical Co Ltd			IL FF	United States Japan	Licensing Services	2836	Abbott Laboratories, headquartered in Abbott Park, Illinois, manufactures and wholesales general pharmaceuticals and medical equipment. The company operates through its four divisions namely, Pharmaceutical Products, which offers adult and pediatric pharmaceuticals; Diagnostic Products, responsible for providing diagnostic systems and tests for blood banks, hospitals, commercial laboratories, phy…	Completed/Signed	Abbott Laboratories granted Taisho Pharmaceutical Co. a license to Klancid, an anti-infective.	No		Japan
	Abbott Laboratories H Lundbeck A/S	Abbott Laboratories H Lundbeck A/S			IL FF	United States Denmark	Licensing Services Research & Development Services Marketing Services Manufacturing Services	2834	Abbott Laboratories, headquartered in Abbott Park, Illinois, manufactures and wholesales general pharmaceuticals and medical equipment. The company operates through its four divisions namely, Pharmaceutical Products, which offers adult and pediatric pharmaceuticals; Diagnostic Products, responsible for providing diagnostic systems and tests for blood banks, hospitals, commercial laboratories, phy…	Completed/Signed	Abbott Laboratories licensed exclusive U.S. development, manufacturing and marketing rights from H. Lundbeck for Sertindole, an antipsychotic drug for the treatment of schizophrenia. Abbott was to conduct Phase II studies, as Phase I studies had been completed by Lundbeck. Sertindole has a unique method of action which offers an additional treatment option for schizophrenia without serious side e…	No		Denmark United States
	Unimed Pharmaceuticals Inc Keun Wha Pharmaceutical Ltd	Unimed Pharmaceuticals Inc Keun Wha Pharmaceutical Ltd			NJ FF	United States South Korea	Licensing Services Manufacturing Services	6794	Manufacture pharmaceuticals Manufacture pharmaceuticals	Completed/Signed	Unimed, Inc. granted Keun Wha Pharmaceutical Co. a license to manufacture Unimed's marinol antinausea drug, used by cancer patients, in South Korea. The agreement called for Keun Wha to finance clinical work and obtain product registration in South Korea. Kuen Wha was also expected to pay Unimed a licensing fee and any registration fees, and later purchase Marinol from Unimed. Unimed disclosed th…	No		South Korea
	Unimed Pharmaceuticals Inc Debiopharm SA	Unimed Pharmaceuticals Inc Debiopharm SA			NJ FF	United States Switzerland	Research & Development Services Funding Services	2834	Manufacture pharmaceuticals Debiopharm SA, located in Lausanne, Switzerland, is a manufactures biopharmaceuticals. The company is a specialist in promising biologics and small molecule drugs. The company was founded in 1979.	Completed/Signed	Unimed, Inc. and Debiopharm S.A. signed an accord for the European co-development of Unimed's Marinol, an anti-nausea pharmaceutical to treat cancer chemotherapy patients. Debiopharm was to manage and finance all studies required to develop a regulatory dossier and gain marketing approval of Marinol in Europe. Unimed's Marinol had been in the process of undergoing clinical trials for appetite sti…	No		United States Swaziland
Merck	Syntro Corp Protein Polymer Technologies	Syntro Corp Protein Polymer Technologies			CA CA	United States United States	Licensing Services Research & Development Services	2836	Manufacture vaccines Protein Polymer Technologies Inc provides biomedical research services, engaged in the development and production of proprietary protein-based biomaterials. The company is headquartered in California, US.	Completed/Signed	Syntro Corp. granted Protein Polymer Technologies, Inc. a license to use Syntro's animal health biotech technology for Protein Polymer's own developments.	No		United States
	Merck & Co Inc Cigna Corp	Merck & Co Inc CIGNA Healthplans Inc			NJ CT	United States United States	Retail & Wholesale Services	5122	Merck & Co Inc, located in Whitehouse Station, New Jersey, manufactures and wholesales pharmaceutical products. It offers vaccines and medicines for the treatment of high blood pressure, elevated cholesterol levels, osteoporosis, asthma, benign prostatic hyperplasia, arthritis, migraine, glaucoma, emesis, infectious diseases (antibacterial, antifungal, and antiviral agents), and vaccines to preve…	Completed/Signed	Merck & Co (MC) and Cigna Health Plans Inc (CH), a unit of Cigna Corp, formed a strategic alliance to wholesale MC's pharmaceutical products to CH's health maintenance organizations for discounted prices in the United States. The agreement enabled MC's sales force to reach more customers at lower costs.	No		United States
	ChromatoChem Inc Merck KGaA	ChromatoChem Inc Merck KGaA			MT FF	United States Germany	Research & Development Services	2836	Manufacture and develop technology for removal of toxic metals from water Merck KGaA, located in Darmstadt, Germany, manufactures and wholesales pharmaceuticals, specialty chemicals, and cosmetic pigments. The company operates under four divisions: Merck Serono (biopharmaceuticals), Consumer Health (over-the-counter pharmaceuticals), Performance Materials (high-tech chemicals) and Merck Millipore…	Completed/Signed	E Merck (Germany) signed a research agreement to develop ChromatoChem's HiPAC affinity chromatography columns for removal of toxic metals in contaminated water.	No		United States Germany
	Imco Resources Ltd Merck KGaA	Imco Resources Ltd Merck KGaA			FF FF	Canada Germany	Licensing Services Research & Development Services Marketing Services	2836	Asbestos mining Merck KGaA, located in Darmstadt, Germany, manufactures and wholesales pharmaceuticals, specialty chemicals, and cosmetic pigments. The company operates under four divisions: Merck Serono (biopharmaceuticals), Consumer Health (over-the-counter pharmaceuticals), Performance Materials (high-tech chemicals) and Merck Millipore (products for pharmaceutical research and biotechnology).…	Completed/Signed	ImClone Systems and E. Merck signed an agreement for the development of anti-idiotypic antibodies and recombinant antigens for melanoma therapy. ImClone granted E. Merck sole marketing rights in Europe, Australia and New Zealand in exchange for license fees, research support and royalties on sales of melanoma products. Matuschka Group acted as an advisor to ImClone.	No	ImClone was to receive royalties on the sale of melanoma products.	Australia New Zealand
	Merck KGaA Environmental Diagnostics Inc	Merck KGaA Environmental Diagnostics Inc			FF NC	Germany United States	Marketing Services	2835	Merck KGaA, located in Darmstadt, Germany, manufactures and wholesales pharmaceuticals, specialty chemicals, and cosmetic pigments. The company operates under four divisions: Merck Serono (biopharmaceuticals), Consumer Health (over-the-counter pharmaceuticals), Performance Materials (high-tech chemicals) and Merck Millipore (products for pharmaceutical research and biotechnology). It also serves …	Completed/Signed	Environmental Diagnostics has chosen E. Merck Nederland to be a distributor of EDI's EZ-Screen drug abuse detection test.	No		Germany
	Syntro Corp Hoechst AG	Syntro Corp Hoechst-Roessel Agri-Vet Co			CA NJ	United States United States	Marketing Services	8742	Manufacture vaccines Manufacture agricultural chemicals and veterinarian pharmaceutical preparations	Completed/Signed	Syntro Corp and Hoechst-Roussel Agri-Vet Co formed a strategic alliance to provide marketing services of genetically engineered poultry vaccines and herpes virus vector medicines in the United States.	No		United States
	Merck KGaA Abbott Laboratories	Merck KGaA Abbott Laboratories			FF IL	Germany United States	Research & Development Services	8731	Merck KGaA, located in Darmstadt, Germany, manufactures and wholesales pharmaceuticals, specialty chemicals, and cosmetic pigments. The company operates under four divisions: Merck Serono (biopharmaceuticals), Consumer Health (over-the-counter pharmaceuticals), Performance Materials (high-tech chemicals) and Merck Millipore (products for pharmaceutical research and biotechnology). It also serves …	Completed/Signed	Abbott Laboratories Inc and E Merck formed a strategic alliance to provide research and development services of clinical chemistry test reagents and instrument systems globally.	No		Supranational
	Merck KGaA Nikken Chemicals Co Ltd	Merck KGaA Nikken Chemicals Co Ltd			FF FF	Germany Japan	Licensing Services	2836	Merck KGaA, located in Darmstadt, Germany, manufactures and wholesales pharmaceuticals, specialty chemicals, and cosmetic pigments. The company operates under four divisions: Merck Serono (biopharmaceuticals), Consumer Health (over-the-counter pharmaceuticals), Performance Materials (high-tech chemicals) and Merck Millipore (products for pharmaceutical research and biotechnology). It also serves …	Completed/Signed	E Merck licensed Nikken Chemical to use technology for the production of a treatment for bone infection.	No		Japan
	Theramex Roberts Pharmaceutical Corp	Theramex Roberts Pharmaceutical Corp			FF NJ	Monaco United States	Licensing Services Research & Development Services Marketing Services Supply Services Funding Services	6794	Manufacture pharmaceuticals; specialize in gynaecological drugs Manufacture post-discovery drugs in selected therapeutic categories; provide pharmeceutical research services	Completed/Signed	Roberts Pharmaceuticals Corp. has granted Theramex Laboratories an exclusive license to market Roberts' Somogard in France for use in prostate cancer and endometriosis treatments. Under the agreement, Roberts will supply Somagard to Theramex, and in return Theramex will assist in funding Somagard's continued development. Theramex also received the right to develop Somagard in France for endometri…	No		Supranational
	3M Merck & Co Inc	3M Merck & Co Inc			MN NJ	United States United States	Marketing Services Exclusive Licensing Services Licensing Services	5122	Manufacture coated paper, copying paper, adhesive tapes, abrasives, roofing granules, photographic film and magnetic recording tapes, dental products Merck & Co Inc, located in Whitehouse Station, New Jersey, manufactures and wholesales pharmaceutical products. It offers vaccines and medicines for the treatment of high blood pressure, elevated cholesterol levels, osteoporosis, asthma, benign pros…	Completed/Signed	Minnesota Mining and Manufacturing (3M) and Merck and Co., Inc. signed an agreement giving Merck the exclusive rights to market 3M's Sectrol and Duratrol brands of microencapsulated flea and tick products. The agreement calls for MSD AGVET, the animal health care division of Merck, to market the products in the United States beginning in 1992. 3M will continue to market the products through the e…	No		United States
	Theramex Roberts Pharmaceutical Corp	Theramex Roberts Pharmaceutical Corp			FF NJ	Monaco United States	Licensing Services Research & Development Services	6794	Manufacture pharmaceuticals; specialize in gynaecological drugs Manufacture post-discovery drugs in selected therapeutic categories; provide pharmeceutical research services	Completed/Signed	Theramex Laboratories and Roberts Pharmaceuticals signed an exclusive licensing agreement granting Theramex marketing rights in France to Robert's Somagard, a new product under developement for the treatment of prostate cancer, endometriosis, and precocious puberty. Under the terms of the agreement, Theramex would provide funding for the continued development of Somagard dosage forms and clinical…	No	Under the terms of the agreement, Theramex would provide funding for the continued development of Somagard dosage forms and clinical trials.	Supranational
	Vical Inc Merck & Co Inc	Vical Inc Merck & Co Inc			CA NJ	United States United States	Licensing Services Research & Development Services	6794	Vical Inc, located in San Diego, California, provides research and development services of biopharmaceutical products based on our patented DNA delivery technologies for the prevention and treatment of serious or life-threatening diseases. The company was founded in 1987. Merck & Co Inc, located in Whitehouse Station, New Jersey, manufactures and wholesales pharmaceutical products. It offers vacc…	Completed/Signed	Vical and Merck & Co. signed a licensing agreement allowing the two companies to collaborate on a program employing Vical's gene therapeutics for development of human infectious vaccines.	No		United States
	Merck & Co Inc Connaught Biosciences Inc	Merck Vaccine Division (Merck) Connaught Laboratories Ltd			NJ FF	United States Canada	Research & Development Services Marketing Services	8732	Manufacture vaccines Manufacture biological and pharmaceutical products	Completed/Signed	Merck and Connaught Laboratories, a unit of Institut Merieux, signed an agreement to jointly develop and co-promote combination pediatric vaccines. These are vaccines that combine a number of antigens to protect children, with a single dosage against diseases such as Haemophilus influenza type b, hepatitis B, diptheria, tetanus, pertussis and poliomyelitis. Combined vaccines had been coveted by t…	No		United States Canada
	Merck KGaA Medical Research Council	Merck KGaA Medical Research Council			FF FF	Germany United Kingdom	Research & Development Services	8731	Merck KGaA, located in Darmstadt, Germany, manufactures and wholesales pharmaceuticals, specialty chemicals, and cosmetic pigments. The company operates under four divisions: Merck Serono (biopharmaceuticals), Consumer Health (over-the-counter pharmaceuticals), Performance Materials (high-tech chemicals) and Merck Millipore (products for pharmaceutical research and biotechnology). It also serves …	Completed/Signed	E. Merck and Medical Research Council signed an agreement to establish a research laboratory in the UK. Initial projects were to concentrate on antibodies with therapeutic potential in cancer. Costs for 1991 and 1992 were projected at $4 million.	No	Projected costs for the research laboratory are $4 million for 1991 and 1992.	United Kingdom
	Millipore Corp Advanced Technology Materials	Millipore Corp Advanced Technology Materials		100	MA CT	United States United States	Marketing Services Manufacturing Services	3569	Millipore Corp, based in Billerica, Massachusetts, manufactures and wholesales medical and analytical laboratory equipment used in the analysis, identification and purification of liquids. The company's specializations include pharmaceuticals, biotechnology medicines and other therapeutic products. The company's services are available to clients in 47 nations. The company was founded in 1954. Man…	Completed/Signed	Advanced Technology terminated its Novapure joint venture it had formed with Millipore, by acquiring Millipore's 30% stake in the venture. Originally, Millipore and Advanced Technology Materials formed a joint venture to manufacture and wholesale high-technology peripherals for gas systems used by the international semiconductor industry. The venture's product line was to be built around Advanced…	Yes		Supranational
	Japan Pharmaceutical Dvlp Merck KGaA	Japan Pharmaceutical Dvlp Merck KGaA			FF FF	Japan Germany	Manufacturing Services Marketing Services	2836	Manufacture pharmaceuticals; produce health foods Merck KGaA, located in Darmstadt, Germany, manufactures and wholesales pharmaceuticals, specialty chemicals, and cosmetic pigments. The company operates under four divisions: Merck Serono (biopharmaceuticals), Consumer Health (over-the-counter pharmaceuticals), Performance Materials (high-tech chemicals) and Merck Millipore (products for pharmaceu…	Completed/Signed	Japan Pharmaceutical Development has granted E. Merck exclusive marketing and manufacturing rights in Africa and Western Europe to a human monoclonal antibody, a potential anti-cancer agent.	No		Supranational
	Merck & Co Inc ICI PLC	Merck & Co Inc Astra Pharmaceuticals USA			NJ MA	United States United States	Licensing Services Marketing Services	6794	Merck & Co Inc, located in Whitehouse Station, New Jersey, manufactures and wholesales pharmaceutical products. It offers vaccines and medicines for the treatment of high blood pressure, elevated cholesterol levels, osteoporosis, asthma, benign prostatic hyperplasia, arthritis, migraine, glaucoma, emesis, infectious diseases (antibacterial, antifungal, and antiviral agents), and vaccines to preve…	Completed/Signed	Astra Pharmaceuticals granted Merck the exclusive rights to sell its Plendil (felodipine) in the United States. Plendil was a calcium channel blocker used for treatment of hypertension that allowed for 24-hour control with one daily dose. In August 1991, the Food and Drug Administration approved the sale of Plendil in the United States.	No		United States
	Millipore Corp ImmunoSystems Inc	Millipore Corp ImmunoSystems Inc		50.00 50.00	MA ME	United States United States		5049	Millipore Corp, based in Billerica, Massachusetts, manufactures and wholesales medical and analytical laboratory equipment used in the analysis, identification and purification of liquids. The company's specializations include pharmaceuticals, biotechnology medicines and other therapeutic products. The company's services are available to clients in 47 nations. The company was founded in 1954. Man…	Completed/Signed	To wholesale pesticide detection kits manufactured by Australia's Commonwealth Scientific and Industrial Research Organization. The kits were to allow for the rapid detection of pesticide residues in agricultural produce, water and soil. They were expected to be cheaper than existing laboratory methods and usable in the field.	Yes		United States
	Merck KGaA Stanley J Sarnoff Endowment	Merck KGaA Survival Tech(Stanley)			FF MD	Germany United States	Research & Development Services	8731	Merck KGaA, located in Darmstadt, Germany, manufactures and wholesales pharmaceuticals, specialty chemicals, and cosmetic pigments. The company operates under four divisions: Merck Serono (biopharmaceuticals), Consumer Health (over-the-counter pharmaceuticals), Performance Materials (high-tech chemicals) and Merck Millipore (products for pharmaceutical research and biotechnology). It also serves …	Completed/Signed	Survival Technology and E Merck agreed to jointly research and develop new pharmaceuticals for the treatment of allergies and asthma. The initial research stages were completed by September 1991.	No		Supranational
	Syntro Corp Hoechst AG	Syntro Corp Hoechst Veterinaer(Hoechst AG)			CA FF	United States Germany	Licensing Services	6794	Manufacture vaccines Manufacture and wholesale pharmaceuticals	Completed/Signed	Syntro granted Hoechst Veterinar a license to its IBR/Marker cattle vaccine for infectious bovine rhinotracheitis, a respiratory and reproductive cattle disease. Under the agreement, Hoechst Veterinar was to pay Syntro license fees, as well as manufacturing and sales royalties, once IBR/Marker received European regulatory approval. Syntro retained the right to market IBR/Marker in the United Stat…	No	Hoechst Veterinar was to pay Syntro a licensing fee, as well as sales and manufacturing royalties once it received European regulatory approval for the vaccine.	Supranational
	Merck & Co Inc INBIO	Merck & Co Inc INBIO			NJ FF	United States Costa Rica	Manufacturing Services Research & Development Services	5122	Merck & Co Inc, located in Whitehouse Station, New Jersey, manufactures and wholesales pharmaceutical products. It offers vaccines and medicines for the treatment of high blood pressure, elevated cholesterol levels, osteoporosis, asthma, benign prostatic hyperplasia, arthritis, migraine, glaucoma, emesis, infectious diseases (antibacterial, antifungal, and antiviral agents), and vaccines to preve…	Completed/Signed	E Merck & Co signed an agreement with the Instituto National de Biodiversidad (INBio) of Costa Rica to manufacture and develop new pharmaceutical products using resources occuring naturally in the Costa Rican rain forests. Under the agreement, Merck was to provide INBio with $1 million in research funding and start-up expenses over the next two years, along with equipment and training. In return,…	No	Merck agreed to pay $1 million over the next two years for research funding and start-up expenses. Merck also said that it would contribute a portion of the profits on any products resulting from the joint effort to Costa Rican conservation efforts, and would also pay INBio royalties on net sales.	Supranational
	MedImmune Inc Merck & Co Inc	MedImmune Inc Merck & Co Inc			MD NJ	United States United States	Licensing Services Research & Development Services Funding Services	2836	Manufacture vaccines which include Synagis (palivizumab), Ethyol (amifostine), FluMist (Influenza Virus Vaccine Live, Intranasal), and CytoGam (cytomegalovirus immune globulin intravenous (human)) and with additional products in clinical testing; provide research and development services to discover, develop, manufacture and market products that treat or prevent infectious disease, cancer and inf…	Completed/Signed	MedImmune Inc. and Merck & Co. completed their agreement to form a program to develop monoclonal antibodies, which are versions of naturally occuring immune molecules, for the prevention of infection by the AIDS virus. The partners were expected to tailor monoclonal antibodies to target a portion of the human immunodeficiency virus (HIV type 1). The agreement called for Merck to pay MedImmune abo…	No	Under the agreement, Merck was to pay MedImmune an estimated US$13 million over the next three years to fund development.	United States
	Merck & Co Inc Kissei Pharmaceutical Co Ltd	Merck & Co Inc Kissei Pharmaceutical Co Ltd			NJ FF	United States Japan	Marketing Services	5122	Merck & Co Inc, located in Whitehouse Station, New Jersey, manufactures and wholesales pharmaceutical products. It offers vaccines and medicines for the treatment of high blood pressure, elevated cholesterol levels, osteoporosis, asthma, benign prostatic hyperplasia, arthritis, migraine, glaucoma, emesis, infectious diseases (antibacterial, antifungal, and antiviral agents), and vaccines to preve…	Completed/Signed	Merck & Co. granted Kissei Pharmaceutical exclusive manufacturing rights and a license to market Flexeril, a muscle relaxant, to Japan. Kissei planned to begin clinical testing in the next year. Sales of the drug in the United States were expected to run about $76.3 million.	No	Sales of the drug in the U.S. were expected to run about $76.3 million each year.	Japan
	Merck & Co Inc Qual-Med Inc	Merck & Co Inc Foundation Health Corp			NJ CA	United States United States	Retail & Wholesale Services	5122	Merck & Co Inc, located in Whitehouse Station, New Jersey, manufactures and wholesales pharmaceutical products. It offers vaccines and medicines for the treatment of high blood pressure, elevated cholesterol levels, osteoporosis, asthma, benign prostatic hyperplasia, arthritis, migraine, glaucoma, emesis, infectious diseases (antibacterial, antifungal, and antiviral agents), and vaccines to preve…	Completed/Signed	Merck & Co. and Foundation Health Corp. signed a sales agreement in which Merck was to provide its pharmaceutical products to Foundation Health's health maintenance organizations for discounted prices. The agreement enabled Merck's sales force to reach more customers at lower costs.	No		United States
	Isis Pharmaceuticals Inc Millipore Corp	Isis Pharmaceuticals Inc Millipore Corp			CA MA	United States United States	Research & Development Services	8731	Biotechnology company Millipore Corp, based in Billerica, Massachusetts, manufactures and wholesales medical and analytical laboratory equipment used in the analysis, identification and purification of liquids. The company's specializations include pharmaceuticals, biotechnology medicines and other therapeutic products. The company's services are available to clients in 47 nations. The company wa…	Completed/Signed	Isis Pharmaceuticals, Inc. and Millipore Corp. signed an agreement to co-develop antisense drugs based on Millipore's chemicals and synthesis and separation systems.	No		United States
	Cephalon Inc SIBIA Neurosciences Inc	Cephalon Inc SIBIA Neurosciences Inc			PA CA	United States United States	Research & Development Services Manufacturing Services Supply Services	2836	Manufacture therapeutic products for the treatment of neurodegenerative diseases focussing on products that prevent neuronal death in stroke and neurodegenerative disorders such as Lou Gehrig's disease, Alzheimers and head and spinal injuries Manufacture novel small molecule therapeutics for the treatment of neurodegenerative, neuropsychiatric and neurological disorders	Completed/Signed	Cephalon Inc. and SIBIA Inc. (Salk Institute Biotechnology/Industrial Associates) signed an agreement for the manufacture and development of Myotrophin, a human recombinant insulin-like growth factor, for use in the treatment of amytropic lateral sclerosis (ALS), also known as Lou Gherig's disease. Under the agreement, SIBIA was to supply Cephalon with a sufficient amount of Myotrophin to complet…	No		United States
	Merck KGaA IVAX Corp	Merck KGaA Diamedix Corp(IVAX Corp)			FF FL	Germany United States	Marketing Services	5122	Merck KGaA, located in Darmstadt, Germany, manufactures and wholesales pharmaceuticals, specialty chemicals, and cosmetic pigments. The company operates under four divisions: Merck Serono (biopharmaceuticals), Consumer Health (over-the-counter pharmaceuticals), Performance Materials (high-tech chemicals) and Merck Millipore (products for pharmaceutical research and biotechnology). It also serves …	Completed/Signed	Diamedix Corp and E Merck have signed a non-exclusive worldwide distribution agreement under which E Merck has the rights to distribute Diamedix' enzyme immunoassay test kits and fully automated instrumentation for reading and calculating the results of such diagnostic tests. E Merck will have the right to sell the products under E Merck's own private label.	No
	Merck & Co Inc Glaxo Holdings PLC	Merck & Co Inc SmithKline Beecham PLC			NJ FF	United States United Kingdom	Marketing Services	5122	Merck & Co Inc, located in Whitehouse Station, New Jersey, manufactures and wholesales pharmaceutical products. It offers vaccines and medicines for the treatment of high blood pressure, elevated cholesterol levels, osteoporosis, asthma, benign prostatic hyperplasia, arthritis, migraine, glaucoma, emesis, infectious diseases (antibacterial, antifungal, and antiviral agents), and vaccines to preve…	Completed/Signed	Merck & Co., Inc. and SmithKline Beecham, Plc. signed an agreement to co-promote and market Merck's Zocor (as Simvastatin), which is a once-daily prescription medication for the treatment of elevated total and LDL-cholesterol levels. Merck disclosed that Zocor is a member of a drug class called HMG-CoA reductase inhibitors, which are agents that lower blood cholesterol levels by inhibiting the ac…	No
Bayer	Henkel AG & Co KGaA Bayer AG	Henkel AG & Co KGaA Erdolchemie(Bayer AG,BP Chem)			FF FF	Germany Germany	Manufacturing Services	2869	Henkel AG & Co KGaA, located in Dusseldorf, Germany, manufactures and wholesales consumer and industrial chemical products. The company manufactures cosmetics, toiletries, laundry and home care products which operates through four divisions. Henkel Technologies produces industrial adhesives, contact adhesives and sealants. Cosmetics/toiletries division produces hair cosmetics, toiletries, oral an…	Completed/Signed	Henkel and Erdolchemie entered into an agreement to construct a 40,000 m.t. per year production plant for ethoxylates at Erdolchemie's Cologne-Worrington complex. Erdolchemie, a joint venture between Bayer and BP Chemicals, was to supply ethylene oxide feedstock, while Henkel was to provide technology for the ethoxylation of fatty alcohols.	No		Germany
	Toda Kogyo Corp Bayer AG	Toda Kogyo Corp Bayer AG			FF FF	Japan Germany	Research & Development Services	3572	Toda Kogyo Corp is a manufacturer of magnetic iron oxide and ferrite materials, headquartered in Hiroshima, Japan. The company offers materials used for applications, including pigments, magnets, magnetic tape, electric-wave absorption materials, toners and catalysts. The company's operations are carried out through the Ferric oxide, Battery-related materials and ferrite materials divisions. Baye…	Completed/Signed	Toda Kogyo and Bayer jointly developed magnetic tape materials for videotape recorders. Toda Kogyo was Japan's largest supplier of magnetic iron oxide materials, but sought greater access to foreign markets.	No		Japan Germany
	Hoechst AG Bayer AG American Medical Association	Hoechst AG Bayer AG American Medical Association		33.30 33.30 33.30	FF FF IL	Germany Germany United States	Manufacturing Services	2834	Manufacture textile and technical fibers, acetate cigarette filter tow, specialty and bulk chemicals, prescription drugs, veterinary pharmaceuticals, animal feed additives, crop protection products, engineered plastics, polyester film, resins, high density polyethylene, presensitized offset printing plates, dyes and pigments, paints, coatings and sealants; wholesale chemicals, allied products, dr…	Completed/Signed	Hoechst AG, Bayer AG, the American Medical Consortium, and several universities in Europe and the United States have formed a joint venture to manufacture pharmaceuticals and medicines in the Soviet Union. The new company, Intermedfarm, will focus on sedatives, anti-tumor drugs, and cardiovascular drugs, and will also manufacture diagnostic and medical equipment.	Yes		Soviet Union
	Cie ORIS Industrie(CEA/France) Byelorussia Academy of Science	CIS Bio International Byelorussia Academy of Science		50.00 50.00	FF FF	France Soviet Union	Marketing Services Manufacturing Services	2835	Manufacture reagents and develop radiopharmaceuticals for in-vivo diagnosis and treatment of diseases, as well as in in-vitro diagnostics and radioactive markers Manufacture in-vitro radioimmunological kits	Completed/Signed	CIS Bio International signed an agreement with the Byelorussian Academy of Sciences for the creation of a joint venture company, Beloris, for the packaging and sale in the Soviet Union of bulk reagents made by CIS Bio International and the sale of in-vitro radioimmunological kits made at the Academy's experimental production plant.	Yes		Soviet Union
	Bayer AG VEBA AG	Bayer AG Huels AG		50.00 50.00	FF FF	Germany Germany		2899	Bayer AG, located in Leverkusen, Germany, manufactures and wholesales chemicals and pharmaceuticals with operations in four divisions namely Healthcare, which comprises the pharmaceuticals, biological products, consumer care, animal health and diagnostics divisions; Crop Science, which develops and sells fungicides, herbicides, insecticides and seed treatment products; and Material Science which …	Completed/Signed	In June 1991, Bayer AG announced plans to terminate a joint venture formed with Huels AG and created to manufacture specialty chemicals and that the venture's assets would be divided equally among the two concerns.	Yes		Germany
	Bayer AG Imco Resources Ltd	Miles Inc Imco Resources Ltd			IN FF	United States Canada	Research & Development Services	2836	Manufacture pharmaceutical preparations products, vitamins, organic and inorganic industrial and medicinal chemicals, in vitro and in vivo diagnostic substances, dental equipment and supplies, pigments and enamels, equipment for photography and photoprocessing Asbestos mining	Completed/Signed	Miles Inc, a subsidiary of Bayer AG, and ImClone Systems Inc have entered into a one-year research agreement in which Miles was to develop ImClone's Interleukin-1 (IL-1) inhibitor product. Miles was expected to negotiate marketing rights for the product upon the expiration of the one-year agreement. Financial details were not disclosed.	No		United States
	Tanabe Seiyaku Co Ltd Schering AG	Tanabe Seiyaku Co Ltd Nihon Schering KK(Schering AG)			FF FF	Japan Japan	Research & Development Services Marketing Services	2834	Manufacture prescription pharmaceuticals intended for final consumption, including biotech products and antibiotics; provide pharmacuetical research services Manufacture and wholesale pharmaceuticals	Completed/Signed	Tanabe Seiyaku and Nihon Schering agreed to jointly develop and market Tanabe's anti-hypertension drug, Imidapril, and Schering's non-ionic x-ray contrast medium, Iopromide. It was believed that the agreement would expand Tanabe's market share in in vivo imaging agents and would allow Nihon Schering to improve its central nervous and circulatory system drugs.	No		Japan
	Houghten Pharmaceuticals Inc Bayer AG	Houghten Pharmaceuticals Inc Miles Inc			CA IN	United States United States	Research & Development Services	8731	Provide pharmaceutical research services. Manufacture pharmaceutical preparations products, vitamins, organic and inorganic industrial and medicinal chemicals, in vitro and in vivo diagnostic substances, dental equipment and supplies, pigments and enamels, equipment for photography and photoprocessing	Completed/Signed	Houghten Pharmaceuticals Inc and Miles Inc, a unit of Bayer AG, have agreed to jointly research and discover new drugs in a program that applied specific Miles' assays and Houghten's short peptide screening technology to Houghten's peptide libraries. Financial terms were not disclosed.	No		United States
	Bristol-Myers Squibb Co Schering AG	Bristol-Myers Squibb Co Berlex Laboratories Inc			NY NJ	United States United States	Licensing Services Marketing Services	5122	Bristol-Myers Squibb Co, located in New York, New York, manufactures pharmaceuticals and medical products. It also offers health products, surgical supplies and equipment in vitro and in vitro diagnostic substances, toiletries, beauty aids, household products, and dry, condensed and evaporated dairy products. The company's blockbuster cardiovascular line-up includes heart disease drug Plavix, as …	Completed/Signed	Bristol-Myers Squibb Co and Berlex Labs Inc, a subsidiary of Schering AG, have entered into a cross-licensing agreement in which Bristol-Myers licensed US marketing rights to its anti-arrhythmic drug, Betapace, to Berlex in exchange for worldwide rights to Schering's patented technology for use in Bristol's ProHance magnetic resonance imaging (MRI) contrast agent.	No		United States
Eli Lilly	IDEC Pharmaceuticals Corp Eli Lilly & Co	IDEC Pharmaceuticals Corp Hybritech Inc(Eli Lilly & Co)			CA CA	United States United States	Research & Development Services	8731	Biotechnology company, focusing on the development of treatments for cancer and autoimmune and inflammatory diseases Manufacture immunodiagnostic devices and test kits	Completed/Signed	IDEC Pharmaceuticals Corp and Hybritech Inc formed a strategic alliance to provide research and development services in the United States. The alliance developed Pan B antibodies conjugated with the radioisotope yttrium, used for the treatment of advanced non-Hodgkin's B-cell Lymphomas. If yttrium is combined with the antibodies, it is hoped that a safer, more effective therapy than is possible w…	No		United States
	Neurogenetic Corp Eli Lilly & Co	Neurogenetic Corp Eli Lilly & Co			NJ IN	United States United States	Research & Development Services	8731	Manufacture pharmaceuticals and diagnostic products Eli Lilly & Co, located in Indianapolis, Indiana, manufactures and wholesales pharmaceuticals and diagnostic and animal health products. The company specializes in research and development, production and marketing of products for the treatment of diabetes worldwide. It has research and development facilities in nine countries and conducts clini…	Completed/Signed	Eli Lilly and Co. and Neurogenetic Corp. signed a four-year agreement to develop neurological pharmaceuticals based on Neurogenetic's cloned human serotonin neurotransmitter technology. Lilly will acquire an undisclosed equity stake in Neurogenetic and will fund the company's development of neurogenetic drugs. Neurogenetic has granted an exclusive worldwide license to Lilly for its technology. In…	No	Lilly was to make royalty payments to Neurogenetic on the sales of Lilly products covered by the agreement.	Supranational
	Eli Lilly & Co Millennium Pharmaceuticals Inc	Eli Lilly & Co COR Therapeutics Inc			IN CA	United States United States	Licensing Services Research & Development Services Funding Services	6794	Eli Lilly & Co, located in Indianapolis, Indiana, manufactures and wholesales pharmaceuticals and diagnostic and animal health products. The company specializes in research and development, production and marketing of products for the treatment of diabetes worldwide. It has research and development facilities in nine countries and conducts clinical trials. The company manufactures and distributes…	Completed/Signed	COR Therapeutics Inc. and Eli Lilly and Company signed a four-year joint research agreement for the development of new platelet aggregate inhibitor compounds for use in the treatment of cardiovascular disorders. Under the agreement, COR granted Eli Lilly a worldwide license to any products resulting from the project, for which COR will receive milestone payments and royalties from any sales. Eli …	No	Eli Lilly acquired a 6% stake in COR for $4 million. In addition, Eli Lilly agreed to fund COR's research and development for $1.4 million per year. COR was to receive milestone payments and royalties from sales.	United States
	Eli Lilly & Co Medco Research Inc	Eli Lilly & Co Medco Research Inc			IN NC	United States United States	Licensing Services Supply Services		Eli Lilly & Co, located in Indianapolis, Indiana, manufactures and wholesales pharmaceuticals and diagnostic and animal health products. The company specializes in research and development, production and marketing of products for the treatment of diabetes worldwide. It has research and development facilities in nine countries and conducts clinical trials. The company manufactures and distributes…	Completed/Signed	As a resolution to all outstanding litigation between Eli Lilly and Medtronic, the two firms agreed to cross-license all patents covering cardiac stimulation devices. The two firms also agreed that Medtronic would supply Eli Lilly's parent company, Cardiac Pacemakers, with certain bradycardia pacing products for a defined period of time. The supply agreement was to be a one-way arrangement; Cardi…	No
	Athena Neurosciences Inc Eli Lilly & Co	Athena Neurosciences Inc Hybritech Inc(Eli Lilly & Co)			CA CA	United States United States	Research & Development Services Marketing Services	8731	Manufacture pharmaceuticals Manufacture immunodiagnostic devices and test kits	Completed/Signed	Athena Neurosciences Inc formed a research collaboration with Hybritech Inc aimed at developing a test for Alzheimer's disease by focusing on the detection of deposits of amyloid plaques in the brain. Under the agreement, Athena was to receive financial support in exchange for giving Hybritech worldwide marketing rights to any products that emerged from the collaboration, excluding Japan and some…	No	Athena was to receive financial support in exchange for marketing rights.	United States
	ICOS Corp Glaxo Holdings PLC	ICOS Corp Glaxo Holdings PLC		50.00 50.00	WA FF	United States United Kingdom	Research & Development Services	2836	Biotechnology company Manufacture pharmaceuticals, industrial organic chemicals, inorganic chemicals, food preparations and laboratory equipment	Completed/Signed	ICOS and Glaxo Holdings agreed to establish a joint venture for ithe development of therapeutic agents to modulate the activity of tissue-specific isozymes of phosphodiesterase. The program was to focus initially on inflammatory and cardiovascular diseases, but could also include respiratory and gastrointestinal disorders. ICOS stated that it would transfer to Glaxo the recent products of its clo…	Yes		United Kingdom
	Takara Shuzo Co Ltd Eli Lilly & Co	Takara Shuzo Co Ltd Eli Lilly & Co			FF IN	Japan United States	Licensing Services Research & Development Services Marketing Services	5122	Produce alcoholic beverages and food;manufacture specialty biomedical products Eli Lilly & Co, located in Indianapolis, Indiana, manufactures and wholesales pharmaceuticals and diagnostic and animal health products. The company specializes in research and development, production and marketing of products for the treatment of diabetes worldwide. It has research and development facilities in nine c…	Completed/Signed	Takara Shuzo granted Eli Lilly rights to develop and sell R106-based products outside of Japan. Uses of R106 included the treatment of intestinal problems and infections caused by mycosis or bacterial fungus. Takara signed a similar agreement with Nippon Kayaku.	No
	Eli Lilly & Co Hungarian Pharmaceutical	Eli Lilly & Co Hungarian Pharmaceutical			IN FF	United States Hungary	Licensing Services Marketing Services Manufacturing Services	2834	Eli Lilly & Co, located in Indianapolis, Indiana, manufactures and wholesales pharmaceuticals and diagnostic and animal health products. The company specializes in research and development, production and marketing of products for the treatment of diabetes worldwide. It has research and development facilities in nine countries and conducts clinical trials. The company manufactures and distributes…	Completed/Signed	The Hungarian Pharmaceutical Research Institute granted Eli Lilly the exclusive license to its new cardiovascular drug. The patented drug was most effective as of Sept 1991 in combatting cardiovascular disorders. Eli Lilly was to pay a licensing fee for the drug in addition to a maintentance fee for annual clinical tests. The Institute would be entitled to a certain slice of the returns from the …	No	Eli Lilly would pay the Hungarian Pharmaceutical Research Institute 100 mil forint ($1.3 mil US based on a Sept 1991 exchange rate of 75 forint/$1) to cover the costs of its 15-year research.	United States
	ICOS Corp Cold Spring Harbor Laboratory	ICOS Corp Cold Spring Harbor Laboratory			WA NY	United States United States	Research & Development Services Funding Services	8731	Biotechnology company Provide research and development services in programs such as cancer, neuroscience, plant genetics, genomics and bioinformatics and a a broad educational mission	Completed/Signed	ICOS Corp. entered into a joint biological research agreement with Cold Spring Harbor Laboratory in the areas of cell growth, activation and metabolism. The agreement stipulated the length of the agreement would be five years, funded by ICOS, and managed jointly with Cold Spring Harbor Laboratory. The agreement also stipulated that ICOS would have the option to license inventions arising from the…	No	ICOS agreed to fund the research program, and was to pay Cold Spring Harbor royalties on any jointly developed product that it licensed.
	Allelix Biopharmaceuticals Inc Eli Lilly & Co	Allelix Biopharmaceuticals Inc Eli Lilly Canada Inc			FF FF	Canada Canada	Research & Development Services	2836	Manufacture pharmaceuticals and biopharmaceuticals Eli Lilly Canada Inc, located in Toronto, Ontario, manufactures prescription, over the counter and biological products for human and animal use, home health care products, medical supplies, monitoring and other equipment.	Completed/Signed	Allelix Biopharmaceuticals and Eli Lilly Canada expanded and extended their 1987 agreement until 1994. Under the new agreement, the two companies planned to collaborate on the research and development of drugs for treatment of central nervous system disorders. Eli Lilly also acquired additional Allelix common stock for $6 million. The size of the stake was undisclosed.	No	Eli Lilly acquired an stake in Allelix of undisclosed size for $6 million.	United States
	Eli Lilly & Co Sphinx Pharmaceuticals Corp	Eli Lilly & Co Sphinx Pharmaceuticals Corp			IN NC	United States United States	Research & Development Services	8731	Eli Lilly & Co, located in Indianapolis, Indiana, manufactures and wholesales pharmaceuticals and diagnostic and animal health products. The company specializes in research and development, production and marketing of products for the treatment of diabetes worldwide. It has research and development facilities in nine countries and conducts clinical trials. The company manufactures and distributes…	Completed/Signed	Eli Lilly and Sphinx Pharmaceuticals signed a four-year agreement for the development of a new class of therapeutics based on Sphinx's "lipid second messagers," which were by-products of cell membrane lipids which regulate intracellular processes. Under the agreement, Eli Lilly was to provide research funding for the development of inhibitors of protein kinase C, which were enzymes that regulate …	No		United States
BSM	Lidak Pharmaceuticals Inc GenPharm International Inc	Lidak Pharmaceuticals Inc GenPharm International Inc			CA CA	United States United States	Research & Development Services	0751	Manufacture pharmaceuticals products; provide biotechnology research services Biological research; Manufacture pharmaceuticals	Completed/Signed	Lidak Pharmaceuticals and GenPharm International Inc. signed an agreement to jointly develop animal models for use in the study of human immune system diseases including AIDS. GenPharm will provide the transgenic immunodeficient (TIM) mice that will be tested with Lidak's proprietary hu-PBL transplantation technology. The companies anticipate the TIM mice will make the Lidak technology easier to …	No
	Advanced Magnetics Inc Bristol-Myers Squibb Co	Advanced Magnetics Inc Bristol-Myers Squibb Co			MA NY	United States United States	Licensing Services	3845	Develop, manufacture and market organ specific contrast agents to improve the diagnostic capabilities of soft tissue magnetic resonance imaging scans Bristol-Myers Squibb Co, located in New York, New York, manufactures pharmaceuticals and medical products. It also offers health products, surgical supplies and equipment in vitro and in vitro diagnostic substances, toiletries, beauty aids, househol…	Completed/Signed	Advanced Magnetics, Inc. granted the Squibb Diagnostics division of Bristol-Myers Squibb Co. a license for Advanced Magnetics' contrast agents for magnetic resonance imaging(MRI). The agreement called for Bristol-Myers Squibb to pay a US$4 mil licensing fee to Advanced Magnetics for the technology.	No	Bristol-Myers Squibb to pay a US$4 mil licensing fee to Advanced Magnetics for the technology.	United States
	GenPharm International Inc DNX Corp	GenPharm International Inc DNX Inc			CA NJ	United States United States	Licensing Services Research & Development Services Marketing Services	0751	Biological research; Manufacture pharmaceuticals Provide research and development services of therapeutic products and biological testing services based on transgenic animals	Completed/Signed	DNX Inc. and GenPharm International Inc. have agreed to a license exchange covering two technologies related to the development of transgenic animals. DNX will grant a license to its DNA microinjection technology to GenPharm. In exchange, GenPharm will grant DNX a license to its homologous recombination technology. The agreement requires both companies to pay annual license fees in addition to ro…	No	The agreement required both companies to pay annual license fees in addition to royalties on commercial sales of products related to the technology at hand.	United States
	Bristol-Myers Squibb Co Sankyo Co Ltd	Bristol-Myers Squibb Co Sankyo Co Ltd			NY FF	United States Japan	Marketing Services	5122	Bristol-Myers Squibb Co, located in New York, New York, manufactures pharmaceuticals and medical products. It also offers health products, surgical supplies and equipment in vitro and in vitro diagnostic substances, toiletries, beauty aids, household products, and dry, condensed and evaporated dairy products. The company's blockbuster cardiovascular line-up includes heart disease drug Plavix, as …	Completed/Signed	Bristol-Myers Squibb Co and Sankyo Co Ltd have agreed to jointly market Squibb's ACE-inhibitor captopril, Capoten, in Japan. The drug was used to treat hypertension and congestive heart failure, and was marketed exclusively by Sankyo in Japan since 1983. Financial terms were not disclosed.	No		Japan
	Netherlands Cancer Institute GenPharm International Inc	Netherlands Cancer Institute GenPharm International Inc			FF CA	Netherlands United States	Licensing Services Marketing Services Exclusive Licensing Services	0751	Provide cancer research services Biological research; Manufacture pharmaceuticals	Completed/Signed	The Netherlands Cancer Institute has exclusively licensed its pim-1 mice to GenPharm International Inc. Pim-1 mice are a unique strain of transgenic mice. They carry a gene associated with human tumors that allows them to be used as an in vivo detection system for mammalian carcinogens. The pim-1 mice have increased responsiveness to carcinogens which reduces testing and animal care costs. In add…	No		United States
	National Cancer Institute Bristol-Myers Squibb Co	National Cancer Institute Bristol-Myers Squibb Co			MD NY	United States United States	Research & Development Services	8731	National Cancer Institute, located in Bethesda, Maryland, provides medical research services. Bristol-Myers Squibb Co, located in New York, New York, manufactures pharmaceuticals and medical products. It also offers health products, surgical supplies and equipment in vitro and in vitro diagnostic substances, toiletries, beauty aids, household products, and dry, condensed and evaporated dairy prod…	Completed/Signed	Bristol-Myers Squibb Co and National Cancer Institute formed a strategic alliance to provide research and development services of anti-tumor therapeutical and pharmaceutical drugs in the United States.	No		United States
	Novo Nordisk Fonden Squibb Corp	Novo Nordisk A/S Squibb Corp		100	FF NJ	Denmark United States	Marketing Services Manufacturing Services	2834	Novo Nordisk As, located in Bagsvaerd, manufactures and wholesales pharmaceutical and health care products. The company operates through two segments namely: Diabetes Care and Biopharmaceuticals. Diabetes care segment includes discovery, development and manufacturing of products within the areas of insulin and delivery systems and oral antidiabetic products (OAD). Biopharmaceuticals segment inclu…	Terminated	Novo Nordisk and Squibb terminated their joint venure. Novo Nordisk and Squibb established a joint venture in Princeton, New Jersey to produce and wholesale insulin for the U.S. market. The venture was aborted when Novo Nordisk acquired Squibb's 50% holding in the venture. Subsequently, the venture became Novo Nordisk Pharmaceuticals Inc (NNPI), a subsidiary of Novo Nordisk.	Yes		United States
	Advanced Magnetics Inc Bristol-Myers Squibb Co	Advanced Magnetics Inc Squibb Diagnostics			MA NJ	United States United States	Research & Development Services Marketing Services	5122	Develop, manufacture and market organ specific contrast agents to improve the diagnostic capabilities of soft tissue magnetic resonance imaging scans Manufacture diagnostic substances	Completed/Signed	Squibb Diagnostics has received exclusive marketing rights from Advanced Magnetics for its AMI-HS imaging agent for liver tumors and AMI-227 imaging agent for lymph nodes, bone marrow, and blood perfusion. Squibb paid Advanced Magnetics $4 million at the closing of the deal, and was also required to provide milestone payments of an additional $6 million, and significant royalties on sales. Squibb…	No	Squibb paid $4 mil for marketing rights at the closing of the deal and was to provide milestone payments of an additional $6 mil and significant royalties on sales.	United States
	Gerber Products Co Bristol-Myers Squibb Co	Gerber Products Co Bristol-Myers Squibb Co		50.00 50.00	MI NY	United States United States		2032	Manufacture baby foods, infant and children's apparel, bed and bath accessories, toys and baby products; provide life and health insurance; own and operate preschool centers Bristol-Myers Squibb Co, located in New York, New York, manufactures pharmaceuticals and medical products. It also offers health products, surgical supplies and equipment in vitro and in vitro diagnostic substances, toiletrie…	Completed/Signed	To produce and wholesale baby foods and formulas.	Yes		United States
	MIT GenPharm International Inc	MIT GenPharm International Inc			MA CA	United States United States	Licensing Services	0751	Massachusetts Institute of Technology{MIT}, located in Cambridge, Massachusetts, own and operate college and university. Biological research; Manufacture pharmaceuticals	Completed/Signed	GenPharm International granted the Massachusetts Institute of Technology a license to its genetically engineered mice for use in MIT's research and testing of human gene therapies and animal disease models. The mice, which lack certain proteins, allow transplants of other cells without rejection.	No
	Roberts Pharmaceutical Corp Bristol-Myers Squibb Co	Roberts Pharmaceutical Corp Bristol-Myers Squibb Co			NJ NY	United States United States	Licensing Services Research & Development Services	6794	Manufacture post-discovery drugs in selected therapeutic categories; provide pharmeceutical research services Bristol-Myers Squibb Co, located in New York, New York, manufactures pharmaceuticals and medical products. It also offers health products, surgical supplies and equipment in vitro and in vitro diagnostic substances, toiletries, beauty aids, household products, and dry, condensed and evapo…	Completed/Signed	Bristol-Myers Squibb Company has signed an agreement in principle with Roberts Pharmaceuticals Corporation granting Roberts the exclusive worldwide rights to Bristol-Myers' anagrelide, a drug for the treatment of primary and secondary thrombocytosis associated with certain leukemias and cancers of blood-related organs. Under the agreement, Roberts will be responsible for funding the completion of…	No	Bristol-Myers was to receive a payment from Roberts and royalties based on sales.	United States
	Quatro Biosystems Soc Nationale Elf Aquitaine Bristol-Myers Squibb Co	Quatro Biosystems Sanofi Chimie(Sanofi/Societe) Genetic Systems Corp			FF FF WA	United Kingdom France United States	Research & Development Services Manufacturing Services Supply Services	8731	Manufacture medical robots Manufacture inorganic chemicals Develop diagnostic and therapeutic products	Completed/Signed	Quatro Biosystems and Sanofi entered into a technology transfer and buyback agreement under which Quatro received the right to acquire several of Genetic Systems', a Sanofi subsidiary, proprietary devices, which inclued robotic sample processing technology. Quatro intended to improve its Quatro 300 automated blood chemistry analyzer. Genetic Systems, which used its instrumentation on an OEM basis…	No		Supranational
	US Forest Service Bristol-Myers Squibb Co	US Forest Service Bristol-Myers Squibb Co			DC NY	United States United States	Research & Development Services	8731	Government agency Bristol-Myers Squibb Co, located in New York, New York, manufactures pharmaceuticals and medical products. It also offers health products, surgical supplies and equipment in vitro and in vitro diagnostic substances, toiletries, beauty aids, household products, and dry, condensed and evaporated dairy products. The company's blockbuster cardiovascular line-up includes heart diseas…	Completed/Signed	The U.S. Forest Service signed a five-year agreement with Bristol-Myers Squibb to hasten the production of taxol, an experimental cancer drug derived from the bark of the Pacific yew tree. Under the terms of the agreement, Bristol-Myers would be able to extract bark from Pacific yews on Forest Service land.	No		United States
	Cellular Products Inc Bristol-Myers Squibb Co	Cellular Products Inc Genetic Systems Corp			NY WA	United States United States	Marketing Services	8742	Manufacture and wholesale human cellular products, and diagnostic and blood screening test kits; provide research and development services Develop diagnostic and therapeutic products	Completed/Signed	Cellular Products Inc and Genetic Systems Corp formed a strategic alliance to provide HTLV-I Elisa Test Kit marketing services in the United States and Canada.	No		Supranational
	GenPharm International Inc Dutch Ministry-Research Inst	GenPharm International Inc Dutch Ministry-Research Inst			CA FF	United States Netherlands	Research & Development Services		Biological research; Manufacture pharmaceuticals Provide biological research services	Completed/Signed	GenPharm International and the Research Institute for Animal Production of the Dutch Ministry of Agriculture jointly developed a transgenic calf that produces a human milk protein in its own milk. GenPharm had been responsible for the in-vitro processs for generating the transgenic embryo.	No
	GenPharm International Inc Harvard University	GenPharm International Inc Harvard University			CA MA	United States United States	Licensing Services		Biological research; Manufacture pharmaceuticals Harvard University, located in Cambridge, Massachusetts, owns and operates a university. The company was founded in 1638.	Completed/Signed	Harvard University granted GenPharm International a license to its transgenic mice deficient in major histocompatibility complex (MHC). GenPharm planned to use the mice in its reseach work for understanding immune disorders and cancers. These mice lacked the cell surface proteins coded by MHC Type II. In March 1991, GenPharm licensed mice deficient in MHC Type I proteins from the Massachusetts In…	No
	Bristol-Myers Squibb Co Hauser Chemical Research Inc	Bristol-Myers Squibb Co Hauser Chemical Research Inc			NY CO	United States United States	Manufacturing Services	2821	Bristol-Myers Squibb Co, located in New York, New York, manufactures pharmaceuticals and medical products. It also offers health products, surgical supplies and equipment in vitro and in vitro diagnostic substances, toiletries, beauty aids, household products, and dry, condensed and evaporated dairy products. The company's blockbuster cardiovascular line-up includes heart disease drug Plavix, as …	Completed/Signed	Bristol-Myers-Squibb signed a three-year agreement with Hauser Chemical Research to manufacture and process bark into Taxus resin and bulk Taxol, the latter of which was found to be a promising cancer compound. The agreement would renew itself automatically for another two-year period unless cancelled by Bristol-Myers on a 12-months notice to Hauser.	No		United States
	Takara Shuzo Co Ltd Bristol-Myers Squibb Co	Takara Shuzo Co Ltd Bristol-Myers Squibb Co			FF NY	Japan United States	Marketing Services	5122	Produce alcoholic beverages and food;manufacture specialty biomedical products Bristol-Myers Squibb Co, located in New York, New York, manufactures pharmaceuticals and medical products. It also offers health products, surgical supplies and equipment in vitro and in vitro diagnostic substances, toiletries, beauty aids, household products, and dry, condensed and evaporated dairy products. The compa…	Completed/Signed	Takara Shuzo Co Ltd has granted US marketing rights to Bristol-Myers Squibb Co for its NKT-01 immunosuppressant, which is said to cause fewer toxicity complications after organ transplants.	No
	Amylin Pharmaceuticals Inc Glaxo Holdings PLC	Amylin Pharmaceuticals Inc Glaxo Inc(Glaxo Holdings PLC)			CA NC	United States United States	Research & Development Services	2836	Amylin Pharmaceuticals Inc, headquartered in San Diego, California, is a biopharmaceutical company that manufactures and develops pharmaceuticals and therapeutics based upon peptide analogs, primarily in regulation of glucose metabolism. It also provides research and development services looking to develop novel therapeutics based on amylin, a newly discovered hormone that play a role in glucose …	Completed/Signed	Amylin Pharmaceuticals Inc and Glaxo Inc, a unit of Glaxo Holdings PLC, have entered into an agreement to jointly research and develop diabetes and obesity therapies using Amylin's research on the pancreatic hormone amylin. Under the agreement, Amylin retained the diagnostic rights to the technology. Financial terms were not disclosed.	No		United States
	Bristol-Myers Squibb Co Python Catalytic Inc	Bristol-Myers Squibb Co Python Catalytic Inc			NY UN	United States United States	Research & Development Services	8731	Bristol-Myers Squibb Co, located in New York, New York, manufactures pharmaceuticals and medical products. It also offers health products, surgical supplies and equipment in vitro and in vitro diagnostic substances, toiletries, beauty aids, household products, and dry, condensed and evaporated dairy products. The company's blockbuster cardiovascular line-up includes heart disease drug Plavix, as …	Completed/Signed	Python Catalytic, Inc. and Bristol-Myers Squibb Co formed a strategic alliance to provide research and development service for a production process for taxol, a cancer-fighting agent, in the United States. The agreement was to allow Python Catalytic to use Bristol-Myers' proprietary plant cell technologies to develop the production process.	No		United States
	Bristol-Myers Squibb Co Phyton Catalytic Inc	Bristol-Myers Squibb Co Phyton Catalytic Inc			NY NY	United States United States	Research & Development Services	8731	Bristol-Myers Squibb Co, located in New York, New York, manufactures pharmaceuticals and medical products. It also offers health products, surgical supplies and equipment in vitro and in vitro diagnostic substances, toiletries, beauty aids, household products, and dry, condensed and evaporated dairy products. The company's blockbuster cardiovascular line-up includes heart disease drug Plavix, as …	Completed/Signed	Bristol-Myers Squibb and Phyton Catalytic signed an agreement for the joint development of a plant cell tissue culture process for the production of Taxol, which was an anti-cancer agent found from a natural source in limited quantity. Phyton was the USDA's exlusive licensee for the Taxol production process, and was also the first commercial company to produce Taxol using a plant cell tissue cult…	No		United States
	Bristol-Myers Squibb Co Schering AG	Bristol-Myers Squibb Co Berlex Laboratories Inc			NY NJ	United States United States	Licensing Services Marketing Services	5122	Bristol-Myers Squibb Co, located in New York, New York, manufactures pharmaceuticals and medical products. It also offers health products, surgical supplies and equipment in vitro and in vitro diagnostic substances, toiletries, beauty aids, household products, and dry, condensed and evaporated dairy products. The company's blockbuster cardiovascular line-up includes heart disease drug Plavix, as …	Completed/Signed	Bristol-Myers Squibb Co and Berlex Labs Inc, a subsidiary of Schering AG, have entered into a cross-licensing agreement in which Bristol-Myers licensed US marketing rights to its anti-arrhythmic drug, Betapace, to Berlex in exchange for worldwide rights to Schering's patented technology for use in Bristol's ProHance magnetic resonance imaging (MRI) contrast agent.	No		United States

## Sheet: alliances_1992
ALL:1992
company	subsidiary	name alliance partner company	Deal value (mil$)	stake equity	target state	country	industry (high-tech) code	Target SIC code	company description	remarks	deal info
J&J	Janssen pharmaceuticals belgium	KV pharmaceuticals			MO	US		2834	KV Pharmaceutical Co, located in St. Louis, Missouri, manufactures and wholesales advanced drug delivery technologies which enhance the effectiveness of new therapeutic agents, existing pharmaceutical products and nutritional supplements.		K.V. Pharmaceutical, Inc. and Janssen Pharmaceutica, N.V., a unit of Johnson & Johnson, signed an agreement to jointly develop and market Hismanal-D, an allergy treatment. Hismanal-D combined KV's once-daily decongestant pseudeophedrine, and Janssen's once-daily antihistamine. In May 1992, Hismanal-D received marketing approval in Korea and Denmark
	Ortho Pharmaceutical Corp	Virginia Ctr Innovative Tech			VA	US		8731	Provide biological research services		The Virginia Center for Innovative Technology granted Ortho Pharmaceutical a license to its contraceptive vaccine for women. Under the agreement, Ortho gained the exclusive, worldwide rights for the vaccine. The Center was to continue the vaccine's development, as it was currently in clinical trials. The vaccine worked by stimulating a women's immune system to produce antibodies to a sperm protei…
	RW Johnson Pharmaceuticals	Affymax NV				NL		2834	Provide pharmaceutical research and development services		Affymax, N.V. and R.W. Johnson Pharmaceutical Research Institute, a unit of Johnson & Johnson Co., signed an agreement to jointly develop a therapeutic product. Affymax was to use its synthesis and screening technologies to search for new compounds which stimulate a specific receptor. RW Johnson was to provide funding to Affymax for research and development purposes in addition to clinical develo…
	Centocor Inc	Imperial Cancer Research Tech				UK		8731	Provide cancer research services		Centocor Inc signed a licensing agreement with Imperial Cancer Research Technology for the development of Imperial Cancer Research's UCHL1, a monoclonal antibody. Under the terms of the agreement, the antibody would be used in developing drugs for the prevention or treatment of autoimmune and immune-related disorders. The antibody was also designated CD45RO, meaning it would recognize a component…
	Scios Inc	Marion Merrell Dow Inc			MO	US		2834	Manufacture pharmaceuticals and surgical appliances and supplies		Scios, Inc. and Marion Merrell Dow, Inc.(MMD) signed an agreement to jointly develop new therapies for Alzheimer's disease. Since Alzheimer's patients have been found to develop deposits of amyloid plaque in their brains, which is believed to kill the memory-carrying nerve cells known as neurons. Therefore, the collaboration focused to produce pharmaceuticals that prevented the formation of one c…
	ALZA Corp	Glycomed Inc			CA	US		8731	Provide biological research services		ALZA and Glycomed agreed to jointly develop an implantable, controlled-release drug delivery product for patients who undergo open heart and other surgical procedures. Under the agreement, Glycomed will receive a worldwide marketing license to the system which uses ALZA's PeriAd System and Glycomed's periadventitial delivery technology. ALZA will receive royalties from the sales of the products r…
	IOLAB Corp(Johnson & Johnson)	Lifecore Biomedical Inc			MN	US		3843	Lifecore Biomedical Inc, located in Chaska, Minnesota, manufactures dental implant systems, tissue regeneration products, and medical grade hyaluronan.		Lifecore Biomedical Inc signed an agreement with IOLAB Corp, a unit of Johnson & Johnson, to develop a high molecular weight sodium hyaluronate based on Lifecore's microbial fermentation process for use in IOLAB's AMVISC Brand opthalmic viscoelastic surgical products.
	IOLAB Corp(Johnson & Johnson)	Lifecore Biomedical Inc			MN	US		3843	Lifecore Biomedical Inc, located in Chaska, Minnesota, manufactures dental implant systems, tissue regeneration products, and medical grade hyaluronan.	*	LifeCore Biomedical, Inc. and Iolab Corp., a unit of Johnson & Johnson, signed an agreement to jointly develop a high molecular weight sodium hyaluronate, which was to be used in Iolab's viscoelastic eye surgery products. The hyaluronate was based on hyaluronic acid(HA) fractions, which was extracted from its natural source, rooster combs. However, LifeCore had grown HA through its proprietary mi…
	Ethicon Inc	Lifecore Biomedical Inc			MN	US		3843	Lifecore Biomedical Inc, located in Chaska, Minnesota, manufactures dental implant systems, tissue regeneration products, and medical grade hyaluronan.		LifeCore Biomedical and Ethicon entered into an agreement in which Ethicon was to develop a product for the reduction of surgical adhesions based on LifeCore's sodium hyaluronate technology.
Pfizer	Wyeth-Ayerst Laboratories	Liposome Co Inc			NJ	US		2834	Manufacture pharmaceutical products using cell lipid technology including TLC LA-19		Wyeth-Ayerst Laboratories and the Liposome Co. signed an agreement to develop and market a human liposomal influenza vaccine, or 'flu-shot'. The vaccine was to incorporate a liposomal adjuvant invented and patented by Liposome, to boost the protective effect of the vaccine. The partners had conducted experiments that found animals injected with an influenza vaccine containing the liposome adjuvan…
	Pfizer Inc	Neurogen Corp	4.1		CT	US		2834	Neurogen Corp, located in Branford, Connecticut, manufactures and develops small-molecule drugs focused on the treatment of psychiatric and neurological disorders, including insomnia, Parkinson's disease, restless legs syndrome (RLS), anxiety and pain. The company was founded in 1987.		Neurogen Corp. and Pfizer, Inc. signed a five-year agreement to jointly develop central nervous system drugs based on Neurogen's technology. Initial research will focus on developing more efficacious anxiolytic agents that have fewer and less serious side effects than agents now in clinical use. Pfizer was to provide funding for Neurogen research and development purposes. Pfizer was to also purch…
	Wyeth-Ayerst Laboratories	Genetics Institute Inc			MA	US		2834	Provide pharmaceutical research and devlopment services; manufacture therapeutic products using recombinant DNA for treatment of anemia,hemophilia, and low white blood cell counts		Genetics Institute, Inc. and Wyeth-Ayerst Laboratories, a unit of American Home Products Corp., signed an agreement to jointly develop and market small molecule-based drugs. Genetics Institute was to contribute its molecular biology and assay development technology, while Wyeth-Ayerst provided synthetic chemistry and pharmaceutical development technology. The partners initially focused in the are…
	Warner-Lambert Co	Xenova Ltd				UK		8731	Provide biological research services		Warner-Lambert Co. and Xenova, Ltd. signed a five-year agreement to jointly develop small-molecule drugs, based on Xenova's small-molecule technology. Xenova has discovered biologically active small-molecules by screening the chemicals produced naturally by micro-organisms, particulary fungi. Warner-Lambert was to provide funding to Xenova for research and development purposes.
	Warner-Lambert Co	Rhone-Poulenc Rorer Inc			PA	US		2834	Manufacture pharmaceuticals for heart disease, strokes, hypertensive diseases and other cardiovascular diseases, infectious diseases and AIDS, depression, Alzheimer's disease and memory disorders, anxiety and panic, sleep disorders, Schizophrenia, migraines, and other central nervous system disorders and pain, beta-2 stimulants and inhaled steroids for asthma, intranasal steroids and antihistamin…		Warner-Lambert Co signed an agreement with Rhone-Poulenc Rorer to jointly develop and market sparfloxacin, an advanced quinolone antibiotic, which Warner-Lambert licensed from Dainippon Pharmaceuticals of Japan in 1989. As of April 1992, sparfloxacin was to enter Phase III clinical trials in the US as a treatment for community acquired infections. Under the agreement, Rhone-Poulenc Rorer would co…
	Wyeth-Ayerst Laboratories	Kaken Pharmaceutical Co Ltd				Japen		2834	Kaken Pharmaceutical Co Ltd, headquartered in Tokyo, Japan, manufactures and wholesales medical, animal health products and agricultural chemicals. The Group manufactures metabolic agents, nervous system agents, antibiotics, digestive agents, farm and industrial chemicals. It is also engaged in the leasing of real estate. The operations are carried out through the following divisions: Pharmaceuti…		Kaken Pharmaceutical Co., Ltd. granted Wyeth-Ayerst Laboratories, a unit of American Home Products Corp., an exclusive license to develop and market Kaken's growth hormone releasing peptides (GHRP) in the U.S. and Canada, and an option to an exclusive license in Latin America, Europe, Africa, Australia, and New Zealand, with Kaken having retained the right to develop and market the products after…
	Wyeth-Ayerst Laboratories	RP Scherer Corp			MI	US		2834	Manufacture drug delivery systems, including soft gelatin capsules for pharmaceutical, vitamin, cosmetic and recreational products, optical products, infusion bottle closers, medicinal and dental products; wholesale ophthalmic and professional goods		Wyeth-Ayerst granted R.P. Scherer a worldwide license to develop and supply other pharmaceutical firms with fast-dissolving formulations of the ZYDIS Fast Dissolving Dosage Form Technology invented by Wyeth and jointly developed with R.P Scherer. In addition, Wyeth Italy was to market in Europe a formulation of lorazepam, a benzodiazepine anxiolytic, in combination with the ZYDIS technology. The …
	Pfizer Inc	TheraTech Inc			UT	US		2834	Manufacture drug delivery products which administer drugs through the skin, by oral delivery to the gastrointestinal tract, through tissues in the oral cavity and by other means		TheraTech Inc and Pfizer Inc have agreed to jointly develop and manufacture pharmaceutical products. TheraTech was expected to develop transdermal products for several agents in Pfizer's research and development pipeline. Pfizer received worldwide marketing for controlled release drug delivery technologies as a result of the collaboration, including transdermal patches and oral polymeric delivery…
	Wyeth-Ayerst Laboratories	Pharmaceutical Proteins Ltd				UK		2834	Manufacture pharmaceuticals		Wyeth-Ayerst, a unit of American Home Products Corp., and Pharmaceutical Proteins, Ltd., entered into a long-term collaborative effort to develop special use products for metabolic, geriatric, and pediatric applications from transgenic animals in order to produce human proteins from transgenic animals. Pharmaceutical Proteins specialized in the development of novel proteins in the milk of transge…
	Wyeth-Ayerst Laboratories	Suntory Ltd				Japan		2082	Suntory Ltd, headquartered in Osaka, Japan, produces and wholesales beer, malt and blended liquors. The company's products include wine, whisky, beer, ready to drink, low-alcohol, non-alcoholic beverages. The company is also a holding firm with interest in health foods, fast food outlets and flower business, restaurants chains, pharmaceuticals, manufacturing and distributing of soft drinks, and p…		Wyeth-Ayerst received an exclusive license to develop and commercialize Suntory's oral and injectable penem antibiotics in North, Central, and South America. The antibiotics were intended for the treatment of mild to severe bacterial infections.
	Wyeth-Ayerst Laboratories	Panlabs International Inc			WA	US		8731	Provide biotechnological research lab services		Wyeth-Ayerst and Panlabs signed an multi-year agreement to collaborate on the detection of novel pharmacologically active substances for the treatment of osteoporosis, hypertension, neurological diseases, and inflammation. Under the agreement, Wyeth-Ayerst was to own all inventions related to the composition of active metabolites, direct products, or derivative products and patents. The companies…
	Wyeth-Ayerst Laboratories	Genta Inc			MA	US		2834	Manufacture pharmaceutical used in the treatment of a broad range of diseases		Genta, Inc. and Wyeth-Ayerst Laboratories, a unit of American Home Products, signed an agreement to jointly develop an antisense therapeutics for certain human infectious disease, based on Genta's technology. In an antisense treatment, compounds bind to RNA ('antisense') molecules containing the generic code that prompts cells to produce disease-causing proteins, which may help stop disease befor…
	Pfizer Inc	Procter & Gamble Co			OH	US		2841	Procter & Gamble Co, located in Cincinnati, Ohio, manufactures, wholesales, distributes, markets cosmetics, deodorants, feminine care, fragrances, hair care and colorants and skin products, oral care, pharmaceuticals, household cleaning items like fabric, dish, air and commercial cares products, diapers, baby wipes, bath tissue, kitchen towels and facial tissue, blased and razors, batteries and s…	terminated	Pfizer, Inc. and Procter & Gamble Co. (P&G) terminated a letter of intent to jointly develop P&G's risendronate prescription drug, for the treatment of osteoporosis. Risendronate is based on P&G's etidronate prescription drug, also used for in the treatment of osteoporosis. As of September 1992, risendronate had been in the early clinical development stage. Pfizer was expected to enter into an ag…
	Pfizer Inc	Alamar Biociences Inc			IL	US		2835			Alamar Biosciences and Pfizer, Inc. signed an agreement to jointly develop an in vitro antifungal susceptibility kit, based on Alamar's Redox Colorimetric Reduction Method. The kit was able to determine which medication and what dosage will be effective in treating yeast infections. Pfizer provided development funding to Alamar, and in return received exclusive rights to the product that results …
	American Cyanamid Co (Wyeth)	Interneuron Pharmaceuticals			MA	US		2834	Manufacture biopharmaceuticals in the development and commercialization of a diversified portfolio of product candidates, including multiple compounds in late-stage clinical development		Interneuron Pharmaceuticals, Inc.(IP) and American Cyanamid Co. signed an agreement to jointly develop and market dexfenfluramine, a prescription anti-obesity drug that may reduce carbohydrate craving, in the U.S. Through the agreement, IP granted Amercian Cyanamid a license to its dexfenfluramine patent technology. In return, IP received $2 million in cash from American Cyanamid, and sold about …
	Pfizer Inc	ALZA Corp (J&J)			CA	US		2834	Manufacture and develop pharmaceutical products that incorporate drugs into advanced dosage forms designed to provide controlled, predetermined rates of drug release for extended time periods		ALZA and Pfizer agreed to collaborate on the development of a controlled-release version of the diabetes drug Glucotrol using ALZA's patented, proprietary gastrointestinal/oral osmotic system. Patients with non-insulin dependent hypoglycemia taking the drug would only need to one dose daily for around-the-clock effectiveness. Pfizer was to market the finished product under a royalty-bearing licen…
	American Cyanamid Co (Wyeth)	Regeneron Pharmaceuticals Inc			NY	US		2834	Regeneron Pharmaceuticals Inc, located in Tarrytown, New York, is a biopharmaceutical company, focused on the development of products for the treatment of obesity, rheumatoid arthritis and other inflammatory conditions, as well as cancer and related disorders, allergies, asthma and other serious medical conditions. Some of its therapeutic areas are in oncology, ophthalmology, cardiovascular disea…		Regeneron Pharmaceuticals, Inc. and American Cyanamid Co. signed an agreement to jointly develop and market a new type of neurotrophic factors, heparin binding neurotrophic factor(HPNF) and midkine. The neurotrophic factors are naturally occuring proteins that promote the survival and activity of nerve cells. Any products resulting as a result of the collaboration will ne co-promted by the partic…
Roche	Genentech Inc	Cambridge Biotech Corp			MA	US		2836	Biotechnology company		Cambridge Biotech Corp. granted Genentech Inc. a license to utilize its gp 120 proteins in the development of an AIDS vaccine and therapeutics. Under the agreement, Genentech was to use the protein in two existing development programs, one application being an AIDS vaccine, the other being use in as an immunotherapeutic for asymptomatic HIV-positive individuals. Cambridge Biotech received a one-t…	Genentech agreed to pay Cambridge Biotech a one-time license fee and a royalty on future sales.
	Syntex Corp	Hoechst AG				Germany		2824	Manufacture textile and technical fibers, acetate cigarette filter tow, specialty and bulk chemicals, prescription drugs, veterinary pharmaceuticals, animal feed additives, crop protection products, engineered plastics, polyester film, resins, high density polyethylene, presensitized offset printing plates, dyes and pigments, paints, coatings and sealants; wholesale chemicals, allied products, dr…		Syntex Corp. and Hoechst, A.G. signed an agreement to jointly develop and market Syntex's leflumonide anti-rheumatic, in Europe. Terms were not disclosed.
	Boehringer Mannheim GmbH	Rhone-Poulenc Rorer Incs			PA	US		2834	Manufacture pharmaceuticals for heart disease, strokes, hypertensive diseases and other cardiovascular diseases, infectious diseases and AIDS, depression, Alzheimer's disease and memory disorders, anxiety and panic, sleep disorders, Schizophrenia, migraines, and other central nervous system disorders and pain, beta-2 stimulants and inhaled steroids for asthma, intranasal steroids and antihistamin…		Rhone-Poulenc Rorer Inc. and Boehringer Manheim GmbH formed a strategic alliance to provide research and development services of cancer-related hypercalcemia and osteolysis therapeutic medicines globally.
	Genentech Inc	NeoRx Corp			WA	US		2834	Manufacture cancer diagnostic and treatment products; provide cancer research services		NeoRx Corp. and Genentech, Inc. signed an agreement to jointly develop antibody-guided radiotherapeutic agents, designed to target the HER2 oncoprotein expressed by breast and ovarian cancers. NeoRx was to contribute its proprietary rhenium radiotherapy technology, while Genentech contributed its humanized monoclonal antibodies.
	Hoffmann-La Roche Inc	Washington University,MO	8		MO	US		8221	Washington University is a university located in St. Louis, Missouri.		Hoffman La-Roche, Inc. and Washington University signed a five-year agreement to jointly develop pharmaceutical products that can reverse cell damage. The agreement is designed to find ways to protect the brain and spinal cord from injuries. Hoffman-LaRoche was to provide $8 million of funding to Washington University for research and development services.	Hoffman-LaRoche was to provide $8 million of funding to Washington University for research and devlopment services.
	Roche Holding AG	PharmaGenics Inc			NJ	US		8731	Provide biological research services		PharmaGenics Inc and Roche Holding AG have agreed to jointly develop anti-cancer oligonucleotides which modified tumor suppressor gene function. The research was begun by scientists at the Johns Hopkins University School of Medicine, and was still in the early stages of research and development. The agreement extended through early 1995. Under the terms of the agreement, PharmaGenics received exc…	PharmaGenics was slated to receive royalties.
	Hoffmann-La Roche Inc	Institut San Raffaele				Italy		8731	Provide biological research services		Hoffmann-LaRoche, Inc. and Institut San Raffaele signed an agreement to form Roche Milano Ricerche, a joint venture to provide research services in areas of molecular and cell immunology and autoimmune diseases.
	Hoffmann-La Roche Inc	Xenova Ltd				UK		8731	Manufacture chemical products		Xenova, Ltd. granted Hoffmann-La Roche S.A. an exclusive license to develop its CD4-active compounds for autoimmune disease, allergy and organ transportation purposes. The CD4-active compound inhibit the binding of CD4 cell surface receptors to MHC class II proteins. Xenova held the rights to other indications. Financial terms were not disclosed.
	Chugai Pharmaceutical Co Ltd	Rhone-Poulenc Rorer SA				France		2821	Manufacture pharmaceuticals for heart disease, strokes, hypertensive diseases and other cardiovascular diseases, infectious diseases and AIDS, depression, Alzheimer's disease and memory disorders, anxiety and panic, sleep disorders, Schizophrenia, migraines, and other central nervous system disorders and pain, beta-2 stimulants and inhaled steroids for asthma, intranasal steroids and antihistamin…		Rhone-Poulenc Rorer and Chugai Pharmaceutical entered into an agreement to develop and market Taxotere in Japan. Taxotere was extracted from the leaves of the European yew tree and had been undergoing tests in Europe as a potential treatment for cancerous solid tumors. A chemical with a similar application was Taxol, an extract from the bark of the Pacific yew; however, the extraction process des…
	Chugai Pharmaceutical Co Ltd	Rhone-Poulenc Rorer SA			PA	US		2834	Manufacture pharmaceuticals for heart disease, strokes, hypertensive diseases and other cardiovascular diseases, infectious diseases and AIDS, depression, Alzheimer's disease and memory disorders, anxiety and panic, sleep disorders, Schizophrenia, migraines, and other central nervous system disorders and pain, beta-2 stimulants and inhaled steroids for asthma, intranasal steroids and antihistamin…		Rhone-Poulenc Rorer Inc, a subsidiary of French state-owned Rhone-Poulenc SA, and Chugai Pharmaceutical Co Ltd have agreed to jointly develop and promote Rhone-Poulenc's anti-tumor drug, Taxotere, in Japan. Taxotere treated tumorous cancers, such as ovarian, breast, and lung cancer. Unlike taxol, which was extracted from the bark of the endangered Pacific Yew, Taxotere was extracted from yew leav…
	Chugai Pharmaceutical Co Ltd	Mitsubishi Kasei Corp				Japan		2869	Mitsubishi Kasei Corp, headquartered in Tokyo, Japan, is engaged in the manufacture of synthetic organic fibers, industrial chemicals, pharmaceuticals, petroleum and aluminum products, and electronic products.		Mitsubishi Kasei Corp and Chugai Pharmaceutical Co Ltd entered into a strategic alliance to develop Mitsubishi Kasei's MCI-536. MCI-536 was used as a therapeutic drug in the treatment of osteoporosis. Financial terms were not disclosed.
	Genentech Inc	De Puy Inc			IN	US		2834	Manufacture pharmaceuticals		Genentech and De Puy signed an agreement to jointly develop orthopedic devices with the use of transforming growth factor-B.
	Syva Co(Syntex Corp)	University of California at LA; University of Florida			CA, FL	US		8221	Provide medical research services Own and operate college and university		Syva Co., a unit of Syntex Corp., the University of California at LA Medical Center, and the University of Florida signed an agreement to jointly develop a diagnostic test for individuals at risk for insulin-dependent diabetes mellitus(IDDM).
	Chugai Pharmaceutical Co Ltd	Kobe Women's College of				Japan		8221	College; scientific research and development; testing services		Chugai Pharmaceutical Co and Kobe Women's college of Pharmacy developed a new drug that reportedly strengthened the brittle bones of osteoporotic patients. The drug consisted of short-chain carbon compounds bound to an activated vitamin D molecule.
	Genentech Inc	Univax Biologics Inc			MD	US		2836	Manufacture immuno-therapeutic agents for treating bacterial infectionss		Univax Biologics and Genentech agreed to jointly develop an antibody-based substance based on Genentech's gp120 vaccine. The companies intended to develop a hyperimmune immunoglobulin from human antibodies to neutralize HIV-1. Under the agreement, Genentech was to supply Univax with recombinant gp120 vaccine to be used in Univax's donor stimualation program to general hyperimmune immunoglobulin t…
	Genentech Inc	Bayer AG				Germany		2833	Bayer AG, located in Leverkusen, Germany, manufactures and wholesales chemicals and pharmaceuticals with operations in four divisions namely Healthcare, which comprises the pharmaceuticals, biological products, consumer care, animal health and diagnostics divisions; Crop Science, which develops and sells fungicides, herbicides, insecticides and seed treatment products; and Material Science which …		Genentech Inc, a unit of Roche Holding, and Bayer AG have entered into an agreement in which Bayer received an exclusive, worldwide license to Genentech's gene for factor VIII. The factor VIII gene was to be developed as a blood clotting factor for hemophilia treatment by Bayer and Viagene. Financial terms were not disclosed.
GSK	Glaxo Group Ltd	BioChem Pharma Inc				Canada		2834	Manufacture pharmaceuticals for prevention and treatment of human diseases		BioChem Pharma, Inc. granted Glaxo Group, Ltd. a license to develop BioChem Pharma's 3TC compound. The license provided Glaxo the right to develop, manufacture, and market the compound. 3TC, which had been hailed as an AIDS treatment, had been found in pre-clinical trials to be a potential treatment for hepatitis B. Under the terms of the agreement, BioChem would receive a royalty based on sales …
	Genelabs Technologies Inc	University of North Carolina			CA	US		8221	University		The University of North Carolina granted Genelabs Technologies, Inc. a license to develop and market GL331, a cancer compound. GL331 was designed for the treatment of cancer patients whose tumors have become resistant to chemotherapeutic drugs after therapy. Genelabs was to develop GL331 and market it worldwide. Genelabs was to also make milestone payments to the University and pay royalties on a…
	Burroughs Wellcome Co	Duke University	5		NC	US		8221	Own and operate college and university		Burroughs Wellcome Co. and Duke University signed a three-year agreement to jointly develop and research Burroughs Wellcome's Campath-1H monoclonal antibody-based product, which is used in the treatment of lymphomas, solid tumors and compartmentalized tumors, including those of the central nervous system. Burroughs Wellcome was to provide $5 million in funding to Duke University for research and …	Burroughs Wellcome was to provide $5 million in funding to Duke University for research and development purposes.
	SmithKline Beecham PLC	Affinity Biotech Inc	3 mill + 1.4 for equity		PA	US		2834	Manufacture pharmaceutical products;provide product development services for pharmaceutical companies		Smithkline Beecham (SKB) and Affinity Biotech entered into a research and licensing agreement for the development of a microemulsion system for SKB's therapeutic protein. Under the agreement, SKB held the license and had the right to negotiate licenses to Affinity's system for certain proteins. In addition, SKB agreed to provide $360,000 in research funding for the development of the microemulsio…	Smithkline Beecham agreed to provide $360,000 in research funding and also agreed to make up to $3 million in milestone payments of which a portion was to be credited towards royalties between 2% and 7% of sales. Smithkline took a 19.6% stake in Affinity Biotech for $1.4 million with the stipulation that its stake would be reduced after Affinity went public in March 1992.
	Genelabs Technologies Inc	Proteus International PLC				UK		2834	Provide computer aided molecular modeling and drug design services		Genelabs Technologies, Inc. and Proteus International, plc. signed an agreement to form Progene Partners, a joint venture to design and develop highly targeted DNA-binding drugs for a block specific genes, particularly cancer-causing oncogenes and viral infection genes, while minimizing toxicity. In the past, DNA-binding drugs had been used as antibiotics for chemotherapy, but their lack of seque…
	SmithKline Beecham PLC	British Bio-Technology Group				UK		8731	Provide pharmaceutical research and development services; manufacture pharmaceutical products; holding company		British Bio-technology Group, plc. and SmithKline Beecham, plc. signed an agreement to jointly develop and market matrix metalloproteinase inhibitors, which are pharmaceutical agents designed to prevent damage to matrix tissue from arthritis and certain cancers. The agreement stipulated that each company funded its own research and development programs. British Bio-tech was to develop anti-invasi…
	SmithKline Beecham PLC	US Bioscience Inc			PA	US		2834	Manufacture pharmaceuticals; provide research services		U.S. Bioscience, Inc. and SmithKline Beecham, plc. signed an agreement to jointly market and develop US Bioscience's Ethyol and WR-151327 agents, and PALA modulator, in Japan, South Korea and Taiwan. Ethyol and WR-151327 are agents designed to protect normal tissue form some of the side effects of chemotherapy and radiation therapy. PALA is a biochemical modulator designed to enhance the activity…
	Glaxo Group Ltd	Norton Healthcare(IVAX Corp)				UK		2834	Manufacture pharmaceutical products		Norton Healthcare, a subsidiary of IVAX Corp., and Glaxo agreed to the joint development of a breath activated device to be used in the treatment of asthma and pulmonary disorders. After the completion of the development program, Glaxo was to receive the rights to market the product in the United Kingdom with its own asthma products. Norton was to receive an initial fee and additional payments up…
	SmithKline Beecham PLC	Michigan Dept of Public Health			MI	US		9431	Provide public health administration services		The Michigan Department of Public Health and SmithKline Beecham signed a letter of intent to distribute and jointly develop pediatric vaccines against diptheria, tetanus, whole-cell pertussis, and rabies. Under the agreement, SmithKline was to co-develop the vaccines and distribute them in the United States.
	Glaxo Holdings PLC	Yamanouchi Pharmaceutical Co				Japan		2834	Manufacture prescription pharmaceuticals intended for final consumption, including biotech products and antibiotics		Glaxo Holdings, plc. and Yamanouchi Pharmaceutical Co., Ltd. signed an agreement to jointly develop Yamanouchi's YM175 bisphosphonate, for the treatment of osteoporosis. Glaxo was responsible for the development and registration of YM175 in markets outside Japan and southeast Asia. Upon approval, Glaxo was granted exclusive rights to market YM175 in those markets, subject to Yamanouchi's right to…
	Glaxo Holdings PLC	British Bio-Technology Group	2			UK		8731	Provide pharmaceutical research and development services; manufacture pharmaceutical products; holding company		Glaxo Holdings and British Bio-technology Group (BBT) entered into an agreement in which Glaxo was provide BBT with $2 million in funding initially to develop BB-882, BBT' anti-inflammatory drug. The companies agreed to jointly explore the drug's potential as an oral treatment for asthma, carry out Phase I clinical trials on healthy volunteers in the third quarter of 1992 and larger scale Phase I…	Glaxo agreed to fund BBT with $2 million for preclinical development work initially and add to that sum for Phase I clinical trials scheduled to begin in the third quarter.
	SmithKline Beecham Americas	Yale University			CT	US		8221	University		Yale University licensed SmithKline Beecham exclusive worldwide rights to the patents related to its technology related to Lyme disease. The license granted SmithKline the right to use Yale's technology and antigenic material to develop a vaccine for antigenic types of the bacteria involved in the pathogenesis of Lyme disease. Under the agreement, SmithKline was to pay Yale license fees and royal…
	SmithKline Beecham PLC	Marion Merrell Dow Inc			MO	US		2834	Manufacture pharmaceuticals and surgical appliances and supplies		SmithKline Beecham and Marion Merrell Dow signed an agreement to establish a joint venture that would develop and market over-the-counter pharmaceutical products. It would be called SmithKline Consumer Brands and could adopt the name SmithKline Beecham Marion if the products reached a designated level and could be restructured from its 90/10 ownership to an equally-owned partnership. Products sel…
	Glaxo Inc(Glaxo Holdings PLC)	Houghten Pharmaceuticals Inc			CA	US		8731	Provide pharmaceutical research services.		Glaxo and Houghten Pharmaceuticals signed a joint research and development agreement for Houghten's patented synthetic peptide libraries to be used for screening peptides for desired interactions with specified receptor molecules. Under the agreement, Glaxo was to make upfront and milestone payments to Houghten. Both companies were to receive royalties based on sales of products resulting from th…	Glaxo was to make initial and milestone payments to Houghten. Both companies were to receive royalties based on the sales of the products resulting from the collaboration.
	SmithKline Beecham PLC	Genelabs Technologies Inc	2 mill for stock and 2 mill loan	0.012	CA	US		2834	Genelabs Technologies Inc, headquartered in Redwood City, California, manufactures and develops pharmaceutical products focused in novel compounds for infectious diseases.		Genelabs Technologies, Inc. and SmithKline Beeacham, plc. signed a three-year agreement to jointly develop and commercialize a hepatitis E virus vaccine. Genelabs received license payments, research and development support, and royalties from SmithKline Beecham, who in return received exclusive rights to manufacture and market the vaccine in the U.S., Europe and Japan.	SmithKline Beecham financed the agreement through a 219,178 common share (or 1.2% equity stake) purchase in Genelabs valued at $2 million. SmithKline also provided Genelabs with a $2 million interest-free loan that SmithKline planned to convert into Genelabs' common stock within two years at the market price at the time.
	Glaxo Inc(Glaxo Holdings PLC)	Ligand Pharmaceuticals Inc		0.06	CA	US		2835	Ligand Pharmaceuticals Inc, located in San Diego, California, manufacture diagnostic tests for cancer. The company was founded in 1987		Glaxo, Inc. and Ligand Pharmaceuticals, Inc. signed a five-year agreement to jointly develop, produce and market therapeutics based on Ligand's hormone-activated intracellular receptor technology, for the treatment of atherosclerosis. The development focused on hormones and the familty of intracellular receptors, which play major roles in the regulation of lipid and cholesterol production and dis…	Glaxo financed the agreement through a 6% equity stake purchase in Ligand Pharmaceutical.
	Glaxo Holdings PLC	FH Faulding & Co Ltd				Australia		2834	Manufacture pharmaceutical preparations, medicinal chemicals, botanical products, soap and other detergents, perfumes, cosmetics and other toiletries; wholesale prescription and proprietary drugs, druggists' sundries and toiletries		Glaxo Holdings, plc. and F.H. Faulding & Co., Ltd. formed an alliance to jointly develop and commercialize therapeutics. Terms were not disclosed.
	SmithKline Beecham PLC	IDEC Pharmaceuticals Corp.	2.4 mill for stock								IDEC Pharmaceuticals Corp. and SmithKline Beecham, plc. signed an agreement to jointly develop and commercialize therapeutic products based on "primatized" anti-CD4 antibodies. The anti-CD4 antibodies are derived from human and monkey antibodies and have potential applications in the treatment of rheumatoid arthritis, lupus, psoriasis, inflammatory bowel disease and multiple sclerosis. However, t…	SmithKline through its SR One venture capital unit, partially financed the agreement with a $2.4 million equity stake purchase in IDEC by way of the open market. SmithKline also agreed to purchase IDEC warrants which cover future purchases of newly issued shares from IDEC. Half of the open market purchases were to be completed before April 15, 1993, with the second half following the allowance by…
	SmithKline Beecham PLC	Exogene			CA	US		2836	Manufacture genetically engineered vaccines; provide commercial physical research and development services		Exogene and SmithKline Beecham agreed to research Exogene's hemoglobin development. The technology was developed to improve SmithKline Beecham's medical products.
	Genelabs Technologies Inc	Paradigm Biosciences Inc	0.5 mill for stock		UT	US		2834	Manufacture pharmaceutical products; provide biological research services		Genelabs Technologies Inc (GT) and Paradigm Biosciences Inc (PB) signed an agreement to jointly develop and commercialize Paradigm's proprietary technolgy and lead compounds for use as aids, or adjuvants with certain vaccines targeted against various tropical and childhood diseases. Adjuvants, when administered concurrently with certain vaccines are designed to boost the recipiant's immune respon…	Genelabs purchased $500,000 worth of Paradigm's preferred stock. Paradigm was to receive royalty payments on all sales.
Novartis	Sandoz Pharma AG(Sandoz AG)	Gensia Pharmaceuticals Inc	22		CA	US		2834	Manufacture pharmaceuticals		Gensia Pharamceuticals Inc and Sandoz Pharma AG formed a strategic alliance to provide glucose-based drugs development and marketing services for the treatment of Type II diabetes mellitus. The partners discovered and developed compounds that regulate blood glucose production based on Gensia's technology for specifically inhibiting certain enzymes involved in the initial steps of glucose producti…
	Sandoz AG; Sandoz Pharma AG(Sandoz AG)	Affymax NV				Netherlands		2834	Provide pharmaceutical research and development services		Sandoz AG and Affymax NV entered into a research and development agreement in which Sandoz was slated to fund three years of research at Affymax to study the development of a catalytic antibody. Sandoz was to use the antibody in the manufacture of one of its pharmaceutical products. Sandoz had the option to receive certain exclusive rights to the results of the research. Affymax was to receive mi…	Sandoz agreed to fund three years of research at Affymax, while Affymax was expected to receive milestone payments and royalties on sales of any resulting products from the research.
	Ciba-Geigy AG	Aphton Corp			FL	US		2836	Biotechnology company		Ciba-Geigy signed an agreement to develop the Aphton Corp's immune system stimulants. These stimulants are used against parasites in animals.
	Chiron Corp	Avalon Ventures JH Whitney & Co LLC Kleiner Perkins Caufield IV Institutional Venture Partners			CA; CT	US		6799 6799 6726 6799	Venture capital firm JH Whitney & Co LLC, headquartered in New Canaan, Connecticut, is a private equity firm specializing in consumer/retail/brands, healthcare, specialty manufacturing and business services. The company was founded in 1946. Venture capital fund Institutional Venture Partners is a later-stage venture capital firm, headquartered in Menlo Park, California in the US. It has a total o…		Chiron Corp formed Onyx Pharmaceuticals, a joint venture with a group of venture capital investors including Avalon Ventures, Institutional Venture Partners, JH Whitney & Co and Kleiner Perkins Caufield & Byers. Onyx Pharmaceuticals would focus on the discovery and development of cancer therapeutics through research into molecular oncology mechanisms. Chiron Corp would hold 42.8% of Onyx, while 1…
	Chiron Corp	Lidak Pharmaceuticals Inc			CA	US		2834	Manufacture pharmaceuticals products; provide biotechnology research services		Lidak Pharmaceuticals, Inc. and Chiron Corp. signed an agreement to jointly develop and test potentially new immune therapies against AIDS. The agreement was based on Lidak's proprietary human immune system-reconstituted severe combined immune deficiency(SCID) mouse technology. In this process, mice with SCID are grafted with mature human peripheral blood cells to create hu-PBL-SCID mice. The gra…
	Sandoz Agro Inc(Sandoz AG)	Univ of GA Research Foundation			GA	US		8731	University of Georgia Research Foundation Inc, located in Athens, Georgia, provides research and development services for the University of Georgia. It secures gifts, contracts, and grants from industry, public and private non-profits, and government agencies for the performance of research and education. In addition to serving as the legal recipient for research awards to be conducted by the uni…		The University of Georgia Research Foundation granted Sandoz Agro, Inc. an exclusive license to develop its proprietary mite toxin gene which improves the effectiveness of baculoviruses by increasing their speed of control. After the gene is inserted into an insect virus, it produces a toxin that paralyzes the insect pest and halts further damage to the crop. Preliminary tests have indicated that…
	Ciba-Geigy AG	Genencor International Inc			NY	US		2836	Biotechnology company, focusing on the development of genetically based biological products, including gene discovery and functional genomics and molecular evolution		Ciba-Geigy, A.G. and Genencor International, Inc., a joint venture between Eastman Kodak and Cultor, signed an agreement to form a joint venture to develop, manufacture, and market environmentally correct products for the pulp and paper industry. Genencor contributed its genetic engineering technology to develop enzymes which would allow pulp to be bleached biologically. This process would use co…
	Sandoz Pharmaceuticals Corp	SyStemix Inc (is hier al van Sandoz)			CA	US		2836	Manufacture and develop cellular processes and products for the treatment of toxic side effects from chemotherapy and other medical therapies		Sandoz Pharma and Systemix agreed to collaborate to isolate a stem cell growth factor gene and each receive licensing rights. Under the agreement, Sandoz was to have worldwide rights to the growth factors for in vivo uses, while Systemix was to retain worldwide rights to use the growth factors ex vivo and the option to co-promote in vivo uses in the United States.; SyStemix and Sandoz entered int…
	Ciba-Geigy AG	Kissei Pharmaceutical Co Ltd				Japan		2834	The Group's principal activities are to manufacture and sell pharmaceutical products, mainly to practitioners. The Group is also involved in sales of pharmaceutical goods, software designing and development, information data processing services business. The operations are carried out through the following divisions: Pharmaceuticals and Others. Pharmaceutical include anti allergic agents, a blood…		Kissei Pharmaceuticals signed an agreement with Ciba-Giegy for the development of Ciba-Giegy's CGP-13774 therapeutic for allergic rhinitis and bronchial asthma. The agreement stated that Kissei Pharmaceuticals would receive marketing rights in Japan for steroid inhalation treatment. Financial terms of the agreement were not disclosed.
	Ciba-Geigy AG	SIBIA Neurosciences Inc	5		CA	US		2834	Manufacture novel small molecule therapeutics for the treatment of neurodegenerative, neuropsychiatric and neurological disorders		Ciba-Geigy, A.G. and SIBIA, Inc. signed a three-year agreement to jointly develop therapeutics for the treatment of epilepsy, stroke and other diseases of the central nervous system. The therapeutics were based on SIBIA's experience in the exploration of so-called human exictatory amino acid receptors. Exictatory amino acids include the major neurotransmitters that carry signals around the brain.…	Ciba-Geigy financed the agreement through an equity stake purchase in SIBIA valued at $5 million.
	Ciba-Geigy AG	Incyte Pharmaceuticals Inc			CA	US		8731	Provide design, development and marketing of genomic database products, software tools, and related genomic reagents and services. Company's genomic databases integrate bioinformatics software with both proprietary and, when appropriate, publicly available genetic information to create information-based tools used by pharmaceutical and biotechnology companies in drug discovery and development.		Ciba-Geigy, A.G. granted Incyte Pharmaceuticals, Inc. a license to use, develop and market a protease inhibitor derived from platelet granules known as protease nexin-1(PN-1), worldwide. PN-1 may have applications in the treatment of arthritis. In return, Ciba-Geigy received royalties on product sales. Financial terms were not disclosed.
	Ciba-Geigy AG	GlycoTech Inc			CT	US		3826	Manufacture high performance liquid chromatogrophy columns		Ciba agreed with Glycotech to jointly research and license certain areas of glycotechnology, the study and use of complex carbohydrates. Ciba stated that glycotechnology may be useful in the research and development of new generations of drugs for treatment of cancer and inflammatory or rherumatic diseases. Ciba recieved the exclusive option of developing, making, and marketing of any products yi…
	Chiron Corp	Lynx Therapeutics Inc	1.5		CA	US		8731	Provide biological research on the development and application of novel genomics analysis solutions for the discovery of gene sequence.		Lynx Therapeutics, Inc. and Chiron Corp. signed an agreement to jointly develop antisense therapeutics aimed at hepatitus B, hepatitus C, and HIV. Lynx was responsible for drug synthesis and manufacture. Chiron performed molecular biology research and development, including preclinical and clinical work. Lynx retained manufacturing rights, while Chiron was granted marketing rights in return for p…	Chiron was granted marketing rights in return for providing $1.5 million for research support.
	Sandoz Pharmaceuticals Corp	Scripps Research Institute	300		CA	US		2836	Scripps Research Institute is a biotechnology company headquartered in California. Founded in 1924.		Sandoz Pharmaceuticals and Scripps Research Institute entered into a 10-year agreement for medical research. Under the agreement, the partners were to engage in joint research projects between 1993 and 1997. Sandoz also was to provide Scripps with more than $300 million in research funding over ten years beginning in 1997. The partners' main areas included immunology, central nervous system disor…	$300 million in research funding over ten years beginning in 1997.
	Sandoz Pharma AG(Sandoz AG)	Cytel Corp	5		CA	US		8731	Provide biological research services		Cytel and Sandoz agreed to a two-year extension of a development collaboration. Sandoz was to invest several million dollars in Cytel over an eighteen-month period to restructure the companies' existing agreement. Sandoz said it made the investment because it stood behind Cytel's plan to concentrate its antigen recognition programs on the development of therapies for the treatment of chronic infe…	Sandoz was to invest an additional $5 million in Cytel.
	Sandoz Pharma AG(Sandoz AG)	Mallinkrodt Medical			MO	US		3845	Manufacture X-ray contrast media, interventional products, airway catheters, temperature monitoring products, blood and gas vital sign monitoring systems and diagnostic and therapeutic radio pharmaceuticals		Mallinckrodt Medical(MM), a unit of IMCERA, and Sandoz Pharma, A.G. signed an agreement to jointly develop and radiolabel molecules, for nuclear medicine market. Sandoz contributed its unlabeled molecule technology, in which molecules can locate a tumor, while MM shared its radiolabel technology, which emits the tumor site that had been located. Under the agreement, Sandoz granted MM exclusive wo…
	Sandoz Pharmaceuticals Corp	Magainin Pharmaceuticals Inc			PA	US		2834	Manufacture medicnes for serious diseases like antiinfectives, oncology, and pulmonary and allergic disorders		Magainin Pharmaceuticals and Sandoz Pharmaceuticals signed a joint agreement to develop and market anti-cancer products derived from magainins, natural antibiotics derived from the skin of frogs. Under the 30-month agreement, Sandoz was to make payments to Magainin for compounds selected for development. Any products developed as a result of the collaboration were to be jointly owned and marketed…	Sandoz was to fund most of the research as well as absorb all clinical and regulatory expenses.
Sanofi-Aventis	Genzyme Corp Purdue University	Genzyme Corp Purdue University			MA IN	United States United States	Research & Development Services	8731	Genzyme Corp, located in Cambridge, Massachusetts, is a biotechnology company operating through 5 segments: Renal, Therapeutics, Transplant, Biosurgery, and Genetics. The Renal segment manufactures, and distributes products that treat patients suffering from renal diseases. The Therapeutics segment provides Cerezyme/Ceredase, an enzyme replacement therapy for the treatment of Gaucher disease; Fab…		Genzyme Corp. and the Purdue University signed an agreement to jointly develop technology that can dramatically shorten the process of analyzing the oligosaccharide structures of glycoproteins. In February 1992, Genzyme introduced a new technology in which a carbohydrate intermediate released from a glycoprotein is 'trapped' with a tagging reagent. The tagged oligosaccharide can then be analyzed …	No		United States
	Hoechst AG Rhone-Poulenc SA	Hoechst AG Rhone-Poulenc SA			FF FF	Germany France	Manufacturing Services	2821	Manufacture textile and technical fibers, acetate cigarette filter tow, specialty and bulk chemicals, prescription drugs, veterinary pharmaceuticals, animal feed additives, crop protection products, engineered plastics, polyester film, resins, high density polyethylene, presensitized offset printing plates, dyes and pigments, paints, coatings and sealants; wholesale chemicals, allied products, dr…		Rhone-Poulenc, S.A. and Hoechst, A.G. signed an agreement to jointly transform acetic acid into vinyl acetate monomers(VAMs). The VAM products were to be produced at Hoechst's Taqsa facilities in Spain, and Rhone-Poulenc's Pardies, France facilities.	No		Germany France
	Hoechst AG Biotika Slavenska Lupca	Hoechst AG Biotika Slavenska Lupca		52.20 47.80	FF FF	Germany Czechoslovakia	Research & Development Services Manufacturing Services	2834	Manufacture textile and technical fibers, acetate cigarette filter tow, specialty and bulk chemicals, prescription drugs, veterinary pharmaceuticals, animal feed additives, crop protection products, engineered plastics, polyester film, resins, high density polyethylene, presensitized offset printing plates, dyes and pigments, paints, coatings and sealants; wholesale chemicals, allied products, dr…		Hoechst AG of Germany signed an agreement with Biotika Slovenska Lupca of Czechoslovakia to form Hoechst-Biotika, a joint venture which would develop and manufacture pharmaceuticals for the domestic and overseas markets. Hoechst would own 52.2% of the company.	Yes	The venture was capitalized at 22.4 mil Deutshce marks ($14 mil US).	Czechoslovakia
	Rhone-Poulenc SA DuPont	Rhone-Poulenc SA DuPont		50.00 50.00	FF DE	France United States		2869	Manufacture industrial chemicals, cosmetics, insecticides, cleaning preparations and fibers EI du Pont de Nemours & Co {DuPont}, headquartered in Wilmington, Delaware, manufactures chemical and electronic products including fluoropolymers, polymer adhesives, vinyl and laminate flooring, safety glass interlayers, sandblasting materials, lighting lamps, cleaning solvents, disinfectants, lubricants,…		Rhone-Poulenc and Du Pont agreed to extend their adiponitrile joint venture, Butachimie, to include nylon intermediate hexamethylene diamine (HMD). RP's HMD plant at Chalampe, Alsace was to be transferred to Butachimie.	Yes		France
	Regeneron Pharmaceuticals Inc Rhone-Poulenc SA University of Iowa	Regeneron Pharmaceuticals Inc Rhone-Poulenc Rorer Inc University of Iowa			NY PA IA	United States United States United States	Licensing Services Exclusive Licensing Services	2836	Regeneron Pharmaceuticals Inc, located in Tarrytown, New York, is a biopharmaceutical company, focused on the development of products for the treatment of obesity, rheumatoid arthritis and other inflammatory conditions, as well as cancer and related disorders, allergies, asthma and other serious medical conditions. Some of its therapeutic areas are in oncology, ophthalmology, cardiovascular disea…		Regeneron Pharmaceuticals Inc has received an exclusive license to Rhone-Poulenc Rorer Inc's, a subsidiary of French state-owned Rhone-Poulenc, and the University of Iowa's Glia Maturation Factor (GMF), a protein found in the human nervous system. The protein was discovered at the University of Iowa and co-developed with Rhone-Poulenc Rorer. Preclinical studies indicated that GMF's activity was d…	No		United States
	Syntex Corp Hoechst AG	Syntex Corp Hoechst AG			CA FF	United States Germany	Research & Development Services Marketing Services	2836	Manufacture prescription pharmaceuticals intended for final consumption, including biotech products and antibiotics Manufacture textile and technical fibers, acetate cigarette filter tow, specialty and bulk chemicals, prescription drugs, veterinary pharmaceuticals, animal feed additives, crop protection products, engineered plastics, polyester film, resins, high density polyethylene, presensitize…		Syntex Corp. and Hoechst, A.G. signed an agreement to jointly develop and market Syntex's leflumonide anti-rheumatic, in Europe. Terms were not disclosed.	No		United States Germany
	Rhone-Poulenc SA Corange Ltd	Rhone-Poulenc Rorer Inc Boehringer Mannheim GmbH			PA FF	United States Germany	Research & Development Services	8731	Manufacture pharmaceuticals for heart disease, strokes, hypertensive diseases and other cardiovascular diseases, infectious diseases and AIDS, depression, Alzheimer's disease and memory disorders, anxiety and panic, sleep disorders, Schizophrenia, migraines, and other central nervous system disorders and pain, beta-2 stimulants and inhaled steroids for asthma, intranasal steroids and antihistamin…		Rhone-Poulenc Rorer Inc. and Boehringer Manheim GmbH formed a strategic alliance to provide research and development services of cancer-related hypercalcemia and osteolysis therapeutic medicines globally.	No		Supranational
	Optimal Pharmacy Rhone-Poulenc SA	Immunization Products Ltd Pasteur Merieux(Inst Merieux)		33.30 33.30	CA FF	United States France	Manufacturing Services	3842	Manufacture therapeutic vaccines Manufacture and develop vaccine drugs		Immune Response and Rhone-Poulenc Rorer, through their 50/50 joint venture, Immunization Products, and Pasteur Meriuex Connaught, a joint venture between Institut Merieux S.A. and Rhone-Poulenc S.A., have formed a joint venture company to manufacture clinical and commercial supplies of Immune Response's Human Immunodeficiency Virus(HIV) vaccine. Rhone-Poulenc Rorer intended to build a plant to de…	Yes	Rhone-Poulenc Rorer and Immune Response agreed to each invest $9 million in addition to their original contributions at the start of the agreement.	United States France Canada
	Hoechst AG Triplex Pharmaceutical Corp	Hoechst AG Triplex Pharmaceutical Corp			FF TX	Germany United States	Licensing Services Research & Development Services Marketing Services Manufacturing Services Funding Services	2834	Manufacture textile and technical fibers, acetate cigarette filter tow, specialty and bulk chemicals, prescription drugs, veterinary pharmaceuticals, animal feed additives, crop protection products, engineered plastics, polyester film, resins, high density polyethylene, presensitized offset printing plates, dyes and pigments, paints, coatings and sealants; wholesale chemicals, allied products, dr…		Hoechst AG and Triplex Pharmaceuticals signed an agreement for the joint development of antiviral drugs based on Triplex's triple-helix technology. Under the agreement, Hoechst was to provide funding for five years, and agreed to pay Triplex milestone payments and royalties on sales. In return, Triplex granted Hoechst worldwide marketing and manufacturing rights to any drug agents developed under…	No	The total value of the agreement was $30 million. Hoechst also retained an option to acquire a minority stake in Triplex.	Supranational
	Syntro Corp Hoechst AG Hoechst AG	Syntro Corp Hoechst-Roessel Agri-Vet Co Hoechst Veterinaer(Hoechst AG)			CA NJ FF	United States United States Germany	Research & Development Services Funding Services	2836	Manufacture vaccines Manufacture agricultural chemicals and veterinarian pharmaceutical preparations Manufacture and wholesale pharmaceuticals		Syntro Corp., Hoechst-Roussel Agri-Vet Co. and Hoechst Veterinar, G.m.b.H. signed an agreement to develop cattle and equine vaccines based on Syntro's viral vector technology. Hoechst-Roussel Agri-Vet and Hoechst Veterinar were to provide between $6- and $7 million of funding to Syntro for research and development purposes. In return, Hoechst-Roussel Agri-Vet and Hoechst Veterinar gained exclusiv…	No	Hoechst-Roussel Agri-Vet and Hoechst Veterinar were to provide $7 million of funding to Syntro for research and development services.	United States Germany
	Hoechst AG Old World Trading	Hoechst AG Old World Trading			FF IL	Germany United States	Marketing Services Manufacturing Services	2899	Manufacture textile and technical fibers, acetate cigarette filter tow, specialty and bulk chemicals, prescription drugs, veterinary pharmaceuticals, animal feed additives, crop protection products, engineered plastics, polyester film, resins, high density polyethylene, presensitized offset printing plates, dyes and pigments, paints, coatings and sealants; wholesale chemicals, allied products, dr…		Hoechst AG and Old World Trading signed an agreement to combine their manufacturing and distribution activities for antifreeze and coolants in Europe. The agreement also included a merging of Old World Trading's and Hoechst's Hoechst Celanese unit's airport runway deicing fluids businesses in the United States.	No		Supranational
	Genzyme Corp Karlshamns AB	Genzyme Corp Karlshamns AB			MA FF	United States Sweden	Research & Development Services	2836	Genzyme Corp, located in Cambridge, Massachusetts, is a biotechnology company operating through 5 segments: Renal, Therapeutics, Transplant, Biosurgery, and Genetics. The Renal segment manufactures, and distributes products that treat patients suffering from renal diseases. The Therapeutics segment provides Cerezyme/Ceredase, an enzyme replacement therapy for the treatment of Gaucher disease; Fab…		Genzyme Corp. and Karlshamnd, A.B., a unit of Kooperativa Forbundet, signed an agreement to jointly develop phospholipids, which are used in drug delivery systems and as components of phramaceutical products. Genzyme was to market the phospholipids to the pharmaceutical industry.	No		United States Sweden
	Roche Holding AG PharmaGenics Inc	Roche Holding AG PharmaGenics Inc			FF NJ	Switzerland United States	Research & Development Services	2836	Roche Holding AG, headquartered in Basel, Switzerland, manufactures pharmaceuticals, and medical instruments, as well as, medicines, diagnostics, chemicals, and diagnostic kits. The Group's principal activities are to discover, develop, manufacture and market novel health care solutions. The Group operates through two segments namely Pharmaceuticals and Diagnostics. The Pharmaceuticals division i…		PharmaGenics Inc and Roche Holding AG have agreed to jointly develop anti-cancer oligonucleotides which modified tumor suppressor gene function. The research was begun by scientists at the Johns Hopkins University School of Medicine, and was still in the early stages of research and development. The agreement extended through early 1995. Under the terms of the agreement, PharmaGenics received exc…	No	PharmaGenics was slated to receive royalties.	United States Switzerland
	Warner-Lambert Co Rhone-Poulenc SA	Warner-Lambert Co Rhone-Poulenc Rorer Inc			NJ PA	United States United States	Research & Development Services Marketing Services	8732	Manufacture analgesics, anesthetics, anthelmintics, anticonvulsants, anti-viral agents, anti-infectives, antihistamines, cardiovascular products, antivaricosities, brochodilators, dermatologics, hemorrhoidal preps, hemostatic and hormonal agents, influenza vaccines, lipid regulators, anti-cancer agents, oxytoxics, nonsteroidal anti-inflammatory products, oral contraceptives, psychotherapeutics, u…		Warner-Lambert Co signed an agreement with Rhone-Poulenc Rorer to jointly develop and market sparfloxacin, an advanced quinolone antibiotic, which Warner-Lambert licensed from Dainippon Pharmaceuticals of Japan in 1989. As of April 1992, sparfloxacin was to enter Phase III clinical trials in the US as a treatment for community acquired infections. Under the agreement, Rhone-Poulenc Rorer would co…	No		United States Canada
	Hoechst AG Kureha Chemical Industry	Hoechst Celanese Corp(Hoechst) Kureha Chemical Industry		50.00 50.00	NJ FF	United States Japan	Manufacturing Services	2821	Manufacture textile and technical fibers, acetate cigarette filter tow, specialty and bulk chemicals, prescription drugs, veterinary pharmaceuticals, animal feed additives, crop protection products, engineered plastics, polyester film, resins, high density polyethylene, presensitized offset printing plates, dyes and pigments, paints, coatings and sealants; wholesale chemicals, allied products, dr…		Hoechst Celanese Corp. and Kureha Chemical Industry Co., Ltd. signed an agreement to form Fortron Industries, Inc., a joint venture to build and operate a multi-million-dollar polyphenylensulphide (PPS) production facility. Hoechst Celanese provided its compounding technology and marketing services to Fortron, while Kureha provided its proprietary PPS manufacturing technology. PPS is a high perfo…	Yes		United States Japan
	Paravax Inc Fisons PLC Stanley J Sarnoff Endowment	Center Laboratories(Heska) Fisons Corp(Fisons PLC) Survival Tech(Stanley)			NY MA MD	United States United States United States	Licensing Services Marketing Services	3841	Manufacture allergenic products including pollen and molds Wholesale pharmaceuticals Manufacture syringes and automatic injectors; provide cardiac monitoring services		Survival Technology licensed to Center Laboratories technology for EpiPen auto-injector for immediate treatment of allergic reactions. Center Laboratories agreed with Fisons Pharmaceuticals to jointly market the product in the US. EpiPen's pen-like auto-injector was designed to permit the immediate self-injection of epinephrine, the drug choice for emergency treatment for severe allergic reaction…	No		United States
	Xenova Ltd Genzyme Corp	Xenova Ltd Genzyme Corp			FF MA	United Kingdom United States	Research & Development Services Marketing Services	2834	Provide biological research services Genzyme Corp, located in Cambridge, Massachusetts, is a biotechnology company operating through 5 segments: Renal, Therapeutics, Transplant, Biosurgery, and Genetics. The Renal segment manufactures, and distributes products that treat patients suffering from renal diseases. The Therapeutics segment provides Cerezyme/Ceredase, an enzyme replacement therapy for …		Genzyme Corp. and Xenova, Ltd. signed a three-year agreement to jointly develop and market new pharmaceutical agents of low molecular weight. The agents were designed to treat several inflammatory diseases, such as respiratory disorders. Genzyme provided expertise in molecular and cellular biology, and synthetic chemistry, while Xenova provided expertise in screening, isolation, and characterizat…	No	Genzyme provided funding to Xenova for research and development purposes.	United Kingdom United States
	Degussa AG Fisons PLC	Asta Medica AG(Degussa Huels) Fisons PLC			FF FF	Germany United Kingdom	Marketing Services	5122	Manufacture prescription pharmaceuticals intended for final consumption, including biotech products and antibiotics Manufacture and wholesale medicines, veterinary products, laboratory and educational scientific equipment, clinical diagnostic supplies, horticultural products and medicinal and botanical chemicals and products; holding company		Asta Medica signed an agreement to market Fision's anti-asthmatic drug Tilade (nedocromil sodium). Asta subsidiary Temmler was to market the drug as Halamid. Under the terms of an earlier agreement between Asta and Fisons (December 1982) both companies co-marketed sodium cromoglycate (an astma treatment) in Germany. Fisions used the brand name Arane and Asta used Allergospasminin. Fisons discover…	No		Germany
	IVF America Inc Genzyme Corp	IVF America Inc IG Laboratories Inc			CT MA	United States United States	Research & Development Services	3826	Own and operate 22 fertility centers in major markets across the United States, a pharmaceutical subsidiary, a financing subsidiary, the Council of Physicians and Scientists, and a leading fertility portal (www.integramed.com Own and operate medical laboratories		IG Laboratories Inc, a subsidiary of Genzyme, and IVF America Inc have agreed to jointly research and develop genetic screens to test fertilized eggs for abnormal numbers of chromosomes and single gene disorders. Under the terms of the agreement, IG Labs was given the ownership rights to any genetic screens developed as a result of the collaboration. IVF America was given exclusive rights to use …	No	IG Labs completed a $1 mil US equity investment into IVF America in exchange for 136,612 shares, or a 10 percent stake.	United States
	Rhone-Poulenc SA Chugai Pharmaceutical Co Ltd	Rhone-Poulenc Rorer SA Chugai Pharmaceutical Co Ltd		50.00 50.00	FF FF	France Japan	Research & Development Services Marketing Services	8731	Manufacture chemical products Chugai Pharmaceutical Co Ltd, headquartered in Tokyo, Japan, is engaged in the manufacture of pharmaceuticals and medicinal products and diagnostic kits.		Rhone-Poulenc Rorer and Chugai Pharmaceutical entered into an agreement to develop and market Taxotere in Japan. Taxotere was extracted from the leaves of the European yew tree and had been undergoing tests in Europe as a potential treatment for cancerous solid tumors. A chemical with a similar application was Taxol, an extract from the bark of the Pacific yew; however, the extraction process des…	Yes		Japan
	Bolar Pharmaceutical Co Inc Rhone-Poulenc SA	Bolar Pharmaceutical Co Inc Rhone-Poulenc Rorer Inc			NY PA	United States United States	Research & Development Services Marketing Services Manufacturing Services	2836	Manufacture pharmaceuticals Manufacture pharmaceuticals for heart disease, strokes, hypertensive diseases and other cardiovascular diseases, infectious diseases and AIDS, depression, Alzheimer's disease and memory disorders, anxiety and panic, sleep disorders, Schizophrenia, migraines, and other central nervous system disorders and pain, beta-2 stimulants and inhaled steroids for asthma, intranas…		Bolar Pharmaceutical Co. and Rhone-Poulenc Rorer, Inc. signed an agreement to jointly develop, manufacture and market diltiazem, for the treatment of hypertension. Diltiazem is a drug that inhibits the flow of calcium in and out of the heart's muscle cells, which eases the muscle's workload and thus lowers blood pressure. Diltiazem was soon expected to gain FDA approval. In May 1992, the agreemen…	No		United States
	Hoechst AG Stuttgart University	Hoechst AG Stuttgart University			FF FF	Germany Germany	Research & Development Services	3679	Manufacture textile and technical fibers, acetate cigarette filter tow, specialty and bulk chemicals, prescription drugs, veterinary pharmaceuticals, animal feed additives, crop protection products, engineered plastics, polyester film, resins, high density polyethylene, presensitized offset printing plates, dyes and pigments, paints, coatings and sealants; wholesale chemicals, allied products, dr…		Hoechst collaborated with the Stuttgart University Institute for Display Screen Technology to develop a small matrix display using ferroelectric liquid-crystal (FLC) molecules. The molecules, which had the trade name Felix, were combined with an optimized organic orientation layer called Polix. It was thought that these FLC's would provide improved picture quality and cost less than conventional …	No		Germany
	Rhone-Poulenc SA Chugai Pharmaceutical Co Ltd	Rhone-Poulenc Rorer Inc Chugai Pharmaceutical Co Ltd			PA FF	United States Japan	Research & Development Services Marketing Services	2836	Manufacture pharmaceuticals for heart disease, strokes, hypertensive diseases and other cardiovascular diseases, infectious diseases and AIDS, depression, Alzheimer's disease and memory disorders, anxiety and panic, sleep disorders, Schizophrenia, migraines, and other central nervous system disorders and pain, beta-2 stimulants and inhaled steroids for asthma, intranasal steroids and antihistamin…		Rhone-Poulenc Rorer Inc, a subsidiary of French state-owned Rhone-Poulenc SA, and Chugai Pharmaceutical Co Ltd have agreed to jointly develop and promote Rhone-Poulenc's anti-tumor drug, Taxotere, in Japan. Taxotere treated tumorous cancers, such as ovarian, breast, and lung cancer. Unlike taxol, which was extracted from the bark of the endangered Pacific Yew, Taxotere was extracted from yew leav…	No		United States Japan
	Environmental Diagnostics Inc Rhone-Poulenc SA	Environmental Diagnostics Inc Rhone-Poulenc Diagnostics Ltd			NC FF	United States United Kingdom	Marketing Services	5122	Manufacture diagnostic and screening tests which are used to detect substances hazardous to human health Manufacture in-vitro diagnostic substances		Environmental Diagnostics, Inc. and Rhone-Poulenc Diagnostics, Ltd. (RPD), a unit of Rhone-Poulenc, signed a five-year agreement in which RPD was to market and distribute Environmental Diagnostics' EZ-Screen line of agridiagnostic and food safety testing products, and other conventional biodiagnostic products, in Europe. The products are used by the agriculture and food industries.	No		United States United Kingdom
	Noven Pharmaceuticals Inc Rhone-Poulenc SA	Noven Pharmaceuticals Inc Rhone-Poulenc Rorer Inc			FL PA	United States United States	Licensing Services Research & Development Services Marketing Services	5122	Provide commercial laboratory research services Manufacture pharmaceuticals for heart disease, strokes, hypertensive diseases and other cardiovascular diseases, infectious diseases and AIDS, depression, Alzheimer's disease and memory disorders, anxiety and panic, sleep disorders, Schizophrenia, migraines, and other central nervous system disorders and pain, beta-2 stimulants and inhaled steroids …		Noven Pharmaceuticals, Inc. granted Rhone-Poulenc Rorer, Inc.(RPR) a license to develop and market Noven's three transdermal hormone replacement therapy drug delivery systems, used in the treatment of postmenopausal disorders that include menopausal symptoms, bone loss and osteoporosis. The three products are an estrogen/progestin combination transdermal patch, a progestin transdemal patch, and a…	No	RPR funded the construction of a manufacturing facility for the production of transdermal drug delivery systems. The facility was leased to Noven, which retained the rights to purchase the facility at any time. RPR also funded all development and clinical costs for licensed products and provided Noven with certain milestone payments. In addition, RPR also acquired an undisclosed number of warrant…	United States
	Hoechst AG Cookson Group PLC	Hoechst Celanese Corp(Hoechst) KMC			NJ RI	United States United States	Research & Development Services Marketing Services Manufacturing Services	2821	Manufacture textile and technical fibers, acetate cigarette filter tow, specialty and bulk chemicals, prescription drugs, veterinary pharmaceuticals, animal feed additives, crop protection products, engineered plastics, polyester film, resins, high density polyethylene, presensitized offset printing plates, dyes and pigments, paints, coatings and sealants; wholesale chemicals, allied products, dr…		Hoechst Celanese and KMC decided to jointly develop and sell bearings using Hoechst's polybenzimidazole polymer, which was claimed to have had the highest known compressive strength of any polymer. Under the agreement, Hoechst was to contribute its materials and manufacturing expertise, while KMC was to contribute engineering technology.	No		United States
	Rhone-Poulenc SA Mantex Saica	Rhone-Poulenc Rorer Inc Mantex Saica		51.00 49.00	PA FF	United States Venezuela	Manufacturing Services	2824	Manufacture pharmaceuticals for heart disease, strokes, hypertensive diseases and other cardiovascular diseases, infectious diseases and AIDS, depression, Alzheimer's disease and memory disorders, anxiety and panic, sleep disorders, Schizophrenia, migraines, and other central nervous system disorders and pain, beta-2 stimulants and inhaled steroids for asthma, intranasal steroids and antihistamin…		Rhone-Poulenc Rorer, Inc. and Mantex signed an agreement to form a joint venture to produce chemical fibers used in cigarette filters, in Venezuela. Most of the fibers were exported to Europe. Rhone-Poulenc disclosed that the joint venture, together with a unit in Brazil, will control 80% of the South American cigarette filter market.	Yes		France Venezuela
	Rhone-Poulenc SA Eastman Kodak Co	Rhone-Poulenc Rorer Inc Sterling Winthrop Inc			PA NY	United States United States	Licensing Services Marketing Services Exclusive Licensing Services	5122	Manufacture pharmaceuticals for heart disease, strokes, hypertensive diseases and other cardiovascular diseases, infectious diseases and AIDS, depression, Alzheimer's disease and memory disorders, anxiety and panic, sleep disorders, Schizophrenia, migraines, and other central nervous system disorders and pain, beta-2 stimulants and inhaled steroids for asthma, intranasal steroids and antihistamin…		Rhone-Poulenc Rorer, Inc. granted Sterling Winthrop, Inc., a unit of Sterling Drug, a five-year exclusive license to market its Nitrong (nitroglycerin) Extended-release oral tablets in the U.S., and U.S. territories and possessions. Nitrong is used in the treatment of angina, which is a recurring pain in the chest and left arm caused by sudden loss of blood flow to the heart muscle. Rhone-Poulenc…	No		United States
	Rhone-Poulenc SA Warner-Lambert Co	Rhone-Poulenc Rorer Inc Warner-Lambert Co			PA NJ	United States United States	Licensing Services Marketing Services Manufacturing Services	2836	Manufacture pharmaceuticals for heart disease, strokes, hypertensive diseases and other cardiovascular diseases, infectious diseases and AIDS, depression, Alzheimer's disease and memory disorders, anxiety and panic, sleep disorders, Schizophrenia, migraines, and other central nervous system disorders and pain, beta-2 stimulants and inhaled steroids for asthma, intranasal steroids and antihistamin…		Rhone-Poulenc Rorer signed an agreement with Warner-Lambert whereby Warner was to sub-license a fluoroquinolone antibiotic called Penetrex, or noxacin. Under the agreement, Rhone-Poulenc was to receive rights to manufacture and market the products in the United States, Canada, and Puerto Rico. Warner-Lambert was to receive a royalty based on sales volume. Penetrex was intended to be used as a tre…	No	Warner-Lambert was to receive a royalty based on sales volume.	United States Canada
	Rhone-Poulenc SA Dainippon Pharm Co Ltd	Rhone-Poulenc SA Dainippon Pharm Co Ltd		50.00 50.00	FF FF	France Japan	Research & Development Services	8731	Manufacture industrial chemicals, cosmetics, insecticides, cleaning preparations and fibers Dainippon Pharmaceutical Co Ltd, headquartered in Osaka, Japan, is engaged in the manufacture and wholesale of pharmaceuticals, diagnostics and veterinary products. The company is also engaged in the manufacture of feeds and feed additives, food additives and chemicals. It was founded, May 14, 1897.		Rhone-Poulenc and Dainippon Pharmaceuticals formed a joint venture company in Europe to develop sparfloxacin, an advanced broad spectrum quinolone antibiotic. Sparfloxacin had the potential to become a first-line therapy with once-daily dosing for respiratory tract infections in adults.	Yes		France
	Merck & Co Inc Rhone-Poulenc SA	Merck & Co Inc Pasteur Merieux(Inst Merieux)		50.00 50.00	NJ FF	United States France	Research & Development Services Marketing Services	2836	Merck & Co Inc, located in Whitehouse Station, New Jersey, manufactures and wholesales pharmaceutical products. It offers vaccines and medicines for the treatment of high blood pressure, elevated cholesterol levels, osteoporosis, asthma, benign prostatic hyperplasia, arthritis, migraine, glaucoma, emesis, infectious diseases (antibacterial, antifungal, and antiviral agents), and vaccines to preve…		Merck & Co. and Pasteur Merieux Serums & Vaccins, S.A., a unit of Institut Merieux, signed an agreement to form a joint venture to co-promote combination pediatric vaccines developed as a result of a collaborative development agreement between Merck and Connaught Laboratories, a unit of Pasteur Merieux, in Europe. The joint venture also developed new combination vaccines within the European Commu…	Yes		United States France
	Rhone-Poulenc SA Sie Chimique Prayon-Rupel	Rhone-Poulenc SA Sie Chimique Prayon-Rupel		50.00 50.00	FF FF	France Belgium		2819	Manufacture industrial chemicals, cosmetics, insecticides, cleaning preparations and fibers Manufacture industrial chemicals		Rhone-Poulenc and Societe Chimique Prayon-Rupel agreed to form a joint venture company called Europhos to consolidate non-U.S. operations for specialty phosphates and dishwasher sodium tripolyphosphates. The venture was expected to be launched at the end of 1992. Additional information was not disclosed. Societe Chimique Prayon was to build a new sodium tripolyphosphate plant in Engis, Belgium.	Yes	The venture was capitalized at $30 million.	Supranational
	CompuMed Inc Rhone-Poulenc Rorer Pharm	CompuMed Inc Rhone-Poulenc Rorer Pharm		50.00 50.00	CA FF	United States Ireland-Rep	Marketing Services	5122	CompuMed Inc, located in Los Angeles, California, manufactures, develops and wholesales electrocardiogram computer analysis equipment specializing in telemonitoring imaging and analysis. Its core products include the OsteoCare, OsteoGram and CardioGram. The company was founded in 1973. Manufacture pharmaceuticals		CompuMed, Inc and Rhone-Poulenc Rorer Pharmaceutical completed their joint venture. CompuMed Inc dislclosed it was in negotiations with several major pharmaceuticals companies about the formation of a joint venture to market CompuMed's OsteoGram, and its therapeutics for the prevention and treatment of osteoporosis.	Yes		United States
	Hoechst AG Valspar Corp	Hoechst AG Valspar Corp			FF MN	Germany United States	Licensing Services Marketing Services Manufacturing Services Exclusive Licensing Services	5169	Manufacture textile and technical fibers, acetate cigarette filter tow, specialty and bulk chemicals, prescription drugs, veterinary pharmaceuticals, animal feed additives, crop protection products, engineered plastics, polyester film, resins, high density polyethylene, presensitized offset printing plates, dyes and pigments, paints, coatings and sealants; wholesale chemicals, allied products, dr…		Valspar has been granted an exclusive U.S. marketing and production license by Hoechst subsidiary Herberts for its laminates.	No		Germany United States
	Hoechst AG Shionogi & Co Ltd	Hoechst Japan Ltd(Hoechst AG) Shionogi & Co Ltd			FF FF	Japan Japan	Marketing Services	5122	Produce proteins from gene modification, as well as other manmade organic fibers; wholesale drugs and chemicals Shionogi & Co Ltd, headquartered in Osaka, Japan, is a pharmaceutical company. It is engaged in the research, development, purchase, manufacture and sale of pharmaceuticals, as well as pharmaceutical-related businesses. The Company mainly provides vitamin preparations, analgesic antipyr…		Hoechst Japan Ltd, a subsidiary of Hoechst AG, and Shionogi & Co Ltd have entered into an agreement in which Shionogi received marketing rights in Japan to Hoechst's HR-810 injectable cephen antibiotic, named Cefrom. Hoechst jointly developed the antibiotic with Roussel Uclaf, another Hoechst subsidiary. Cefrom was awaiting approval and was expected to be launched in 1993. Financial terms were no…	No		Japan
	Snyckers Family Hoechst AG	Snyckers Family Hoechst South Africa Ltd		40.00 60.00	VA FF	United States South Africa	Manufacturing Services	2834	Individual Manufacture pharmaceuticals, industrial chemicals and chemical preparations, as well as diagnostic substances; holding company		Hoechst South Africa Pty Ltd, a unit of Hoechst AG, agreed to acquire a 60% share in Noristan Holdings Ltd, a unit of Hoescht South Afirca, from the Snyckers family, resulting in the formation of a joint venture. As part of the agreement, Noristan was to take over Hoechst SA's pharmaceuticals and diagnostics activities. Noristan specialized in pharmaceutical and cosmetic products as well as hospi…	Yes		South Africa
	Rhone-Poulenc SA DuPont	Lemmon Co(A Nattermann & Cie) Du Pont Merck Pharmaceutical			PA DE	United States United States	Marketing Services	5122	Manufacture pharmaceuticals and antibiotics Manufacture and wholesale pharmaceutical products and electromedical devices		Lemmon Co., a subsidiary of Teva Pharmaceutical, entered into an agreement with Du Pont Merck Pharmaceutical (DMP) in which it was granted exclusive marketing rights for DMP's Moban anti-psychotic agent, and other ethical products for the treatment of disorders of the central nervous system. Teva was to sell Moban through its branded drug unit, Gate Pharmaceuticals. Teva also signed a distributio…	No		Supranational
	Hoechst AG Chinese Ministry of the Chem	Hoechst AG Chinese Ministry of the Chem			FF FF	Germany China	Marketing Services Manufacturing Services	2821	Manufacture textile and technical fibers, acetate cigarette filter tow, specialty and bulk chemicals, prescription drugs, veterinary pharmaceuticals, animal feed additives, crop protection products, engineered plastics, polyester film, resins, high density polyethylene, presensitized offset printing plates, dyes and pigments, paints, coatings and sealants; wholesale chemicals, allied products, dr…		Hoechst, A.G. and the Chinese Ministry for Chemicals signed an agreement to cooperate in the fields of organic chemicals, industrial plastics, pesticides, dyes, pigments and industrial fibers. Terms were not disclosed.	No		Germany China
	Rexene Corp Hoechst AG	Rexene Corp Hoechst AG			NY FF	United States Germany	Marketing Services	5162	Manufacture thermoplastic and petrochemical products including polyethylene and polypropylene resins and styrene used in the manufacture of bags, food packaging, paper, cable coatings, housewares, toys, automotive components, appliance parts, and housewares; manufacture plastic film used in disposable diapers, feminine hygiene products, medical products, packaging and tapes Manufacture textile an…		Hoechst, A.G. and Rexene Corp. signed an agreement in which Hoechst was to market Rexene's amorphous polyalphaolefin(APAO) polymers, in Europe. APAOs are used in hot-melt adhesives and sealants. Terms were not disclosed.	No		United States Germany
	Hoechst AG United States of America	Hoechst Celanese Corp(Hoechst) Rutgers State University			NJ NJ	United States United States	Research & Development Services Funding Services	8731	Manufacture textile and technical fibers, acetate cigarette filter tow, specialty and bulk chemicals, prescription drugs, veterinary pharmaceuticals, animal feed additives, crop protection products, engineered plastics, polyester film, resins, high density polyethylene, presensitized offset printing plates, dyes and pigments, paints, coatings and sealants; wholesale chemicals, allied products, dr…		Hoechst Celanese agreed to provide Rutgers University with funding for research in materials science and neuroscience. The program was to last three-and-a-half years.	No	Hoechst was to provide funding for Rutgers research. The exact amount given to Rutgers was not disclosed; however it was disclosed that Hoechst had given a total of $3 million to Rutgers and two other universities.	United States
	Hoechst AG North Carolina State Univ	Hoechst Celanese Corp(Hoechst) North Carolina State Univ			NJ NC	United States United States	Research & Development Services Funding Services	8734	Manufacture textile and technical fibers, acetate cigarette filter tow, specialty and bulk chemicals, prescription drugs, veterinary pharmaceuticals, animal feed additives, crop protection products, engineered plastics, polyester film, resins, high density polyethylene, presensitized offset printing plates, dyes and pigments, paints, coatings and sealants; wholesale chemicals, allied products, dr…		Hoechst Celanese and North Carolina State University signed an agreement for research in environmental science. Hoechst signed agreements with other universities as well for a three-an-a-half year period and was to spend $3 million.	No	The amount of funding was not disclosed; however, it was known that the Hoechst was providing $3 million in funding for research at NCSU and two other universities.	United States
	Rhone-Poulenc SA Hoechst-Roussel Canada Inc	Rhone-Poulenc Rorer Canada Hoechst-Roussel Canada Inc			FF FF	Canada Canada	Marketing Services	2833	Manufacture and wholesale pharmaceuticals Wholesale biotechnological drugs and drug proprietaries		Rhone-Poulenc Rorer Canada (RPR Canada), a unit of Rhone-Poulenc Rorer Inc, and the dental division of Hoechst-Roussel Canada Inc, a subsidiary of Hoechst AG, have entered into an agreement in which Hoechst received exclusive, Canadian marketing rights to RPR Canada's oral antibiotic, Rovamycine, prescribed for cavities of the mouth. Hoechst planned to market the antibiotic to the Canadian dental…	No		Canada
	ICI PLC Hoechst AG	Astra AB Hoechst AG			FF FF	Sweden Germany	Marketing Services	5122	Manufacture prescription pharmaceuticals intended for final consumption, including biotech products and antibiotics Manufacture textile and technical fibers, acetate cigarette filter tow, specialty and bulk chemicals, prescription drugs, veterinary pharmaceuticals, animal feed additives, crop protection products, engineered plastics, polyester film, resins, high density polyethylene, presensitize…		Astra Pharmaceutical, A.B. and Hoechst, A.G. signed an agreement in which Hoechst was to co-market Astra's anti-hypertensive, beta blocker, metoprolol, in Europe. Terms were not disclosed.	No		Sweden Germany
	Glaxo Holdings PLC Rhone-Poulenc SA	SmithKline Beecham PLC Dermik Laboratories			FF PA	United Kingdom United States	Marketing Services	5122	Manufacture, research and develop medicinal chemicals and botanical products, human and veterinary ethical pharmaceuticals and over the counter medicines; consumer and health products, including toiletries, cosmetics and food and drink products, specialty cleaning and sanitation preparations; own and operate medical laboratories; produce animal feeds; manufacture laboratory analytical instruments…		SmithKline Beecham granted Dermik Laboratories the right to sell its Bactroban ointment to dermatologists, general practitioners, and pediatricians in the United States. Bactroban was the first topical antibiotic ointment with specific activity to combat staphylococcus and streptococcus skin irritations. It was intended to be used as a treatment against impetigo.	No		United States
	Ecogen Inc Rhone-Poulenc SA Roussel-Uclaf SA	Ecogen Inc Pasteur Merieux(Inst Merieux) Roussel-Uclaf SA			PA FF FF	United States France France	Research & Development Services	8731	Manufacture biological pesticides for forestry, public health, and home garden application. Manufacture and develop vaccine drugs Manufacture pharmaceutical, chemical, and veterinary products		Ecogen signed a three-year research and development agreement with the Institut Pasteur for microorganism-based biopesticides. Roussel-Uclaf the industrial sponsor of the research, the Institut Nationale de Recherche Agronomique and other organizations agreed to work with the partners. Ecogen and Roussel agreed to share the rights to the biopesticide technology and join with the Institut Merieux …	No		United States France
	CompuMed Inc Rhone-Poulenc SA	CompuMed Inc Rhone-Poulenc Rorer Inc			CA PA	United States United States	Marketing Services	5047	CompuMed Inc, located in Los Angeles, California, manufactures, develops and wholesales electrocardiogram computer analysis equipment specializing in telemonitoring imaging and analysis. Its core products include the OsteoCare, OsteoGram and CardioGram. The company was founded in 1973. Manufacture pharmaceuticals for heart disease, strokes, hypertensive diseases and other cardiovascular diseases,…		CompuMed signed Rhone-Poulenc Rorer to a two-year agreement to help it sell and promote its OsteoGram. OsteoGram used standard X-ray equipment to measure bone mineral density as an indicator of osteoporosis. Rhone-Poulenc Rorer also agreed to purchase OsteoGram starter kits and distribute them free to 10,000 physicians active in the the treatment of osteoporosis.	No		United States
	Hoechst AG Hoechst AG	Hoechst AG Wacker-Chemie GmbH		50.00 50.00	FF FF	Germany Germany	Marketing Services Manufacturing Services	2821	Manufacture textile and technical fibers, acetate cigarette filter tow, specialty and bulk chemicals, prescription drugs, veterinary pharmaceuticals, animal feed additives, crop protection products, engineered plastics, polyester film, resins, high density polyethylene, presensitized offset printing plates, dyes and pigments, paints, coatings and sealants; wholesale chemicals, allied products, dr…		Hoechst, A.G. and Wacker-Chemie, G.m.b.H. agreed to merge their respective polyvinylchloride (PVC) operations, into a joint venture operation. The proposed joint venture would have a production capacity of 620,000 m.t./year, employ 1,400, and have annual sales of DM880 million. The participants cited over-production, failing prices and declining profits in the synthetics market as reasons for the…	Yes	Annual sales of DM880 million.	Germany
	Mediolanum Farmaceutici SpA Roussel-Uclaf SA	Mediolanum Farmaceutici SpA Laboratoires Houde SA			FF FF	Italy France	Licensing Services	2836	Mediolanum Farmaceutici SpA, located in Milan, Italy, manufactures pharmaceuticals. Manufacture pharmaceuticals		Mediolanum Farmaceutici S.p.A. licensed its compound Dermatan Sulfate, code MF 701, to Laboratoires Houde.	No		Italy France
	Perrigo Co Copley Pharmaceutical Inc	Perrigo Co Copley Pharmaceutical Inc			MI MA	United States United States	Marketing Services	5122	Perrigo Co, located in Allegan, Michigan, is a biotechnology company. Manufacture pharmaceutical products		Perrigo Co. and Copley Pharmaceutical, Inc. signed an agreement in which Perrigo was to market Copley's generic yeast infection treatment, Miconazole cream to the store brand retail market. Miconazole had been newly-approved, at the time of the agreement.	No		United States
	Rhone-Poulenc SA Encopharm(Algeria) Enopharm(Algeria) Enapharm(Algeria) Saidal(Algeria) CH Boehringer Sohn AG & Co KG Bristol-Myers Squibb Co Ciba-Geigy AG Hoechst AG Warner-Lambert Co	Rhone-Poulenc Rorer Inc Encopharm(Algeria) Enopharm(Algeria) Enapharm(Algeria) Saidal(Algeria) Boehringer Ingelheim Intl GmbH Bristol-Myers Squibb Co Ciba-Geigy AG Hoechst-Roussel Pharm Parke-Davis & Co		35.00 10.00 10.00 10.00 10.00 5.00 5.00 5.00 5.00 5.00	PA FF FF FF FF FF NY FF NJ NJ	United States Algeria Algeria Algeria Algeria Germany United States Switzerland United States United States	Marketing Services	5122	Manufacture pharmaceuticals for heart disease, strokes, hypertensive diseases and other cardiovascular diseases, infectious diseases and AIDS, depression, Alzheimer's disease and memory disorders, anxiety and panic, sleep disorders, Schizophrenia, migraines, and other central nervous system disorders and pain, beta-2 stimulants and inhaled steroids for asthma, intranasal steroids and antihistamin…		Rhone-Poulenc Rorer, Encopharm, Enopharm, Enapharm, Saidal, Boehringer Ingelheim, Bristol-Myers Squibb, Ciba-Geigy, Hoechst Roussel, and Parke Davis agreed to form a joint venture to import group products made by Rhone-Poulenc Rorer and its commercial partners. RPR was to hold a 35% stake, the Algerian companies 40%, and the other partners 25%.	Yes	The new company was to invest $69.7 million (370 million francs) over three years to build a new drug factory in Algeria.	Algeria
	ICI PLC Rhone-Poulenc SA	Astra AB Rhone-Poulenc Inc			FF NJ	Sweden United States	Marketing Services	5122	Manufacture prescription pharmaceuticals intended for final consumption, including biotech products and antibiotics Manufacture herbicides, insecticides, animal feed additives, aroma chemicals, silicones, plastics and packaging film; Phosphate mining		Rhone-Poulenc granted Astra the right to market its local anesthetics in Frace. The agreement was to take effect on January 1, 1993.	No		France
AstraZeneca	Calgene Inc Mogen International NV	Calgene Inc Mogen International NV			CA FF	United States Netherlands	Licensing Services	0191	Own and operate greenhouse; produce and develop agricultural seeds, edible plant oils, and horticultural crops; provide plant DNA research and development services Provide plant biotechnology research services		MOGEN International granted Calgene a license to its technology for transforming broad-leaved, dicotyledonous crops. This agreement was the first licensing agreement for MOGEN with an American company.	No		United States
	US Bioscience Inc Glaxo Holdings PLC	US Bioscience Inc SmithKline Beecham PLC			PA FF	United States United Kingdom	Research & Development Services Marketing Services Manufacturing Services	2836	Manufacture pharmaceuticals; provide research services Manufacture, research and develop medicinal chemicals and botanical products, human and veterinary ethical pharmaceuticals and over the counter medicines; consumer and health products, including toiletries, cosmetics and food and drink products, specialty cleaning and sanitation preparations; own and operate medical laboratories; produce anim…		U.S. Bioscience, Inc. and SmithKline Beecham, plc. signed an agreement to jointly market and develop US Bioscience's Ethyol and WR-151327 agents, and PALA modulator, in Japan, South Korea and Taiwan. Ethyol and WR-151327 are agents designed to protect normal tissue form some of the side effects of chemotherapy and radiation therapy. PALA is a biochemical modulator designed to enhance the activity…	No		Japan South Korea Taiwan
	MedImmune Inc Cell Genesys Inc	MedImmune Inc Cell Genesys Inc			MD CA	United States United States	Licensing Services Research & Development Services	2836	Manufacture vaccines which include Synagis (palivizumab), Ethyol (amifostine), FluMist (Influenza Virus Vaccine Live, Intranasal), and CytoGam (cytomegalovirus immune globulin intravenous (human)) and with additional products in clinical testing; provide research and development services to discover, develop, manufacture and market products that treat or prevent infectious disease, cancer and inf…		MedImmune, Inc. granted Cell Genesys, Inc. an exclusive worldwide license to use its anti-HIV antibodies for Cell Genesys' development of cytotoxic T cell transplant products for the treatment of AIDS. T cells are a type of white blood cells which comprise part of the body's immune defense mechanism against certain types of infection and malignancy. In exchange, MedImmune was to receive licensing…	No		United States
Abbott	Unimed Pharmaceuticals Inc LecTec Corp	Unimed Pharmaceuticals Inc LecTec Corp			NJ TX	United States United States	Research & Development Services Manufacturing Services	3841	Manufacture pharmaceuticals LecTec Corp, located in Texarkana, Texas, provides intellectual property licensing services. It is also a holding company.		Unimed, Inc. and LecTec Corp. signed an agreement to develop Unimed's Marinol in a transdermal drug delivery system. LacTec was to develop and manufacture a suitable transdermal system for Unimed's Marinol. Marinol is an antinausea drug used for appetite stimulation and prevention of weight loss in AIDS and cancer chemotherapy patients.	No		United States
	Abbott Laboratories Abbott Laboratories	TAP Pharmaceutical Products Abbott Laboratories			IL IL	United States United States	Marketing Services	5122	TAP Pharmaceutical Products Inc, located in Lake Forest, Illinois, is pharmaceutical manufacturing firm that markets their products under the Prevacid and Lupron Depot brands. The company was founded in 1977. Abbott Laboratories, headquartered in Abbott Park, Illinois, manufactures and wholesales general pharmaceuticals and medical equipment. The company operates through its four divisions namely…		TAP Pharmaceuticals and Abbott Laboratories, Inc. signed an agreement to jointly market Abbott Labs' Omniflox in the United States to urologists and obstetricians/gynecologists. Abbott Labs' Omniflox is a quinolone antibiotic used in the treatment of lower respiratory tract, genitourinary and skin infections.	No		United States
	Dainippon Pharm Co Ltd Abbott Laboratories	Dainippon Pharm Co Ltd Abbott Laboratories		24.00 76.00	FF IL	Japan United States	Research & Development Services Marketing Services	2836	Dainippon Pharmaceutical Co Ltd, headquartered in Osaka, Japan, is engaged in the manufacture and wholesale of pharmaceuticals, diagnostics and veterinary products. The company is also engaged in the manufacture of feeds and feed additives, food additives and chemicals. It was founded, May 14, 1897. Abbott Laboratories, headquartered in Abbott Park, Illinois, manufactures and wholesales general p…		Dainippon Pharmaceutical Co. and Abbott Laboratories formed a joint venture named Dainabot, K.K., to develop and market therapeutic biotech products and pharmaceuticals in Japan. The joint venture was capitalized at 2.27 bil yen (0.0181 mil US).	Yes	The joint venture was capitalized at 2.27 bil yen (0.0181 mil US)	Japan
	Abbott Laboratories IVAX Corp	Abbott Laboratories Norton Healthcare(IVAX Corp)			IL FF	United States United Kingdom	Licensing Services Marketing Services	5122	Abbott Laboratories, headquartered in Abbott Park, Illinois, manufactures and wholesales general pharmaceuticals and medical equipment. The company operates through its four divisions namely, Pharmaceutical Products, which offers adult and pediatric pharmaceuticals; Diagnostic Products, responsible for providing diagnostic systems and tests for blood banks, hospitals, commercial laboratories, phy…		Abbott Laboratories, Inc. granted Norton Healthcare, a unit of Ivax Corp., a license to market Abbott Lab's Cordilox, (an immediate release version of verapamil) for hypertension, angina and arrhythmias, in the U.K.	No		United Kingdom
	LifeScience Corp Unimed Pharmaceuticals Inc	LifeScience Corp Unimed Pharmaceuticals Inc			UN NJ	United States United States	Retail & Wholesale Services	5122	Manufacture biological products Manufacture pharmaceuticals		Unimed, Inc. and LifeScience Corp. signed an agreement in which Unimed received exclusive rights to market LifeScience's Ondrox nutritional supplement, in the U.S. and Canada. Ondrox contains antitoxidants, vitamins and minerals in a timed-release formulation. Ondrox has been used by cancer patients for its ability to neutralize 'free radicals', which damage genetic material in cells.	No		United States Canada
	Zuellig Group NA Inc Abbott Laboratories	Metro Drug Inc Abbott Laboratories			FF IL	Philippines United States	Marketing Services	5122	Wholesale drug products Abbott Laboratories, headquartered in Abbott Park, Illinois, manufactures and wholesales general pharmaceuticals and medical equipment. The company operates through its four divisions namely, Pharmaceutical Products, which offers adult and pediatric pharmaceuticals; Diagnostic Products, responsible for providing diagnostic systems and tests for blood banks, hospitals, comm…	Terminated	Metro Drug, a unit of Hong Kong-based First Pacific Co., gave formal notice to terminate its distribution agreement with Abbott Laboratories effective November 30, 1992. The decision followed negotiations initiated last year by Metro Drug on restructuring the agreement.	No		United States
	DynaGen Inc International Murex Tech Corp	DynaGen Inc International Murex Tech Corp			MA FF	United States Canada	Licensing Services Marketing Services Manufacturing Services	2835	Manufacture and wholesale diagnostic substances and pharmaceutical products for health care markets; specialize in smoking cessation products Manufacture in-vitro test systems to detect, monitor and screen for infectious diseases and other medical conditions		DynaGen settled litigation with International Murex Technologies by signing an agreement that granted Murex worldwide manufacturing and sales rights to products based on DynaGen's proprietary technologies. The agreement replaced a previous agreement between DynaGen and the Wellcome Foundation for the manufacture and sale of tuberculosis tests. Under the terms of the new agreement, DynaGen will re…	No	DynaGen was to receive $625,000 from International Murex and a royalty from worldwide sales of products by Murex.	Supranational
	NORAC Co Unimed Pharmaceuticals Inc	NORAC Co Unimed Pharmaceuticals Inc			CA NJ	United States United States	Supply Services	2834	Manufacture medicinal chemicals, including the active ingredient for Marinol, the drug used to treat nausea in cancer chemotherapy patients Manufacture pharmaceuticals		NORAC agreed to supply Unimed with Delta-9-tetrahydrocannibol, the active ingredient in Unimed's Marinol, an intended treatment for nausea and vomiting associated with cancer chemotherapy. Unimed also sought the FDA's approval of the drug as an appetite stimulant and weight-gain promoter for AIDS patients.	No		United States
	Unimed Pharmaceuticals Inc NORAC Co	Unimed Pharmaceuticals Inc NORAC Co		100	NJ CA	United States United States	Manufacturing Services	2834	Manufacture pharmaceuticals Manufacture medicinal chemicals, including the active ingredient for Marinol, the drug used to treat nausea in cancer chemotherapy patients		NORAC and Unimed formed a joint venture called Andos Chemical to manufacture Marinol, an appetite stimulant and anti-emetic. In November 1992, Unimed transferred its 51% holding to NORAC.	Yes		Sweden
	North American Biologicals Inc Abbott Laboratories	North American Biologicals Inc Abbott Laboratories			FL IL	United States United States	Licensing Services Exclusive Licensing Services	5122	Provide human plasma research and distribution services Abbott Laboratories, headquartered in Abbott Park, Illinois, manufactures and wholesales general pharmaceuticals and medical equipment. The company operates through its four divisions namely, Pharmaceutical Products, which offers adult and pediatric pharmaceuticals; Diagnostic Products, responsible for providing diagnostic systems and tests …		Abbott Labs and North American Biologicals Inc (NABI) entered into an equity stake agreement in which NABI acquired Abbott's plasma-based hepatitis immune globulin (H-BIG) and also received the exclusive rights to acquire Abbott's experimental HIVIG product. H-BIG provided passive immunity from exposure to hepatitis B, while HIVIG was expected to prevent the transmission of AIDS from HIV-positive…	No	Abbott Labs received 2 million shares, or 16% of outstanding shares, of North American Biologicals Inc. Abbott's H-BIG had sales of $5 mil US per year, while worldwide sales for immune globulin products were expected to be over $500 mil US. Abbott Labs was also slated to receive royalties from North American Biologicals based upon sales of the products.	United States Supranational
	Research Industries Corp Abbott Laboratories	Research Industries Corp Abbott Laboratories			UT IL	United States United States	Marketing Services	5122	Manufacture and wholesale specialized cardiovascular, vascular and blood management surgical devices and specialty pharmaceuticals Abbott Laboratories, headquartered in Abbott Park, Illinois, manufactures and wholesales general pharmaceuticals and medical equipment. The company operates through its four divisions namely, Pharmaceutical Products, which offers adult and pediatric pharmaceuticals; D…		Research Industries Corp.(RIC) and Abbott Laboratories, Inc. signed an agreement in which RIC was to market and distribute Abbott's 'Plegisol' cardioplgia solution under the trade name 'Plegilyte'. Plegisol is used for heart muscle prevention during cardiovascular surgery. Abbott continued to market Plegisol.	No		United States
	Imco Resources Ltd Abbott Laboratories	Imco Resources Ltd Abbott Laboratories			FF IL	Canada United States	Licensing Services Research & Development Services Marketing Services Exclusive Licensing Services	2835	Asbestos mining Abbott Laboratories, headquartered in Abbott Park, Illinois, manufactures and wholesales general pharmaceuticals and medical equipment. The company operates through its four divisions namely, Pharmaceutical Products, which offers adult and pediatric pharmaceuticals; Diagnostic Products, responsible for providing diagnostic systems and tests for blood banks, hospitals, commercial l…		ImClone Systems, Inc. and Abbott Laboratories formed an alliance to cooperate in the area of medical diagnostics. Through the alliance, ImClone granted Abbott an exclusive license to market its Repair Chain Reaction(RPR), its proprietary target amplification technology, the AmpliProbe DNA/RNA probe system, as well as other diagnostic products for cancer and infectious disease, worldwide. In retur…	No		United States
Merck	Centre National de Recherche Genset SA	Centre National de Recherche Genset SA			FF FF	France France	Research & Development Services Marketing Services	2836	Centre National de la Recherche Scientifique, located in France and founded in 1939, provides research and development services. Provide biological research services		Genset and the Centre Nationale de la Recherche Scientifique have agreed to jointly research ribozymes and antisense oligonucleotides for the development of antiviral therapeutics. The research was slated to focus on molecules against c-myc, SV 40T Antigen and HIV tat gene, and the coupling of these molecules to ply-L-lysine. The research was to be conducted at the University of Montpellier II. U…	No		France
	Teijin Ltd Merck & Co Inc	Teijin Ltd Banyu Pharmaceutical Co Ltd		50.00 50.00	FF FF	Japan Japan	Research & Development Services	8733	Teijin Ltd, headquartered in Osaka, Japan, is engaged in the manufacture, processing and sale of chemical products. The High-Function Fiber segment is engaged in the manufacture and sale of aramid fiber and carbon fiber products. The Polyester Fiber segment involves in the manufacture and sale of synthetic fiber. The Chemical Products segment involves in the manufacture and sale of polyester film…		Banyu Pharmaceuticals signed an agreement with Chinese state-owned Teijin Ltd to collaborate on Phase II clinical trials for biphosphonate alendronate, intended for the treatment of hypercalcemia of malignancy and osteoporosis. Phase I clinical trials were conducted by each company separately. Both companies collaborated to develop an injectable and an oral form of the drug.	No		Japan
	Syntro Corp Hoechst AG Hoechst AG	Syntro Corp Hoechst-Roessel Agri-Vet Co Hoechst Veterinaer(Hoechst AG)			CA NJ FF	United States United States Germany	Research & Development Services Funding Services	2836	Manufacture vaccines Manufacture agricultural chemicals and veterinarian pharmaceutical preparations Manufacture and wholesale pharmaceuticals		Syntro Corp., Hoechst-Roussel Agri-Vet Co. and Hoechst Veterinar, G.m.b.H. signed an agreement to develop cattle and equine vaccines based on Syntro's viral vector technology. Hoechst-Roussel Agri-Vet and Hoechst Veterinar were to provide between $6- and $7 million of funding to Syntro for research and development purposes. In return, Hoechst-Roussel Agri-Vet and Hoechst Veterinar gained exclusiv…	No	Hoechst-Roussel Agri-Vet and Hoechst Veterinar were to provide $7 million of funding to Syntro for research and development services.	United States Germany
	Teijin Ltd Merck KGaA	Teijin Ltd Merck KGaA			FF FF	Japan Germany	Licensing Services Marketing Services	2836	Teijin Ltd, headquartered in Osaka, Japan, is engaged in the manufacture, processing and sale of chemical products. The High-Function Fiber segment is engaged in the manufacture and sale of aramid fiber and carbon fiber products. The Polyester Fiber segment involves in the manufacture and sale of synthetic fiber. The Chemical Products segment involves in the manufacture and sale of polyester film…		Teijin Ltd. licensed the marketing of a bone disorder and psoriasis therapeutic to E. Merck A.G. The drug "TV-02," known in Japan as "Bonealfa," is an active vitamin D3 preparation for treating bone disorders. It also has applications in treating psoriasis, which has a high incidence in Europe and the United States. Teijin has also established licensing agreements with Dr. Esteve SA of Spain, Ins…	No		Japan Germany
	SIBIA Neurosciences Inc University of CA at Irvine	SIBIA Neurosciences Inc University of CA at Irvine			CA CA	United States United States	Research & Development Services	2836	Manufacture novel small molecule therapeutics for the treatment of neurodegenerative, neuropsychiatric and neurological disorders University		SIBIA Inc and the University of California, Irvine disclosed in April 1992 that they had developed a promising new clinical test that they believed would greatly facilitate the diagnosis of Alzheimer's disease. The test was also to permit more rapid development of therapeutic treatments for the disease. The research findings were reported in the April 1 issue of The Proceedings of the National Ac…	No		United States
	ImmuLogic Pharmaceutical Corp Merck & Co Inc	ImmuLogic Pharmaceutical Corp Merck & Co Inc			MA NJ	United States United States	Research & Development Services	2836	Manufacture biological products used to treat allergies and autoimmune diseases Merck & Co Inc, located in Whitehouse Station, New Jersey, manufactures and wholesales pharmaceutical products. It offers vaccines and medicines for the treatment of high blood pressure, elevated cholesterol levels, osteoporosis, asthma, benign prostatic hyperplasia, arthritis, migraine, glaucoma, emesis, infectious d…		ImmuLogic Pharmaceutical Corp. and Merck & Co. signed an agreement to extend their collaborative research program until September 1993. The program was focused on development of new treatments for autoimmune diseases such as rheumatoid arthritis and type I diabetes. The agreement extended a collaboration that began in 1989. The initial agreement called for Merck to fund the ImmuLogic research eff…	No		United States
	Genset SA Moscow State University	Genset SA Moscow State University			FF FF	France Russian Fed	Research & Development Services	8731	Provide biological research services University		Genset and Moscow State University's Laboratory of Nucleic Acid Chemistry signed an agreement to jointly study the chemical synthesis of certain antisense oligonucleotides. The collaboration was to receive six Russian scientists during a three-year period.	No		France Russian Fed
	SIBIA Neurosciences Inc Eli Lilly & Co	SIBIA Neurosciences Inc Eli Lilly & Co			CA IN	United States United States	Research & Development Services	2836	Manufacture novel small molecule therapeutics for the treatment of neurodegenerative, neuropsychiatric and neurological disorders Eli Lilly & Co, located in Indianapolis, Indiana, manufactures and wholesales pharmaceuticals and diagnostic and animal health products. The company specializes in research and development, production and marketing of products for the treatment of diabetes worldwide. I…		SIBIA, Inc. and Eli Lilly & Co., Inc. signed a three-year agreement to jointly develop discovery technology and drugs for the treatment of central nervous system diseases. The agreement focused on recently isolated molecules located on the surface of nerve cells in the brain, which control the entry of calcium ions into these cells. The calcium channels are believed to play a major role in a numb…	No	Eli Lilly financed the agreement through a $4 million equity stake purchase in SIBIA.	United States
	Merck & Co Inc DuPont	Merck & Co Inc Du Pont Merck Pharmaceutical			NJ DE	United States United States	Licensing Services Marketing Services	5122	Merck & Co Inc, located in Whitehouse Station, New Jersey, manufactures and wholesales pharmaceutical products. It offers vaccines and medicines for the treatment of high blood pressure, elevated cholesterol levels, osteoporosis, asthma, benign prostatic hyperplasia, arthritis, migraine, glaucoma, emesis, infectious diseases (antibacterial, antifungal, and antiviral agents), and vaccines to preve…		Merck & Co. licensed the trademark and marketing rights to its Prinivil (lisinopril) and Prinzide (lisinopril-hydrocholorothiazide) brands to Du Pont Merck Pharmaceuticals and its subsidiaries in the United Kingdom, Spain, France, Germany, and Italy. The formal transfer of rights was expected to take several months due to regulatory requirements in each country. After the transfer, Merck will not…	No		France Germany Italy Spain United Kingdom
	Liposome Co Inc Merck & Co Inc	Liposome Co Inc Merck & Co Inc			NJ NJ	United States United States	Research & Development Services	8731	Manufacture pharmaceutical products using cell lipid technology including TLC LA-19 Merck & Co Inc, located in Whitehouse Station, New Jersey, manufactures and wholesales pharmaceutical products. It offers vaccines and medicines for the treatment of high blood pressure, elevated cholesterol levels, osteoporosis, asthma, benign prostatic hyperplasia, arthritis, migraine, glaucoma, emesis, infectio…		The Liposome Company and Merck signed an extension to an agreement signed in August 1991 to formulate and test a Merck antigen associated with Liposome's proprietary adjuvant, TLC A-60 to be used against HIV. The proprietary peptide antigen was developed by Merck in collaboration with Repligen.	No		United States
	Merck & Co Inc Merck & Co Inc	Merck & Co Inc Banyu Pharmaceutical Co Ltd			NJ FF	United States Japan	Marketing Services	5122	Merck & Co Inc, located in Whitehouse Station, New Jersey, manufactures and wholesales pharmaceutical products. It offers vaccines and medicines for the treatment of high blood pressure, elevated cholesterol levels, osteoporosis, asthma, benign prostatic hyperplasia, arthritis, migraine, glaucoma, emesis, infectious diseases (antibacterial, antifungal, and antiviral agents), and vaccines to preve…		Banyu Pharmaceuticals, a Japan-based company in which Merck had a majority stake, received the rights from Merck to market its Proscar drug. The drug was used to treat enlarged prostate glands. Proscar was also known as finasteride.	No		Japan
	Yamanouchi Pharmaceutical Co Merck & Co Inc	Yamanouchi Pharmaceutical Co Merck & Co Inc			FF NJ	Japan United States	Marketing Services	5122	Manufacture prescription pharmaceuticals intended for final consumption, including biotech products and antibiotics Merck & Co Inc, located in Whitehouse Station, New Jersey, manufactures and wholesales pharmaceutical products. It offers vaccines and medicines for the treatment of high blood pressure, elevated cholesterol levels, osteoporosis, asthma, benign prostatic hyperplasia, arthritis, migr…		Yamanouchi Pharmaceutical received from Merck & Co. the right to market its Proscar drug. Proscar was used in the treatment of enlarged prostate glands. Sales figures had not been estimated because the drug had not received approval in Japan. Yamanouchi was to apply for approval after the completion of a series of tests on animals and humans. The drug's generic name was finasteride.	No		Japan
	Merck & Co Inc Rhone-Poulenc SA	Merck & Co Inc Pasteur Merieux(Inst Merieux)		50.00 50.00	NJ FF	United States France	Research & Development Services Marketing Services	2836	Merck & Co Inc, located in Whitehouse Station, New Jersey, manufactures and wholesales pharmaceutical products. It offers vaccines and medicines for the treatment of high blood pressure, elevated cholesterol levels, osteoporosis, asthma, benign prostatic hyperplasia, arthritis, migraine, glaucoma, emesis, infectious diseases (antibacterial, antifungal, and antiviral agents), and vaccines to preve…		Merck & Co. and Pasteur Merieux Serums & Vaccins, S.A., a unit of Institut Merieux, signed an agreement to form a joint venture to co-promote combination pediatric vaccines developed as a result of a collaborative development agreement between Merck and Connaught Laboratories, a unit of Pasteur Merieux, in Europe. The joint venture also developed new combination vaccines within the European Commu…	Yes		United States France
	Syntro Corp Bayer AG	Syntro Corp Bayer AG			CA FF	United States Germany	Marketing Services	2833	Manufacture vaccines Bayer AG, located in Leverkusen, Germany, manufactures and wholesales chemicals and pharmaceuticals with operations in four divisions namely Healthcare, which comprises the pharmaceuticals, biological products, consumer care, animal health and diagnostics divisions; Crop Science, which develops and sells fungicides, herbicides, insecticides and seed treatment products; and Ma…		Syntro Corp. and Bayer, A.G. signed an agreement in which Bayer was to market in Europe Syntro's vaccines for pseudorabies, an infectious disease of swine caused by herpesvirus.	No		Germany
	Biosite Diagnostics Merck KGaA	Biosite Diagnostics Merck KGaA			CA FF	United States Germany	Marketing Services	2835	Biotechnology company Merck KGaA, located in Darmstadt, Germany, manufactures and wholesales pharmaceuticals, specialty chemicals, and cosmetic pigments. The company operates under four divisions: Merck Serono (biopharmaceuticals), Consumer Health (over-the-counter pharmaceuticals), Performance Materials (high-tech chemicals) and Merck Millipore (products for pharmaceutical research and biotechno…		Biosite, Inc. and E. Merck, A.G. signed an agreement in which E Merck was to exclusively market and distribute Biosite's Triage panel urine-based diagnostic test, in Europe. The Triage panel detects use of abusive drugs such as PCP, benzodiazepines, cocaines, amphetamines, marijuana, opiates, and barbiturates. E Merck targeted hospitals, labs, HMOs, and drug rehab centers.	No		United States Germany
	Ciba-Geigy AG SIBIA Neurosciences Inc	Ciba-Geigy AG SIBIA Neurosciences Inc			FF CA	Switzerland United States	Research & Development Services Marketing Services Manufacturing Services	2836	Manufacture, develop and wholesale pharmaceutical and chemical products including medicinal, organic and agricultural chemicals, paints Manufacture novel small molecule therapeutics for the treatment of neurodegenerative, neuropsychiatric and neurological disorders		Ciba-Geigy, A.G. and SIBIA, Inc. signed a three-year agreement to jointly develop therapeutics for the treatment of epilepsy, stroke and other diseases of the central nervous system. The therapeutics were based on SIBIA's experience in the exploration of so-called human exictatory amino acid receptors. Exictatory amino acids include the major neurotransmitters that carry signals around the brain.…	No	Ciba-Geigy financed the agreement through an equity stake purchase in SIBIA valued at $5 million.	United States Switzerland
	CSL Ltd Merck & Co Inc	CSL Ltd Merck,Sharp & Dohme Ltd			FF FF	Australia South Africa	Research & Development Services Marketing Services Manufacturing Services Supply Services	2834	Manufacture and wholesale biopharmaceuticals and medical products; holding company Manufacture pharmaceuticals		Australian state-owned CSL Ltd signed an agreement with Merck, Sharp & Dohme (a subsidiary of Merck & Co) to jointly market and develop combination pediatric vaccines (against hepatitis B, haemophilus influenzae B, diphtheria, tetanus and pertussis. The agreement stated that CSL would supply and manufacture the diphtheria tetanus and pertussis components, and Merck would supply its hepatitis B an…	No		Australia Supranational
	Ligand Pharmaceuticals Inc Merck KGaA	Ligand Pharmaceuticals Inc Merck KGaA			CA FF	United States Germany	Research & Development Services Marketing Services Manufacturing Services Funding Services	2836	Ligand Pharmaceuticals Inc, located in San Diego, California, manufacture diagnostic tests for cancer. The company was founded in 1987. Merck KGaA, located in Darmstadt, Germany, manufactures and wholesales pharmaceuticals, specialty chemicals, and cosmetic pigments. The company operates under four divisions: Merck Serono (biopharmaceuticals), Consumer Health (over-the-counter pharmaceuticals), P…		Ligand Pharmaceutical and E Merck AG have entered into an agreement in which Ligand was to use its patented assay system to screen the steroid, flavonoid and isoflavonoid segment of E Merck's compound library. Ligand's system was expected to detect those compounds that acted upon human intracellular receptors through a process called, "ligand-induced, intracellular receptor-mediated gene expressi…	No	Ligand agreed to bear the cost of screening the compounds.	United States Germany
Bayer	Iterex Pharmaceuticals Bayer AG	Iterex Pharmaceuticals Miles-Pharmaceutical Division			CA CT	United States United States	Research & Development Services	3559	Manufacture pharmaceutical products Manufacture pharmaceutical products		Iterex Pharmaceuticals and Miles Inc. Pharmaceutical division signed an agreement for a joint research and development program centering on the discovery of new drugs. Under the agreement, the two companies where to screen Iterex's synthetic peptide libraries in specific Miles assays using Iterex's proprietary peptide screening methods.	No		United States
	ALZA Corp Bayer AG	ALZA Corp Bayer AG			CA FF	United States Germany	Marketing Services	5122	Manufacture and develop pharmaceutical products that incorporate drugs into advanced dosage forms designed to provide controlled, predetermined rates of drug release for extended time periods Bayer AG, located in Leverkusen, Germany, manufactures and wholesales chemicals and pharmaceuticals with operations in four divisions namely Healthcare, which comprises the pharmaceuticals, biological produc…		ALZA Corp. and Bayer, A.G. signed an agreement in which Bayer was to market ALZA's nifedipine(as Adalat OROS) in several international markets. Adalat OROS is a once-a-day dosage form of the drug nifedipine used in the treatment of angina and hypertension.	No		Germany
	Pharmaceutical Proteins Ltd Bayer AG	Pharmaceutical Proteins Ltd Bayer AG			FF FF	United Kingdom Germany	Research & Development Services Funding Services	0752	Manufacture pharmaceuticals Bayer AG, located in Leverkusen, Germany, manufactures and wholesales chemicals and pharmaceuticals with operations in four divisions namely Healthcare, which comprises the pharmaceuticals, biological products, consumer care, animal health and diagnostics divisions; Crop Science, which develops and sells fungicides, herbicides, insecticides and seed treatment products;…		Bayer gave Pharmaceutical Proteins $17.2 million to fund the development of the AAT protein from a genetically engineered sheep. At the time of this report, one ewe was producing the protein in its milk after human genetic material had been injected into an embryo. It was estimated that one in two thousand humans suffered from AAT deficiency, a disorder which often resulted in liver failure.	No	Bayer gave Pharmaceutical Proteins $17.2 million for its research.	United Kingdom
	Roberts Pharmaceutical Corp Bayer AG	Roberts Pharmaceutical Corp Bayer AG			NJ FF	United States Germany	Licensing Services Research & Development Services Marketing Services Exclusive Licensing Services	2834	Manufacture post-discovery drugs in selected therapeutic categories; provide pharmeceutical research services Bayer AG, located in Leverkusen, Germany, manufactures and wholesales chemicals and pharmaceuticals with operations in four divisions namely Healthcare, which comprises the pharmaceuticals, biological products, consumer care, animal health and diagnostics divisions; Crop Science, which de…		Bayer A.G. granted Roberts Pharmaceutical Corp. an exclusive license to develop and market Bayer's Dirame analgesic drug worldwide. Dirame is a non-addictive analgesic designed to relieve moderate to severe pain caused by cancer, traumatic and post-surgical pain, and pain associated with dental surgery and childbirth. Bayer retained co-marketing rights under certain circumstances, and received ro…	No		Germany United States
	Bayer AG Celltech Group PLC	Bayer AG Celltech Group PLC			FF FF	Germany United Kingdom	Licensing Services Research & Development Services Marketing Services Exclusive Licensing Services	2836	Bayer AG, located in Leverkusen, Germany, manufactures and wholesales chemicals and pharmaceuticals with operations in four divisions namely Healthcare, which comprises the pharmaceuticals, biological products, consumer care, animal health and diagnostics divisions; Crop Science, which develops and sells fungicides, herbicides, insecticides and seed treatment products; and Material Science which …		Celltech Group, Plc. granted Bayer, A.G. an exclusive license to develop and market its genetically-engineered antibody, used in the prevention of septic shock, worldwide. Bayer was responsible for the late-phase clinical studies for Celltech's antibody. Bayer also pledged to pay Celltech $47.5 million in milestone payments, and in addition Celltech received royalties on Bayer's sales. Celltech r…	No	Bayer also pledged to pay Celltech $47.5 million in milestone payments, and in addition Celltech received royalties on Bayer's sales.	Germany United Kingdom
	Medrad Inc Bristol-Myers Squibb Co	Medrad Inc Squibb Diagnostics			PA NJ	United States United States	Research & Development Services	8731	Manufacture medical instruments Manufacture diagnostic substances		Medrad and Squibb Diagnostics entered into a non-exclusive agreement to jointly develop syringers with X-ray contrast media for Medrad power injectors.	No		United States
	Eastman Kodak Co Schering AG	Sterling Winthrop Inc Schering AG			NY FF	United States Germany	Licensing Services Marketing Services	5122	Manufacture and wholesale pharmaceuticals. Manufacture and wholesale hormonal contraceptives and preparations, oral formulation, human monoclonal antibodies, immune and therapeutic drugs for hematological malignancies, X-ray contrast media and magnetic resonance imaging for visual diagnostics, and special therapeutic products related to peripheral arterial occlusive diseases, pulmonary hypertensi…		Schering licensed Sterling Winthrop the right to market Omniscan, a magnetic resonance imaging (MRI) agent, in the United States. In addition, Schering received certain options in respect to certain Sterling MRI products as a settlement for a patent dispute that concerned Schering, Sterling, and Nycomed.	No		United States
	Syntro Corp Bayer AG	Syntro Corp Bayer AG			CA FF	United States Germany	Marketing Services	2833	Manufacture vaccines Bayer AG, located in Leverkusen, Germany, manufactures and wholesales chemicals and pharmaceuticals with operations in four divisions namely Healthcare, which comprises the pharmaceuticals, biological products, consumer care, animal health and diagnostics divisions; Crop Science, which develops and sells fungicides, herbicides, insecticides and seed treatment products; and Ma…		Syntro Corp. and Bayer, A.G. signed an agreement in which Bayer was to market in Europe Syntro's vaccines for pseudorabies, an infectious disease of swine caused by herpesvirus.	No		Germany
	Betz Laboratories Inc Sybron Chemical Industries Inc	Betz Laboratories Inc Sybron Chemical Industries Inc			PA NJ	United States United States	Marketing Services	5122	Manufacture and wholesale a wide range of specialty chemical products for the engineered specialty chemical treatment of water and industrial process systems in a wide variety of industrial and commercial applications with particular emphasis on the chemical, petroleum refining, paper, food processing, automotive, steel, and power industries Manufacture specialty chemicals for the environmental a…		Betz Laboratories and Sybron Chemicals agreed to jointly market a secondary waste treatment technology program. Included in the program was Sybron's bacterial cultures and engineering approach to augment waste water treatment. Betz was to provide sales, analytical, and on-site engineering services.	No		United States
	Apichem SpA Bayer AG	Apichem SpA Bayer AG			FF FF	Italy Germany			Manufcature formula chemicals for use in polyurethane and elastomer production Bayer AG, located in Leverkusen, Germany, manufactures and wholesales chemicals and pharmaceuticals with operations in four divisions namely Healthcare, which comprises the pharmaceuticals, biological products, consumer care, animal health and diagnostics divisions; Crop Science, which develops and sells fungicides, he…		Bayer acquired a 49% stake in Apichem from the Brunetti family. The Brunetti family retained a 51% majority interest in Apichem. Apichem had been a supplier of formula chemicals to Bayer for a long time.	No	Bayer acquired a 49% stake in Apichem from the Brunetti family. The Brunetti family retained a 51% majority interest in Apichem. Apichem had been a supplier of formula chemicals to Bayer for a long time.	Italy
	ICI PLC Bayer AG	ICI Americas Inc(ICI PLC) Miles Inc			DE IN	United States United States	Marketing Services	5122	Manufacture natural dyes, agricultural chemicals, resins, pharmaceuticals, and ethylene oxide Manufacture pharmaceutical preparations products, vitamins, organic and inorganic industrial and medicinal chemicals, in vitro and in vivo diagnostic substances, dental equipment and supplies, pigments and enamels, equipment for photography and photoprocessing		ICI Americas, Inc., a unit of ICI, and Miles, Inc., a unit of Bayer, signed an agreement in which ICI Americas and Miles were to co-promote Miles' Cipro quinolone antibiotic. ICI signed the agreement to strengthen its anti-infectives business. In 1991, Cipro had sales of $470 million. Financial terms were not disclosed.	No		United States
	Bayer AG Pharmaceutical Proteins Ltd	Bayer AG Pharmaceutical Proteins Ltd			FF FF	Germany United Kingdom	Marketing Services	5122	Bayer AG, located in Leverkusen, Germany, manufactures and wholesales chemicals and pharmaceuticals with operations in four divisions namely Healthcare, which comprises the pharmaceuticals, biological products, consumer care, animal health and diagnostics divisions; Crop Science, which develops and sells fungicides, herbicides, insecticides and seed treatment products; and Material Science which …		Bayer and Pharmaceutical Proteins signed an agreement in which human alpha-1 antitrypsin (AAT) protein produced in the milk of transgenic sheep was to be commercialized by Bayer. The five-year deal was worth several million dollars. Pharmaceutical Proteins believed the potential market for the product could exceed $170 million. Pharmaceutical Proteins had developed the protein with research fundi…	No		Germany
	Medrad Inc Eastman Kodak Co	Medrad Inc Sterling Winthrop Inc			PA NY	United States United States	Research & Development Services	3841	Manufacture medical instruments Manufacture and wholesale pharmaceuticals.		Medrad, Inc. and Sterling Winthrop, Inc. signed an agreement to jointly develop prefilled syringes, based on Medrad technology, that are compatible with Medrad's power injection systems. Terms were not disclosed.	No		United States
	Bayer AG Kyoto Dai-ichi Kageku Co Ltd	Miles Inc Kyoto Dai-ichi Kageku Co Ltd			IN FF	United States Japan	Licensing Services Marketing Services Exclusive Licensing Services	2835	Manufacture pharmaceutical preparations products, vitamins, organic and inorganic industrial and medicinal chemicals, in vitro and in vivo diagnostic substances, dental equipment and supplies, pigments and enamels, equipment for photography and photoprocessing Manufacture medical testing equipment		Kyoto Dai-ichi Kageku agreed to license its Glucocard blood glucose testing system to Miles, a unit of Bayer AG's Bayer USA. Miles received the exclusive rights to market the home glucose testing system outside Japan. Miles marketed the system as the Glucometer Elite.	No		Supranational
	Schering AG Escada Industrial	Schering AG Escada Industrial		92.00 8.00	FF FF	Germany China	Marketing Services Manufacturing Services	2835	Manufacture and wholesale hormonal contraceptives and preparations, oral formulation, human monoclonal antibodies, immune and therapeutic drugs for hematological malignancies, X-ray contrast media and magnetic resonance imaging for visual diagnostics, and special therapeutic products related to peripheral arterial occlusive diseases, pulmonary hypertension, and multiple sclerosis; provide pharmac…		Schering, A.G. and Chinese state-owned Escada Industrial Corp. signed an agreement to form a joint venture to produce non-ionic contrast media, which is injected into the body before diagnostic medical imaging tests are taken. China was forecasted as a large market for diagnostic imaging products as its diagnostic standards have been upgraded.	Yes		Germany China
	Bayer AG Kyoto Daiichi Kagaku Co Ltd	Miles Inc Kyoto Daiichi Kagaku Co Ltd			IN FF	United States Japan	Marketing Services	5122	Manufacture pharmaceutical preparations products, vitamins, organic and inorganic industrial and medicinal chemicals, in vitro and in vivo diagnostic substances, dental equipment and supplies, pigments and enamels, equipment for photography and photoprocessing Manufacture medical instruments		Miles Inc, a unit of Bayer AG, and Kyoto Daiichi Kagaku agreed to market Kyoto's electrochemical biosensors for diabetes monitoring. Miles received the right to market the technology worldwide, except in Japan and China.	No		Supranational
	Bayer AG Roche Holding AG	Bayer AG Genentech Inc			FF CA	Germany United States	Licensing Services Research & Development Services Exclusive Licensing Services	2836	Bayer AG, located in Leverkusen, Germany, manufactures and wholesales chemicals and pharmaceuticals with operations in four divisions namely Healthcare, which comprises the pharmaceuticals, biological products, consumer care, animal health and diagnostics divisions; Crop Science, which develops and sells fungicides, herbicides, insecticides and seed treatment products; and Material Science which …		Genentech Inc, a unit of Roche Holding, and Bayer AG have entered into an agreement in which Bayer received an exclusive, worldwide license to Genentech's gene for factor VIII. The factor VIII gene was to be developed as a blood clotting factor for hemophilia treatment by Bayer and Viagene. Financial terms were not disclosed.	No		Germany
	Laboratorios Almirall SA Bayer AG	Prodesfarma SA Bayer AG			FF FF	Spain Germany	Marketing Services	5122	Manufacture prescription pharmaceuticals intended for final consumption, including biotech products and antibiotics Bayer AG, located in Leverkusen, Germany, manufactures and wholesales chemicals and pharmaceuticals with operations in four divisions namely Healthcare, which comprises the pharmaceuticals, biological products, consumer care, animal health and diagnostics divisions; Crop Science, wh…		Prodesfarma granted Bayer the right to market its Airtal anti-inflammatory drug in Spain under the brand-name Falcol.	No		Spain
Eli Lilly	American Home Products Corp Eli Lilly & Co	American Home Products Corp Eli Lilly & Co			NJ IN	United States United States	Research & Development Services Marketing Services	2836	Manufacture female oral contraceptives, cardiovascular therapies, mental health agents, anti-inflammatory drugs, hospitable injectables, diabetic therapeutics, cold and allergy products, influenza, cholera, typhoid, diphteria, adenovirus and other vaccines and biologicals, oral hygienes, hemorrhoidal and asthama products, lip care, medicated shampoos, topical analgesics, natural sedatives, dispos…		Whitehall Laboratories, a division of American Home Products Corp., and Eli Lilly & Co., signed an agreement to jointly develop and market an over-the-counter version of Lilly's Axid (nizatidine), a precription antli-ulcer product. Axid is an H2 antagonists, which are effective therapeutic agents in gastro-intestinal disorders caused or aggravated by excess stomach acid. Axid was designed to trea…	No		United States
	Eli Lilly & Co Synaptic Pharmaceutical Corp	Eli Lilly & Co Synaptic Pharmaceutical Corp			IN NJ	United States United States	Research & Development Services	2836	Eli Lilly & Co, located in Indianapolis, Indiana, manufactures and wholesales pharmaceuticals and diagnostic and animal health products. The company specializes in research and development, production and marketing of products for the treatment of diabetes worldwide. It has research and development facilities in nine countries and conducts clinical trials. The company manufactures and distributes…		Eli Lilly & Co and Synaptic Pharmaceutical Corp have agreed to jointly develop Synaptic's serotonin neuroreceptor research for the development of central nervous system drugs to treat migraines, depression, sexual dysfunction, anxiety, sleep disorders and cardiovascular disease. On March 22, 1995, the two firms agreed to extend their relationship for an additional four years. Eli Lilly was also t…	No		United States
[truncated: 37 more rows]

## Sheet: alliances_1993
ALL:1993
company	subsidiary	name alliance partner company	Deal value (mil$)	stake equity	target state	country	industry (high-tech) code	Target SIC code	company description	remarks	deal info
[truncated: 256 more rows]

## Sheet: alliances_1994
ALL:1994
[truncated: 296 more rows]

## Sheet: alliances_1995
ALL:1995
[truncated: 201 more rows]

## Sheet: alliances_1996
ALL:1996
[truncated: 129 more rows]

[truncated: 17 more sheets: alliances_1997, alliances_1998, alliances_1999, alliances_2000, alliances_2001, alliances_2002, alliances_2003, alliances_2004, alliances_2005, alliances_2006, alliances_2007, alliances_2008, alliances_2009, alliances_2010, alliances_2011, alliances_2012, alliances_2013]
